# Supplementary material for: HNF1A is a novel oncogene that regulates human pancreatic cancer stem cell properties
Source: eLife. 2018 Aug 3;7:e33947. doi: 10.7554/eLife.33947 (PMC6122955; doi:10.7554/eLife.33947)
Supplement: Figure 1—source data 1. [file elife-33947-fig1-data1.xlsx]

## Sheet: Figure 1D
NY8 P1	NY8 P2	NY8 P3	NY15 P1	NY15 P2	NY15 P3
0	18	8	0	64	4
0	17	2	0	56	6
0	15	10	0	60	4

## Sheet: Figure 1E
	NY8 P1			NY8 P2			NY8 P3			NY15 P1			NY15 P2			NY15 P3
	Mean	Stndev	n	Mean	Stndev	n	Mean	Stndev	n	Mean	Stndev	n	Mean	Stndev	n	Mean	Stndev	n
A1CF	1	0.034186	3	4.27065	0.054044	3	0.041513	0.001064	3	1	0.042538	3	45.0812	1.27566	3	21.2482	0.457886	3
AGR2	1	0.036894	3	4.36049	0.088971	3	0.239646	0.022353	3	1	0.00566	3	10.3089	0.406235	3	6.34452	0.198295	3
AGTR1	1	0.188666	3	6.0036	0.129374	3	0.050921	0.004277	3	1	0.304759	3	50.2644	4.06881	3	11.045	0.73542	3
ALDH1A1	1	0.023334	3	3.86412	0.109325	3	0.574411	0.016575	3	1	0.026843	3	5.62561	0.374577	3	3.16168	0.141398	3
ANXA10	1	0.023334	3	5.28234	0.27544	3	0.008639	0.00021	3	1	0.031255	3	8.34574	0.44929	3	3.49318	0.039539	3
C14orf105	1	0.042538	3	5.55677	0.113379	3	0.136449	0.015934	3	1	0.057704	3	14.7069	0.300078	3	7.01032	0.341114	3
CABLES1	1	0.024176	3	3.27	0.107645	3	0.8838	0.010245	3	1	0.001245	3	2.7	0.002353	3	1.3855	0.002702	3
CCR6	1	0.065085	3	6.01665	0.289773	3	0.084549	0.036457	3	1	0.053674	3	34.2931	1.7466	3	18.2487	0.887962	3
CD24	1	0.1075	3	5.89789	0.3075	3	1.29329	0.195	3	1	0.0127	3	25.9219	1.2138	3	12.9998	0.3962	3
CDH17	1	0.026843	3	5.466	0.219748	3	0.002813	0.001191	3	1	0.063261	3	40.3241	1.48771	3	19.2698	0.545187	3
CHRM3	1	0.060924	3	2.08576	0.143937	3	0.002515	0.001509	3	1	0.111348	3	2.31681	0.044353	3	0.880547	0.067742	3
CIT	1	0.057275	3	2.04305	0.138833	3	0.708757	0.011345	3	1	0.028008	3	2.29616	0.012775	3	0.817076	0.069954	3
COL17A1	1	0.065943	3	4.26573	0.070382	3	0.11862	0.006794	3	1	0.004002	3	15.2444	0.305001	3	6.45375	0.106482	3
DNAJC22	1	0.060507	3	3.26729	0.039225	3	0.583726	0.014773	3	1	0.04309	3	2.9875	0.094356	3	1.67482	0.006702	3
DPP4	1	0.016499	3	3.50642	0.057854	3	0.001616	0.000323	3	1	0.012005	3	12.3888	0.545102	3	4.07456	1.34736	3
FERMT1	1	0.026843	3	3.55657	0.142984	3	0.351842	0.043689	3	1	0.012005	3	5.81729	0.162929	3	2.86784	0.025663	3
FGD4	1	0.066208	3	4.45932	0.392255	3	0.987073	0.080451	3	1	0.028292	3	11.6396	0.592823	3	7.20931	0.168221	3
GCHFR	1	0.014429	3	2.58452	0.010343	3	0.949679	0.032247	3	1	0.053674	3	6.45027	0.265722	3	4.28349	0.108404	3
GNAI1	1	0.129805	3	2.49109	0.104047	3	0.002389	0.000513	3	1	0.068001	3	7.82295	0.156517	3	2.51047	0.073129	3
GPRC5D	1	0.004002	3	1.86794	0.203853	3	0.732166	0.015778	3	1	0.080479	3	3.75088	0.138384	3	2.44423	0.093866	3
GTSE1	1	0.083455	3	2.3681	0.16092	3	1.62605	0.026829	3	1	0.066208	3	2.40085	0.108702	3	1.07193	0.073973	3
HAS3	1	0.064613	3	2.82585	0.118029	3	0.611798	0.075968	3	1	0.068001	3	5.24226	0.799649	3	2.82497	0.104199	3
HIST1H1D	1	0.001022	3	2.67	0.102334	3	0.0032	1.2e-06	3	1	0.012956	3	2.3163	0.042624	3	0.3426	0.004227	3
HNF1A	1	0.159263	3	2.91167	0.104836	3	0.323448	0.009422	3	1	0.04309	3	5.2422	0.244609	3	3.31549	0.067649	3
HNF4A	1	0.024008	3	4.92256	0.65833	3	0.321555	0.040075	3	1	0.037956	3	31.7713	0.898885	3	19.9637	0.252635	3
HSPG2	1	0.060507	3	2.79593	0.067124	3	0.15283	0.009247	3	1	0.051244	3	5.20449	0.24285	3	2.18867	0.114125	3
HTR1B	1	0.088692	3	3.41888	0.409218	3	0.211885	0.007195	3	1	0.024339	3	4.47205	0.215487	3	2.16807	0.122611	3
HTR1D	1	0.040003	3	2.98886	0.414694	3	1.59615	0.046495	3	1	0.026843	3	8.31272	0.301147	3	3.1213	0.213574	3
IGFBP1	1	0.026843	3	1.82828	0.073502	3	0.001832	0.000542	3	1	0.053835	3	7.9672	0.274258	3	2.74811	0.010998	3
JPH1	1	0.04561	3	4.4813	0.040101	3	0.047697	0.002226	3	1	0.024339	3	11.1612	0.41168	3	5.61832	0.163659	3
LGR5	1	0.147484	3	1.91401	0.152948	3	0.115071	0.051509	3	1	0.148886	3	3.85058	0.574657	3	2.39788	0.201392	3
LIMK2	1	0.008004	3	1.94643	0.077863	3	0.584392	0.005229	3	1	0.062502	3	3.08207	0.133398	3	1.37884	0.044476	3
NID1	1	0.061167	3	2.34286	0.054668	3	0.030271	0.009563	3	1	0.00324	3	3.54411	0.099263	3	0.826932	0.032586	3
NMUR2	1	0.060924	3	6.81715	0.318099	3	0.460553	0.057398	3	1	0.182316	3	52.4428	2.07751	3	28.2593	4.49631	3
NR0B2	1	0.044723	3	6.0375	0.048322	3	0.00517	0.000518	3	1	0.041768	3	15.1843	0.438165	3	4.77097	0.097346	3
NR5A2	1	0.028008	3	1.94494	0.03209	3	0.016799	0.001603	3	1	0.036227	3	3.75827	0.142648	3	1.59061	0.037115	3
RCSD1	1	0.032256	3	1.69425	0.242924	3	0.003353	0.000718	3	1	0.078765	3	7.84621	0.20105	3	0.850692	0.009629	3
RGS17	1	0.063232	3	2.19454	0.098167	3	0.094928	0.001566	3	1	0.036005	3	7.83608	0.812456	3	3.69462	0.168564	3
SAMD5	1	0.007204	3	2.06	0.03508	3	0.0274	0.000414	3	1	0.024623	3	2.532	0.132236	3	1.2222	0.015115	3
SLC15A1	1	0.024339	3	4.14384	0.202396	3	0.006217	0.001356	3	1	0.053835	3	27.5557	1.09161	3	7.37912	0.041762	3
SLC38A1	1	0.020007	3	1.51157	0.07307	3	0.002111	0.000144	3	1	0.074681	3	2.3058	0.058627	3	0.746098	0.021733	3
SLC4A11	1	0.034186	3	2.62952	0.074395	3	0.64372	0.010304	3	1	0.057704	3	6.80323	0.508075	3	3.69275	0.19425	3
SLCO1C1	1	0.004002	3	1.95405	0.101939	3	0.363932	0.120372	3	1	0.084374	3	2.67778	0.254266	3	0.734113	0.05397	3
SLFN13	1	0.034186	3	3.77225	0.166663	3	0.005031	0.00018	3	1	0.120055	3	5.16257	0.212675	3	2.03201	0.074951	3
TBC1D9	1	0.008004	3	1.81	0.080951	3	0.2034	0.009889	3	1	0.072386	3	2.899	0.164709	3	1.6	0.052873	3
TESC	1	0.02913	3	5.06157	0.045293	3	0.144556	0.014115	3	1	0.044181	3	39.663	1.50544	3	27.1845	1.02621	3
TMPO	1	0.008004	3	1.78	0.077863	3	0.7857	0.009563	3	1	0.002387	3	2.29679	0.008622	3	0.8318	0.001713	3
TTLL6	1	0.120703	3	4.44521	0.079553	3	0.24533	0.025187	3	1	0.036005	3	13.3569	0.267238	3	8.49321	1.88015	3
WNK4	1	0.084274	3	4.1021	0.082073	3	0.283453	0.002269	3	1	0.179354	3	9.63834	0.483184	3	3.64962	0.088829	3
ZNF438	1	0.051244	3	2.11976	0.051593	3	0.06277	0.004383	3	1	0.034186	3	2.78105	0.134438	3	1.33736	0.128601	3
Within each row, compare columns (simple effects within rows)										Within each row, compare columns (simple effects within rows)
Number of families	50									Number of families	50
Number of comparisons per family	3									Number of comparisons per family	3
Alpha	0.05									Alpha	0.05
Tukey's multiple comparisons test	Mean Diff.	95.00% CI of diff.	Significant?	Summary	Adjusted P Value					Tukey's multiple comparisons test	Mean Diff.	95.00% CI of diff.	Significant?	Summary	Adjusted P Value
A1CF										A1CF
NY8 P1 vs. NY8 P2	-3.271	-3.499 to -3.042	Yes	****	<0.0001					NY15 P1 vs. NY15 P2	-44.08	-45.37 to -42.79	Yes	****	<0.0001
NY8 P1 vs. NY8 P3	0.9585	0.7302 to 1.187	Yes	****	<0.0001					NY15 P1 vs. NY15 P3	-20.25	-21.54 to -18.96	Yes	****	<0.0001
NY8 P2 vs. NY8 P3	4.229	4.001 to 4.457	Yes	****	<0.0001					NY15 P2 vs. NY15 P3	23.83	22.54 to 25.12	Yes	****	<0.0001
AGR2										AGR2
NY8 P1 vs. NY8 P2	-3.36	-3.589 to -3.132	Yes	****	<0.0001					NY15 P1 vs. NY15 P2	-9.309	-10.6 to -8.017	Yes	****	<0.0001
NY8 P1 vs. NY8 P3	0.7604	0.5321 to 0.9886	Yes	****	<0.0001					NY15 P1 vs. NY15 P3	-5.345	-6.636 to -4.053	Yes	****	<0.0001
NY8 P2 vs. NY8 P3	4.121	3.893 to 4.349	Yes	****	<0.0001					NY15 P2 vs. NY15 P3	3.964	2.673 to 5.256	Yes	****	<0.0001
AGTR1										AGTR1
NY8 P1 vs. NY8 P2	-5.004	-5.232 to -4.775	Yes	****	<0.0001					NY15 P1 vs. NY15 P2	-49.26	-50.56 to -47.97	Yes	****	<0.0001
NY8 P1 vs. NY8 P3	0.9491	0.7208 to 1.177	Yes	****	<0.0001					NY15 P1 vs. NY15 P3	-10.04	-11.34 to -8.753	Yes	****	<0.0001
NY8 P2 vs. NY8 P3	5.953	5.724 to 6.181	Yes	****	<0.0001					NY15 P2 vs. NY15 P3	39.22	37.93 to 40.51	Yes	****	<0.0001
ALDH1A1										ALDH1A1
NY8 P1 vs. NY8 P2	-2.864	-3.092 to -2.636	Yes	****	<0.0001					NY15 P1 vs. NY15 P2	-4.626	-5.917 to -3.334	Yes	****	<0.0001
NY8 P1 vs. NY8 P3	0.4256	0.1973 to 0.6539	Yes	****	<0.0001					NY15 P1 vs. NY15 P3	-2.162	-3.453 to -0.87	Yes	***	0.0003
NY8 P2 vs. NY8 P3	3.29	3.061 to 3.518	Yes	****	<0.0001					NY15 P2 vs. NY15 P3	2.464	1.172 to 3.756	Yes	****	<0.0001
ANXA10										ANXA10
NY8 P1 vs. NY8 P2	-4.282	-4.511 to -4.054	Yes	****	<0.0001					NY15 P1 vs. NY15 P2	-7.346	-8.637 to -6.054	Yes	****	<0.0001
NY8 P1 vs. NY8 P3	0.9914	0.7631 to 1.22	Yes	****	<0.0001					NY15 P1 vs. NY15 P3	-2.493	-3.785 to -1.201	Yes	****	<0.0001
NY8 P2 vs. NY8 P3	5.274	5.045 to 5.502	Yes	****	<0.0001					NY15 P2 vs. NY15 P3	4.853	3.561 to 6.144	Yes	****	<0.0001
C14orf105										C14orf105
NY8 P1 vs. NY8 P2	-4.557	-4.785 to -4.328	Yes	****	<0.0001					NY15 P1 vs. NY15 P2	-13.71	-15 to -12.42	Yes	****	<0.0001
NY8 P1 vs. NY8 P3	0.8636	0.6353 to 1.092	Yes	****	<0.0001					NY15 P1 vs. NY15 P3	-6.01	-7.302 to -4.719	Yes	****	<0.0001
NY8 P2 vs. NY8 P3	5.42	5.192 to 5.649	Yes	****	<0.0001					NY15 P2 vs. NY15 P3	7.697	6.405 to 8.988	Yes	****	<0.0001
CABLES1										CABLES1
NY8 P1 vs. NY8 P2	-2.27	-2.498 to -2.042	Yes	****	<0.0001					NY15 P1 vs. NY15 P2	-1.7	-2.992 to -0.4083	Yes	**	0.006
NY8 P1 vs. NY8 P3	0.1162	-0.1121 to 0.3445	No	ns	0.4547					NY15 P1 vs. NY15 P3	-0.3855	-1.677 to 0.9062	No	ns	0.7619
NY8 P2 vs. NY8 P3	2.386	2.158 to 2.614	Yes	****	<0.0001					NY15 P2 vs. NY15 P3	1.315	0.02278 to 2.606	Yes	*	0.045
CCR6										CCR6
NY8 P1 vs. NY8 P2	-5.017	-5.245 to -4.788	Yes	****	<0.0001					NY15 P1 vs. NY15 P2	-33.29	-34.58 to -32	Yes	****	<0.0001
NY8 P1 vs. NY8 P3	0.9155	0.6872 to 1.144	Yes	****	<0.0001					NY15 P1 vs. NY15 P3	-17.25	-18.54 to -15.96	Yes	****	<0.0001
NY8 P2 vs. NY8 P3	5.932	5.704 to 6.16	Yes	****	<0.0001					NY15 P2 vs. NY15 P3	16.04	14.75 to 17.34	Yes	****	<0.0001
CD24										CD24
NY8 P1 vs. NY8 P2	-4.898	-5.126 to -4.67	Yes	****	<0.0001					NY15 P1 vs. NY15 P2	-24.92	-26.21 to -23.63	Yes	****	<0.0001
NY8 P1 vs. NY8 P3	-0.2933	-0.5216 to -0.06501	Yes	**	0.0076					NY15 P1 vs. NY15 P3	-12	-13.29 to -10.71	Yes	****	<0.0001
NY8 P2 vs. NY8 P3	4.605	4.376 to 4.833	Yes	****	<0.0001					NY15 P2 vs. NY15 P3	12.92	11.63 to 14.21	Yes	****	<0.0001
CDH17										CDH17
NY8 P1 vs. NY8 P2	-4.466	-4.694 to -4.238	Yes	****	<0.0001					NY15 P1 vs. NY15 P2	-39.32	-40.62 to -38.03	Yes	****	<0.0001
NY8 P1 vs. NY8 P3	0.9972	0.7689 to 1.225	Yes	****	<0.0001					NY15 P1 vs. NY15 P3	-18.27	-19.56 to -16.98	Yes	****	<0.0001
NY8 P2 vs. NY8 P3	5.463	5.235 to 5.691	Yes	****	<0.0001					NY15 P2 vs. NY15 P3	21.05	19.76 to 22.35	Yes	****	<0.0001
CHRM3										CHRM3
NY8 P1 vs. NY8 P2	-1.086	-1.314 to -0.8575	Yes	****	<0.0001					NY15 P1 vs. NY15 P2	-1.317	-2.609 to -0.02509	Yes	*	0.0446
NY8 P1 vs. NY8 P3	0.9975	0.7692 to 1.226	Yes	****	<0.0001					NY15 P1 vs. NY15 P3	0.1195	-1.172 to 1.411	No	ns	0.9742
NY8 P2 vs. NY8 P3	2.083	1.855 to 2.312	Yes	****	<0.0001					NY15 P2 vs. NY15 P3	1.436	0.1445 to 2.728	Yes	*	0.0251
CIT										CIT
NY8 P1 vs. NY8 P2	-1.043	-1.271 to -0.8148	Yes	****	<0.0001					NY15 P1 vs. NY15 P2	-1.296	-2.588 to -0.004442	Yes	*	0.049
NY8 P1 vs. NY8 P3	0.2912	0.06297 to 0.5195	Yes	**	0.0081					NY15 P1 vs. NY15 P3	0.1829	-1.109 to 1.475	No	ns	0.9405
NY8 P2 vs. NY8 P3	1.334	1.106 to 1.563	Yes	****	<0.0001					NY15 P2 vs. NY15 P3	1.479	0.1874 to 2.771	Yes	*	0.0202
COL17A1										COL17A1
NY8 P1 vs. NY8 P2	-3.266	-3.494 to -3.037	Yes	****	<0.0001					NY15 P1 vs. NY15 P2	-14.24	-15.54 to -12.95	Yes	****	<0.0001
NY8 P1 vs. NY8 P3	0.8814	0.6531 to 1.11	Yes	****	<0.0001					NY15 P1 vs. NY15 P3	-5.454	-6.745 to -4.162	Yes	****	<0.0001
NY8 P2 vs. NY8 P3	4.147	3.919 to 4.375	Yes	****	<0.0001					NY15 P2 vs. NY15 P3	8.791	7.499 to 10.08	Yes	****	<0.0001
DNAJC22										DNAJC22
NY8 P1 vs. NY8 P2	-2.267	-2.496 to -2.039	Yes	****	<0.0001					NY15 P1 vs. NY15 P2	-1.987	-3.279 to -0.6958	Yes	***	0.001
NY8 P1 vs. NY8 P3	0.4163	0.188 to 0.6445	Yes	****	<0.0001					NY15 P1 vs. NY15 P3	-0.6748	-1.967 to 0.6169	No	ns	0.4361
NY8 P2 vs. NY8 P3	2.684	2.455 to 2.912	Yes	****	<0.0001					NY15 P2 vs. NY15 P3	1.313	0.02095 to 2.604	Yes	*	0.0454
DPP4										DPP4
NY8 P1 vs. NY8 P2	-2.506	-2.735 to -2.278	Yes	****	<0.0001					NY15 P1 vs. NY15 P2	-11.39	-12.68 to -10.1	Yes	****	<0.0001
NY8 P1 vs. NY8 P3	0.9984	0.7701 to 1.227	Yes	****	<0.0001					NY15 P1 vs. NY15 P3	-3.075	-4.366 to -1.783	Yes	****	<0.0001
NY8 P2 vs. NY8 P3	3.505	3.277 to 3.733	Yes	****	<0.0001					NY15 P2 vs. NY15 P3	8.314	7.023 to 9.606	Yes	****	<0.0001
FERMT1										FERMT1
NY8 P1 vs. NY8 P2	-2.557	-2.785 to -2.328	Yes	****	<0.0001					NY15 P1 vs. NY15 P2	-4.817	-6.109 to -3.526	Yes	****	<0.0001
NY8 P1 vs. NY8 P3	0.6482	0.4199 to 0.8764	Yes	****	<0.0001					NY15 P1 vs. NY15 P3	-1.868	-3.16 to -0.5761	Yes	**	0.0022
NY8 P2 vs. NY8 P3	3.205	2.976 to 3.433	Yes	****	<0.0001					NY15 P2 vs. NY15 P3	2.949	1.658 to 4.241	Yes	****	<0.0001
FGD4										FGD4
NY8 P1 vs. NY8 P2	-3.459	-3.688 to -3.231	Yes	****	<0.0001					NY15 P1 vs. NY15 P2	-10.64	-11.93 to -9.348	Yes	****	<0.0001
NY8 P1 vs. NY8 P3	0.01293	-0.2153 to 0.2412	No	ns	0.9902					NY15 P1 vs. NY15 P3	-6.209	-7.501 to -4.918	Yes	****	<0.0001
NY8 P2 vs. NY8 P3	3.472	3.244 to 3.701	Yes	****	<0.0001					NY15 P2 vs. NY15 P3	4.43	3.139 to 5.722	Yes	****	<0.0001
GCHFR										GCHFR
NY8 P1 vs. NY8 P2	-1.585	-1.813 to -1.356	Yes	****	<0.0001					NY15 P1 vs. NY15 P2	-5.45	-6.742 to -4.159	Yes	****	<0.0001
NY8 P1 vs. NY8 P3	0.05032	-0.178 to 0.2786	No	ns	0.862					NY15 P1 vs. NY15 P3	-3.283	-4.575 to -1.992	Yes	****	<0.0001
NY8 P2 vs. NY8 P3	1.635	1.407 to 1.863	Yes	****	<0.0001					NY15 P2 vs. NY15 P3	2.167	0.8751 to 3.458	Yes	***	0.0003
GNAI1										GNAI1
NY8 P1 vs. NY8 P2	-1.491	-1.719 to -1.263	Yes	****	<0.0001					NY15 P1 vs. NY15 P2	-6.823	-8.115 to -5.531	Yes	****	<0.0001
NY8 P1 vs. NY8 P3	0.9976	0.7693 to 1.226	Yes	****	<0.0001					NY15 P1 vs. NY15 P3	-1.51	-2.802 to -0.2187	Yes	*	0.0171
NY8 P2 vs. NY8 P3	2.489	2.26 to 2.717	Yes	****	<0.0001					NY15 P2 vs. NY15 P3	5.312	4.021 to 6.604	Yes	****	<0.0001
GPRC5D										GPRC5D
NY8 P1 vs. NY8 P2	-0.8679	-1.096 to -0.6397	Yes	****	<0.0001					NY15 P1 vs. NY15 P2	-2.751	-4.043 to -1.459	Yes	****	<0.0001
NY8 P1 vs. NY8 P3	0.2678	0.03956 to 0.4961	Yes	*	0.0167					NY15 P1 vs. NY15 P3	-1.444	-2.736 to -0.1525	Yes	*	0.0241
NY8 P2 vs. NY8 P3	1.136	0.9075 to 1.364	Yes	****	<0.0001					NY15 P2 vs. NY15 P3	1.307	0.01493 to 2.598	Yes	*	0.0467
GTSE1										GTSE1
NY8 P1 vs. NY8 P2	-1.368	-1.596 to -1.14	Yes	****	<0.0001					NY15 P1 vs. NY15 P2	-1.401	-2.693 to -0.1091	Yes	*	0.0299
NY8 P1 vs. NY8 P3	-0.6261	-0.8543 to -0.3978	Yes	****	<0.0001					NY15 P1 vs. NY15 P3	-0.07193	-1.364 to 1.22	No	ns	0.9906
NY8 P2 vs. NY8 P3	0.742	0.5138 to 0.9703	Yes	****	<0.0001					NY15 P2 vs. NY15 P3	1.329	0.0372 to 2.621	Yes	*	0.0421
HAS3										HAS3
NY8 P1 vs. NY8 P2	-1.826	-2.054 to -1.598	Yes	****	<0.0001					NY15 P1 vs. NY15 P2	-4.242	-5.534 to -2.951	Yes	****	<0.0001
NY8 P1 vs. NY8 P3	0.3882	0.1599 to 0.6165	Yes	***	0.0002					NY15 P1 vs. NY15 P3	-1.825	-3.117 to -0.5332	Yes	**	0.0028
NY8 P2 vs. NY8 P3	2.214	1.986 to 2.442	Yes	****	<0.0001					NY15 P2 vs. NY15 P3	2.417	1.126 to 3.709	Yes	****	<0.0001
HIST1H1D										HIST1H1D
NY8 P1 vs. NY8 P2	-1.67	-1.898 to -1.442	Yes	****	<0.0001					NY15 P1 vs. NY15 P2	-1.316	-2.608 to -0.02458	Yes	*	0.0447
NY8 P1 vs. NY8 P3	0.9968	0.7685 to 1.225	Yes	****	<0.0001					NY15 P1 vs. NY15 P3	0.6574	-0.6343 to 1.949	No	ns	0.4548
NY8 P2 vs. NY8 P3	2.667	2.439 to 2.895	Yes	****	<0.0001					NY15 P2 vs. NY15 P3	1.974	0.682 to 3.265	Yes	**	0.0011
HNF1A										HNF1A
NY8 P1 vs. NY8 P2	-1.912	-2.14 to -1.683	Yes	****	<0.0001					NY15 P1 vs. NY15 P2	-4.242	-5.534 to -2.95	Yes	****	<0.0001
NY8 P1 vs. NY8 P3	0.6766	0.4483 to 0.9048	Yes	****	<0.0001					NY15 P1 vs. NY15 P3	-2.315	-3.607 to -1.024	Yes	****	<0.0001
NY8 P2 vs. NY8 P3	2.588	2.36 to 2.816	Yes	****	<0.0001					NY15 P2 vs. NY15 P3	1.927	0.635 to 3.218	Yes	**	0.0015
HNF4A										HNF4A
NY8 P1 vs. NY8 P2	-3.923	-4.151 to -3.694	Yes	****	<0.0001					NY15 P1 vs. NY15 P2	-30.77	-32.06 to -29.48	Yes	****	<0.0001
NY8 P1 vs. NY8 P3	0.6784	0.4502 to 0.9067	Yes	****	<0.0001					NY15 P1 vs. NY15 P3	-18.96	-20.26 to -17.67	Yes	****	<0.0001
NY8 P2 vs. NY8 P3	4.601	4.373 to 4.829	Yes	****	<0.0001					NY15 P2 vs. NY15 P3	11.81	10.52 to 13.1	Yes	****	<0.0001
HSPG2										HSPG2
NY8 P1 vs. NY8 P2	-1.796	-2.024 to -1.568	Yes	****	<0.0001					NY15 P1 vs. NY15 P2	-4.204	-5.496 to -2.913	Yes	****	<0.0001
NY8 P1 vs. NY8 P3	0.8472	0.6189 to 1.075	Yes	****	<0.0001					NY15 P1 vs. NY15 P3	-1.189	-2.48 to 0.1031	No	ns	0.0785
NY8 P2 vs. NY8 P3	2.643	2.415 to 2.871	Yes	****	<0.0001					NY15 P2 vs. NY15 P3	3.016	1.724 to 4.308	Yes	****	<0.0001
HTR1B										HTR1B
NY8 P1 vs. NY8 P2	-2.419	-2.647 to -2.191	Yes	****	<0.0001					NY15 P1 vs. NY15 P2	-3.472	-4.764 to -2.18	Yes	****	<0.0001
NY8 P1 vs. NY8 P3	0.7881	0.5598 to 1.016	Yes	****	<0.0001					NY15 P1 vs. NY15 P3	-1.168	-2.46 to 0.1237	No	ns	0.0856
NY8 P2 vs. NY8 P3	3.207	2.979 to 3.435	Yes	****	<0.0001					NY15 P2 vs. NY15 P3	2.304	1.012 to 3.596	Yes	***	0.0001
HTR1D										HTR1D
NY8 P1 vs. NY8 P2	-1.989	-2.217 to -1.761	Yes	****	<0.0001					NY15 P1 vs. NY15 P2	-7.313	-8.604 to -6.021	Yes	****	<0.0001
NY8 P1 vs. NY8 P3	-0.5961	-0.8244 to -0.3679	Yes	****	<0.0001					NY15 P1 vs. NY15 P3	-2.121	-3.413 to -0.8296	Yes	***	0.0004
NY8 P2 vs. NY8 P3	1.393	1.164 to 1.621	Yes	****	<0.0001					NY15 P2 vs. NY15 P3	5.191	3.9 to 6.483	Yes	****	<0.0001
IGFBP1										IGFBP1
NY8 P1 vs. NY8 P2	-0.8283	-1.057 to -0.6	Yes	****	<0.0001					NY15 P1 vs. NY15 P2	-6.967	-8.259 to -5.675	Yes	****	<0.0001
NY8 P1 vs. NY8 P3	0.9982	0.7699 to 1.226	Yes	****	<0.0001					NY15 P1 vs. NY15 P3	-1.748	-3.04 to -0.4564	Yes	**	0.0045
NY8 P2 vs. NY8 P3	1.826	1.598 to 2.055	Yes	****	<0.0001					NY15 P2 vs. NY15 P3	5.219	3.927 to 6.511	Yes	****	<0.0001
JPH1										JPH1
NY8 P1 vs. NY8 P2	-3.481	-3.71 to -3.253	Yes	****	<0.0001					NY15 P1 vs. NY15 P2	-10.16	-11.45 to -8.869	Yes	****	<0.0001
NY8 P1 vs. NY8 P3	0.9523	0.724 to 1.181	Yes	****	<0.0001					NY15 P1 vs. NY15 P3	-4.618	-5.91 to -3.327	Yes	****	<0.0001
NY8 P2 vs. NY8 P3	4.434	4.205 to 4.662	Yes	****	<0.0001					NY15 P2 vs. NY15 P3	5.543	4.251 to 6.835	Yes	****	<0.0001
LGR5										LGR5
NY8 P1 vs. NY8 P2	-0.914	-1.142 to -0.6857	Yes	****	<0.0001					NY15 P1 vs. NY15 P2	-2.851	-4.142 to -1.559	Yes	****	<0.0001
NY8 P1 vs. NY8 P3	0.8849	0.6567 to 1.113	Yes	****	<0.0001					NY15 P1 vs. NY15 P3	-1.398	-2.69 to -0.1062	Yes	*	0.0303
NY8 P2 vs. NY8 P3	1.799	1.571 to 2.027	Yes	****	<0.0001					NY15 P2 vs. NY15 P3	1.453	0.161 to 2.744	Yes	*	0.0231
LIMK2										LIMK2
NY8 P1 vs. NY8 P2	-0.9464	-1.175 to -0.7182	Yes	****	<0.0001					NY15 P1 vs. NY15 P2	-2.082	-3.374 to -0.7903	Yes	***	0.0005
NY8 P1 vs. NY8 P3	0.4156	0.1873 to 0.6439	Yes	****	<0.0001					NY15 P1 vs. NY15 P3	-0.3788	-1.671 to 0.9129	No	ns	0.7691
NY8 P2 vs. NY8 P3	1.362	1.134 to 1.59	Yes	****	<0.0001					NY15 P2 vs. NY15 P3	1.703	0.4115 to 2.995	Yes	**	0.0059
NID1										NID1
NY8 P1 vs. NY8 P2	-1.343	-1.571 to -1.115	Yes	****	<0.0001					NY15 P1 vs. NY15 P2	-2.544	-3.836 to -1.252	Yes	****	<0.0001
NY8 P1 vs. NY8 P3	0.9697	0.7415 to 1.198	Yes	****	<0.0001					NY15 P1 vs. NY15 P3	0.1731	-1.119 to 1.465	No	ns	0.9466
NY8 P2 vs. NY8 P3	2.313	2.084 to 2.541	Yes	****	<0.0001					NY15 P2 vs. NY15 P3	2.717	1.425 to 4.009	Yes	****	<0.0001
NMUR2										NMUR2
NY8 P1 vs. NY8 P2	-5.817	-6.045 to -5.589	Yes	****	<0.0001					NY15 P1 vs. NY15 P2	-51.44	-52.73 to -50.15	Yes	****	<0.0001
NY8 P1 vs. NY8 P3	0.5394	0.3112 to 0.7677	Yes	****	<0.0001					NY15 P1 vs. NY15 P3	-27.26	-28.55 to -25.97	Yes	****	<0.0001
NY8 P2 vs. NY8 P3	6.357	6.128 to 6.585	Yes	****	<0.0001					NY15 P2 vs. NY15 P3	24.18	22.89 to 25.48	Yes	****	<0.0001
NR0B2										NR0B2
NY8 P1 vs. NY8 P2	-5.038	-5.266 to -4.809	Yes	****	<0.0001					NY15 P1 vs. NY15 P2	-14.18	-15.48 to -12.89	Yes	****	<0.0001
NY8 P1 vs. NY8 P3	0.9948	0.7666 to 1.223	Yes	****	<0.0001					NY15 P1 vs. NY15 P3	-3.771	-5.063 to -2.479	Yes	****	<0.0001
NY8 P2 vs. NY8 P3	6.032	5.804 to 6.261	Yes	****	<0.0001					NY15 P2 vs. NY15 P3	10.41	9.122 to 11.71	Yes	****	<0.0001
NR5A2										NR5A2
NY8 P1 vs. NY8 P2	-0.9449	-1.173 to -0.7167	Yes	****	<0.0001					NY15 P1 vs. NY15 P2	-2.758	-4.05 to -1.467	Yes	****	<0.0001
NY8 P1 vs. NY8 P3	0.9832	0.7549 to 1.211	Yes	****	<0.0001					NY15 P1 vs. NY15 P3	-0.5906	-1.882 to 0.7011	No	ns	0.5291
NY8 P2 vs. NY8 P3	1.928	1.7 to 2.156	Yes	****	<0.0001					NY15 P2 vs. NY15 P3	2.168	0.8759 to 3.459	Yes	***	0.0003
RCSD1										RCSD1
NY8 P1 vs. NY8 P2	-0.6942	-0.9225 to -0.466	Yes	****	<0.0001					NY15 P1 vs. NY15 P2	-6.846	-8.138 to -5.554	Yes	****	<0.0001
NY8 P1 vs. NY8 P3	0.9966	0.7684 to 1.225	Yes	****	<0.0001					NY15 P1 vs. NY15 P3	0.1493	-1.142 to 1.441	No	ns	0.96
NY8 P2 vs. NY8 P3	1.691	1.463 to 1.919	Yes	****	<0.0001					NY15 P2 vs. NY15 P3	6.996	5.704 to 8.287	Yes	****	<0.0001
RGS17										RGS17
NY8 P1 vs. NY8 P2	-1.195	-1.423 to -0.9663	Yes	****	<0.0001					NY15 P1 vs. NY15 P2	-6.836	-8.128 to -5.544	Yes	****	<0.0001
NY8 P1 vs. NY8 P3	0.9051	0.6768 to 1.133	Yes	****	<0.0001					NY15 P1 vs. NY15 P3	-2.695	-3.986 to -1.403	Yes	****	<0.0001
NY8 P2 vs. NY8 P3	2.1	1.871 to 2.328	Yes	****	<0.0001					NY15 P2 vs. NY15 P3	4.141	2.85 to 5.433	Yes	****	<0.0001
SAMD5										SAMD5
NY8 P1 vs. NY8 P2	-1.06	-1.288 to -0.8317	Yes	****	<0.0001					NY15 P1 vs. NY15 P2	-1.532	-2.824 to -0.2403	Yes	*	0.0153
NY8 P1 vs. NY8 P3	0.9726	0.7443 to 1.201	Yes	****	<0.0001					NY15 P1 vs. NY15 P3	-0.2222	-1.514 to 1.07	No	ns	0.9135
NY8 P2 vs. NY8 P3	2.033	1.804 to 2.261	Yes	****	<0.0001					NY15 P2 vs. NY15 P3	1.31	0.01808 to 2.602	Yes	*	0.046
SLC15A1										SLC15A1
NY8 P1 vs. NY8 P2	-3.144	-3.372 to -2.916	Yes	****	<0.0001					NY15 P1 vs. NY15 P2	-26.56	-27.85 to -25.26	Yes	****	<0.0001
NY8 P1 vs. NY8 P3	0.9938	0.7655 to 1.222	Yes	****	<0.0001					NY15 P1 vs. NY15 P3	-6.379	-7.671 to -5.087	Yes	****	<0.0001
NY8 P2 vs. NY8 P3	4.138	3.909 to 4.366	Yes	****	<0.0001					NY15 P2 vs. NY15 P3	20.18	18.88 to 21.47	Yes	****	<0.0001
SLC38A1										SLC38A1
NY8 P1 vs. NY8 P2	-0.5116	-0.7398 to -0.2833	Yes	****	<0.0001					NY15 P1 vs. NY15 P2	-1.306	-2.598 to -0.01408	Yes	*	0.0469
NY8 P1 vs. NY8 P3	0.9979	0.7696 to 1.226	Yes	****	<0.0001					NY15 P1 vs. NY15 P3	0.2539	-1.038 to 1.546	No	ns	0.8886
NY8 P2 vs. NY8 P3	1.509	1.281 to 1.738	Yes	****	<0.0001					NY15 P2 vs. NY15 P3	1.56	0.268 to 2.851	Yes	*	0.0132
SLC4A11										SLC4A11
NY8 P1 vs. NY8 P2	-1.63	-1.858 to -1.401	Yes	****	<0.0001					NY15 P1 vs. NY15 P2	-5.803	-7.095 to -4.512	Yes	****	<0.0001
NY8 P1 vs. NY8 P3	0.3563	0.128 to 0.5846	Yes	***	0.0008					NY15 P1 vs. NY15 P3	-2.693	-3.984 to -1.401	Yes	****	<0.0001
NY8 P2 vs. NY8 P3	1.986	1.758 to 2.214	Yes	****	<0.0001					NY15 P2 vs. NY15 P3	3.11	1.819 to 4.402	Yes	****	<0.0001
SLCO1C1										SLCO1C1
NY8 P1 vs. NY8 P2	-0.954	-1.182 to -0.7258	Yes	****	<0.0001					NY15 P1 vs. NY15 P2	-1.678	-2.97 to -0.3861	Yes	**	0.0068
NY8 P1 vs. NY8 P3	0.6361	0.4078 to 0.8643	Yes	****	<0.0001					NY15 P1 vs. NY15 P3	0.2659	-1.026 to 1.558	No	ns	0.8786
NY8 P2 vs. NY8 P3	1.59	1.362 to 1.818	Yes	****	<0.0001					NY15 P2 vs. NY15 P3	1.944	0.6519 to 3.235	Yes	**	0.0013
SLFN13										SLFN13
NY8 P1 vs. NY8 P2	-2.772	-3.001 to -2.544	Yes	****	<0.0001					NY15 P1 vs. NY15 P2	-4.163	-5.454 to -2.871	Yes	****	<0.0001
NY8 P1 vs. NY8 P3	0.995	0.7667 to 1.223	Yes	****	<0.0001					NY15 P1 vs. NY15 P3	-1.032	-2.324 to 0.2597	No	ns	0.1457
NY8 P2 vs. NY8 P3	3.767	3.539 to 3.995	Yes	****	<0.0001					NY15 P2 vs. NY15 P3	3.131	1.839 to 4.422	Yes	****	<0.0001
TBC1D9										TBC1D9
NY8 P1 vs. NY8 P2	-0.81	-1.038 to -0.5817	Yes	****	<0.0001					NY15 P1 vs. NY15 P2	-1.899	-3.191 to -0.6073	Yes	**	0.0018
NY8 P1 vs. NY8 P3	0.7966	0.5683 to 1.025	Yes	****	<0.0001					NY15 P1 vs. NY15 P3	-0.6	-1.892 to 0.6917	No	ns	0.5185
NY8 P2 vs. NY8 P3	1.607	1.378 to 1.835	Yes	****	<0.0001					NY15 P2 vs. NY15 P3	1.299	0.007277 to 2.591	Yes	*	0.0484
TESC										TESC
NY8 P1 vs. NY8 P2	-4.062	-4.29 to -3.833	Yes	****	<0.0001					NY15 P1 vs. NY15 P2	-38.66	-39.95 to -37.37	Yes	****	<0.0001
NY8 P1 vs. NY8 P3	0.8554	0.6272 to 1.084	Yes	****	<0.0001					NY15 P1 vs. NY15 P3	-26.18	-27.48 to -24.89	Yes	****	<0.0001
NY8 P2 vs. NY8 P3	4.917	4.689 to 5.145	Yes	****	<0.0001					NY15 P2 vs. NY15 P3	12.48	11.19 to 13.77	Yes	****	<0.0001
TMPO										TMPO
NY8 P1 vs. NY8 P2	-0.78	-1.008 to -0.5517	Yes	****	<0.0001					NY15 P1 vs. NY15 P2	-1.297	-2.589 to -0.005068	Yes	*	0.0489
NY8 P1 vs. NY8 P3	0.2143	-0.01397 to 0.4426	No	ns	0.0709					NY15 P1 vs. NY15 P3	0.1682	-1.124 to 1.46	No	ns	0.9495
NY8 P2 vs. NY8 P3	0.9943	0.766 to 1.223	Yes	****	<0.0001					NY15 P2 vs. NY15 P3	1.465	0.1733 to 2.757	Yes	*	0.0217
TTLL6										TTLL6
NY8 P1 vs. NY8 P2	-3.445	-3.673 to -3.217	Yes	****	<0.0001					NY15 P1 vs. NY15 P2	-12.36	-13.65 to -11.07	Yes	****	<0.0001
NY8 P1 vs. NY8 P3	0.7547	0.5264 to 0.9829	Yes	****	<0.0001					NY15 P1 vs. NY15 P3	-7.493	-8.785 to -6.201	Yes	****	<0.0001
NY8 P2 vs. NY8 P3	4.2	3.972 to 4.428	Yes	****	<0.0001					NY15 P2 vs. NY15 P3	4.864	3.572 to 6.155	Yes	****	<0.0001
WNK4										WNK4
NY8 P1 vs. NY8 P2	-3.102	-3.33 to -2.874	Yes	****	<0.0001					NY15 P1 vs. NY15 P2	-8.638	-9.93 to -7.347	Yes	****	<0.0001
NY8 P1 vs. NY8 P3	0.7165	0.4883 to 0.9448	Yes	****	<0.0001					NY15 P1 vs. NY15 P3	-2.65	-3.941 to -1.358	Yes	****	<0.0001
NY8 P2 vs. NY8 P3	3.819	3.59 to 4.047	Yes	****	<0.0001					NY15 P2 vs. NY15 P3	5.989	4.697 to 7.28	Yes	****	<0.0001
ZNF438										ZNF438
NY8 P1 vs. NY8 P2	-1.12	-1.348 to -0.8915	Yes	****	<0.0001					NY15 P1 vs. NY15 P2	-1.781	-3.073 to -0.4893	Yes	**	0.0037
NY8 P1 vs. NY8 P3	0.9372	0.709 to 1.166	Yes	****	<0.0001					NY15 P1 vs. NY15 P3	-0.3374	-1.629 to 0.9544	No	ns	0.8119
NY8 P2 vs. NY8 P3	2.057	1.829 to 2.285	Yes	****	<0.0001					NY15 P2 vs. NY15 P3	1.444	0.152 to 2.735	Yes	*	0.0241
Test details	Mean 1	Mean 2	Mean Diff.	SE of diff.	N1	N2	q	DF		Test details	Mean 1	Mean 2	Mean Diff.	SE of diff.	N1	N2	q	DF
A1CF										A1CF
NY8 P1 vs. NY8 P2	1	4.271	-3.271	0.09691	3	3	47.73	300		NY15 P1 vs. NY15 P2	1	45.08	-44.08	0.5484	3	3	113.7	300
NY8 P1 vs. NY8 P3	1	0.04151	0.9585	0.09691	3	3	13.99	300		NY15 P1 vs. NY15 P3	1	21.25	-20.25	0.5484	3	3	52.22	300
NY8 P2 vs. NY8 P3	4.271	0.04151	4.229	0.09691	3	3	61.71	300		NY15 P2 vs. NY15 P3	45.08	21.25	23.83	0.5484	3	3	61.46	300
AGR2										AGR2
NY8 P1 vs. NY8 P2	1	4.36	-3.36	0.09691	3	3	49.04	300		NY15 P1 vs. NY15 P2	1	10.31	-9.309	0.5484	3	3	24.01	300
NY8 P1 vs. NY8 P3	1	0.2396	0.7604	0.09691	3	3	11.1	300		NY15 P1 vs. NY15 P3	1	6.345	-5.345	0.5484	3	3	13.78	300
NY8 P2 vs. NY8 P3	4.36	0.2396	4.121	0.09691	3	3	60.13	300		NY15 P2 vs. NY15 P3	10.31	6.345	3.964	0.5484	3	3	10.22	300
AGTR1										AGTR1
NY8 P1 vs. NY8 P2	1	6.004	-5.004	0.09691	3	3	73.01	300		NY15 P1 vs. NY15 P2	1	50.26	-49.26	0.5484	3	3	127	300
NY8 P1 vs. NY8 P3	1	0.05092	0.9491	0.09691	3	3	13.85	300		NY15 P1 vs. NY15 P3	1	11.04	-10.04	0.5484	3	3	25.9	300
NY8 P2 vs. NY8 P3	6.004	0.05092	5.953	0.09691	3	3	86.86	300		NY15 P2 vs. NY15 P3	50.26	11.04	39.22	0.5484	3	3	101.1	300
ALDH1A1										ALDH1A1
NY8 P1 vs. NY8 P2	1	3.864	-2.864	0.09691	3	3	41.79	300		NY15 P1 vs. NY15 P2	1	5.626	-4.626	0.5484	3	3	11.93	300
NY8 P1 vs. NY8 P3	1	0.5744	0.4256	0.09691	3	3	6.21	300		NY15 P1 vs. NY15 P3	1	3.162	-2.162	0.5484	3	3	5.574	300
NY8 P2 vs. NY8 P3	3.864	0.5744	3.29	0.09691	3	3	48	300		NY15 P2 vs. NY15 P3	5.626	3.162	2.464	0.5484	3	3	6.354	300
ANXA10										ANXA10
NY8 P1 vs. NY8 P2	1	5.282	-4.282	0.09691	3	3	62.49	300		NY15 P1 vs. NY15 P2	1	8.346	-7.346	0.5484	3	3	18.94	300
NY8 P1 vs. NY8 P3	1	0.008639	0.9914	0.09691	3	3	14.47	300		NY15 P1 vs. NY15 P3	1	3.493	-2.493	0.5484	3	3	6.429	300
NY8 P2 vs. NY8 P3	5.282	0.008639	5.274	0.09691	3	3	76.96	300		NY15 P2 vs. NY15 P3	8.346	3.493	4.853	0.5484	3	3	12.51	300
C14orf105										C14orf105
NY8 P1 vs. NY8 P2	1	5.557	-4.557	0.09691	3	3	66.49	300		NY15 P1 vs. NY15 P2	1	14.71	-13.71	0.5484	3	3	35.35	300
NY8 P1 vs. NY8 P3	1	0.1364	0.8636	0.09691	3	3	12.6	300		NY15 P1 vs. NY15 P3	1	7.01	-6.01	0.5484	3	3	15.5	300
NY8 P2 vs. NY8 P3	5.557	0.1364	5.42	0.09691	3	3	79.1	300		NY15 P2 vs. NY15 P3	14.71	7.01	7.697	0.5484	3	3	19.85	300
CABLES1										CABLES1
NY8 P1 vs. NY8 P2	1	3.27	-2.27	0.09691	3	3	33.12	300		NY15 P1 vs. NY15 P2	1	2.7	-1.7	0.5484	3	3	4.384	300
NY8 P1 vs. NY8 P3	1	0.8838	0.1162	0.09691	3	3	1.696	300		NY15 P1 vs. NY15 P3	1	1.386	-0.3855	0.5484	3	3	0.9941	300
NY8 P2 vs. NY8 P3	3.27	0.8838	2.386	0.09691	3	3	34.82	300		NY15 P2 vs. NY15 P3	2.7	1.386	1.315	0.5484	3	3	3.39	300
CCR6										CCR6
NY8 P1 vs. NY8 P2	1	6.017	-5.017	0.09691	3	3	73.2	300		NY15 P1 vs. NY15 P2	1	34.29	-33.29	0.5484	3	3	85.85	300
NY8 P1 vs. NY8 P3	1	0.08455	0.9155	0.09691	3	3	13.36	300		NY15 P1 vs. NY15 P3	1	18.25	-17.25	0.5484	3	3	44.48	300
NY8 P2 vs. NY8 P3	6.017	0.08455	5.932	0.09691	3	3	86.56	300		NY15 P2 vs. NY15 P3	34.29	18.25	16.04	0.5484	3	3	41.37	300
CD24										CD24
NY8 P1 vs. NY8 P2	1	5.898	-4.898	0.09691	3	3	71.47	300		NY15 P1 vs. NY15 P2	1	25.92	-24.92	0.5484	3	3	64.27	300
NY8 P1 vs. NY8 P3	1	1.293	-0.2933	0.09691	3	3	4.28	300		NY15 P1 vs. NY15 P3	1	13	-12	0.5484	3	3	30.94	300
NY8 P2 vs. NY8 P3	5.898	1.293	4.605	0.09691	3	3	67.19	300		NY15 P2 vs. NY15 P3	25.92	13	12.92	0.5484	3	3	33.32	300
CDH17										CDH17
NY8 P1 vs. NY8 P2	1	5.466	-4.466	0.09691	3	3	65.17	300		NY15 P1 vs. NY15 P2	1	40.32	-39.32	0.5484	3	3	101.4	300
NY8 P1 vs. NY8 P3	1	0.002813	0.9972	0.09691	3	3	14.55	300		NY15 P1 vs. NY15 P3	1	19.27	-18.27	0.5484	3	3	47.11	300
NY8 P2 vs. NY8 P3	5.466	0.002813	5.463	0.09691	3	3	79.72	300		NY15 P2 vs. NY15 P3	40.32	19.27	21.05	0.5484	3	3	54.29	300
CHRM3										CHRM3
NY8 P1 vs. NY8 P2	1	2.086	-1.086	0.09691	3	3	15.84	300		NY15 P1 vs. NY15 P2	1	2.317	-1.317	0.5484	3	3	3.396	300
NY8 P1 vs. NY8 P3	1	0.002515	0.9975	0.09691	3	3	14.56	300		NY15 P1 vs. NY15 P3	1	0.8805	0.1195	0.5484	3	3	0.308	300
NY8 P2 vs. NY8 P3	2.086	0.002515	2.083	0.09691	3	3	30.4	300		NY15 P2 vs. NY15 P3	2.317	0.8805	1.436	0.5484	3	3	3.704	300
CIT										CIT
NY8 P1 vs. NY8 P2	1	2.043	-1.043	0.09691	3	3	15.22	300		NY15 P1 vs. NY15 P2	1	2.296	-1.296	0.5484	3	3	3.343	300
NY8 P1 vs. NY8 P3	1	0.7088	0.2912	0.09691	3	3	4.25	300		NY15 P1 vs. NY15 P3	1	0.8171	0.1829	0.5484	3	3	0.4717	300
NY8 P2 vs. NY8 P3	2.043	0.7088	1.334	0.09691	3	3	19.47	300		NY15 P2 vs. NY15 P3	2.296	0.8171	1.479	0.5484	3	3	3.814	300
COL17A1										COL17A1
NY8 P1 vs. NY8 P2	1	4.266	-3.266	0.09691	3	3	47.65	300		NY15 P1 vs. NY15 P2	1	15.24	-14.24	0.5484	3	3	36.73	300
NY8 P1 vs. NY8 P3	1	0.1186	0.8814	0.09691	3	3	12.86	300		NY15 P1 vs. NY15 P3	1	6.454	-5.454	0.5484	3	3	14.06	300
NY8 P2 vs. NY8 P3	4.266	0.1186	4.147	0.09691	3	3	60.52	300		NY15 P2 vs. NY15 P3	15.24	6.454	8.791	0.5484	3	3	22.67	300
DNAJC22										DNAJC22
NY8 P1 vs. NY8 P2	1	3.267	-2.267	0.09691	3	3	33.09	300		NY15 P1 vs. NY15 P2	1	2.987	-1.987	0.5484	3	3	5.125	300
NY8 P1 vs. NY8 P3	1	0.5837	0.4163	0.09691	3	3	6.074	300		NY15 P1 vs. NY15 P3	1	1.675	-0.6748	0.5484	3	3	1.74	300
NY8 P2 vs. NY8 P3	3.267	0.5837	2.684	0.09691	3	3	39.16	300		NY15 P2 vs. NY15 P3	2.987	1.675	1.313	0.5484	3	3	3.385	300
DPP4										DPP4
NY8 P1 vs. NY8 P2	1	3.506	-2.506	0.09691	3	3	36.57	300		NY15 P1 vs. NY15 P2	1	12.39	-11.39	0.5484	3	3	29.37	300
NY8 P1 vs. NY8 P3	1	0.001616	0.9984	0.09691	3	3	14.57	300		NY15 P1 vs. NY15 P3	1	4.075	-3.075	0.5484	3	3	7.929	300
NY8 P2 vs. NY8 P3	3.506	0.001616	3.505	0.09691	3	3	51.14	300		NY15 P2 vs. NY15 P3	12.39	4.075	8.314	0.5484	3	3	21.44	300
FERMT1										FERMT1
NY8 P1 vs. NY8 P2	1	3.557	-2.557	0.09691	3	3	37.31	300		NY15 P1 vs. NY15 P2	1	5.817	-4.817	0.5484	3	3	12.42	300
NY8 P1 vs. NY8 P3	1	0.3518	0.6482	0.09691	3	3	9.458	300		NY15 P1 vs. NY15 P3	1	2.868	-1.868	0.5484	3	3	4.817	300
NY8 P2 vs. NY8 P3	3.557	0.3518	3.205	0.09691	3	3	46.76	300		NY15 P2 vs. NY15 P3	5.817	2.868	2.949	0.5484	3	3	7.606	300
FGD4										FGD4
NY8 P1 vs. NY8 P2	1	4.459	-3.459	0.09691	3	3	50.48	300		NY15 P1 vs. NY15 P2	1	11.64	-10.64	0.5484	3	3	27.44	300
NY8 P1 vs. NY8 P3	1	0.9871	0.01293	0.09691	3	3	0.1886	300		NY15 P1 vs. NY15 P3	1	7.209	-6.209	0.5484	3	3	16.01	300
NY8 P2 vs. NY8 P3	4.459	0.9871	3.472	0.09691	3	3	50.67	300		NY15 P2 vs. NY15 P3	11.64	7.209	4.43	0.5484	3	3	11.42	300
GCHFR										GCHFR
NY8 P1 vs. NY8 P2	1	2.585	-1.585	0.09691	3	3	23.12	300		NY15 P1 vs. NY15 P2	1	6.45	-5.45	0.5484	3	3	14.05	300
NY8 P1 vs. NY8 P3	1	0.9497	0.05032	0.09691	3	3	0.7343	300		NY15 P1 vs. NY15 P3	1	4.283	-3.283	0.5484	3	3	8.467	300
NY8 P2 vs. NY8 P3	2.585	0.9497	1.635	0.09691	3	3	23.86	300		NY15 P2 vs. NY15 P3	6.45	4.283	2.167	0.5484	3	3	5.588	300
GNAI1										GNAI1
NY8 P1 vs. NY8 P2	1	2.491	-1.491	0.09691	3	3	21.76	300		NY15 P1 vs. NY15 P2	1	7.823	-6.823	0.5484	3	3	17.59	300
NY8 P1 vs. NY8 P3	1	0.002389	0.9976	0.09691	3	3	14.56	300		NY15 P1 vs. NY15 P3	1	2.51	-1.51	0.5484	3	3	3.895	300
NY8 P2 vs. NY8 P3	2.491	0.002389	2.489	0.09691	3	3	36.32	300		NY15 P2 vs. NY15 P3	7.823	2.51	5.312	0.5484	3	3	13.7	300
GPRC5D										GPRC5D
NY8 P1 vs. NY8 P2	1	1.868	-0.8679	0.09691	3	3	12.67	300		NY15 P1 vs. NY15 P2	1	3.751	-2.751	0.5484	3	3	7.094	300
NY8 P1 vs. NY8 P3	1	0.7322	0.2678	0.09691	3	3	3.908	300		NY15 P1 vs. NY15 P3	1	2.444	-1.444	0.5484	3	3	3.724	300
NY8 P2 vs. NY8 P3	1.868	0.7322	1.136	0.09691	3	3	16.57	300		NY15 P2 vs. NY15 P3	3.751	2.444	1.307	0.5484	3	3	3.37	300
GTSE1										GTSE1
NY8 P1 vs. NY8 P2	1	2.368	-1.368	0.09691	3	3	19.96	300		NY15 P1 vs. NY15 P2	1	2.401	-1.401	0.5484	3	3	3.612	300
NY8 P1 vs. NY8 P3	1	1.626	-0.6261	0.09691	3	3	9.136	300		NY15 P1 vs. NY15 P3	1	1.072	-0.07193	0.5484	3	3	0.1855	300
NY8 P2 vs. NY8 P3	2.368	1.626	0.742	0.09691	3	3	10.83	300		NY15 P2 vs. NY15 P3	2.401	1.072	1.329	0.5484	3	3	3.427	300
HAS3										HAS3
NY8 P1 vs. NY8 P2	1	2.826	-1.826	0.09691	3	3	26.64	300		NY15 P1 vs. NY15 P2	1	5.242	-4.242	0.5484	3	3	10.94	300
NY8 P1 vs. NY8 P3	1	0.6118	0.3882	0.09691	3	3	5.665	300		NY15 P1 vs. NY15 P3	1	2.825	-1.825	0.5484	3	3	4.706	300
NY8 P2 vs. NY8 P3	2.826	0.6118	2.214	0.09691	3	3	32.31	300		NY15 P2 vs. NY15 P3	5.242	2.825	2.417	0.5484	3	3	6.234	300
HIST1H1D										HIST1H1D
NY8 P1 vs. NY8 P2	1	2.67	-1.67	0.09691	3	3	24.37	300		NY15 P1 vs. NY15 P2	1	2.316	-1.316	0.5484	3	3	3.394	300
NY8 P1 vs. NY8 P3	1	0.0032	0.9968	0.09691	3	3	14.55	300		NY15 P1 vs. NY15 P3	1	0.3426	0.6574	0.5484	3	3	1.695	300
NY8 P2 vs. NY8 P3	2.67	0.0032	2.667	0.09691	3	3	38.91	300		NY15 P2 vs. NY15 P3	2.316	0.3426	1.974	0.5484	3	3	5.09	300
HNF1A										HNF1A
NY8 P1 vs. NY8 P2	1	2.912	-1.912	0.09691	3	3	27.9	300		NY15 P1 vs. NY15 P2	1	5.242	-4.242	0.5484	3	3	10.94	300
NY8 P1 vs. NY8 P3	1	0.3234	0.6766	0.09691	3	3	9.872	300		NY15 P1 vs. NY15 P3	1	3.315	-2.315	0.5484	3	3	5.971	300
NY8 P2 vs. NY8 P3	2.912	0.3234	2.588	0.09691	3	3	37.77	300		NY15 P2 vs. NY15 P3	5.242	3.315	1.927	0.5484	3	3	4.969	300
HNF4A										HNF4A
NY8 P1 vs. NY8 P2	1	4.923	-3.923	0.09691	3	3	57.24	300		NY15 P1 vs. NY15 P2	1	31.77	-30.77	0.5484	3	3	79.35	300
NY8 P1 vs. NY8 P3	1	0.3216	0.6784	0.09691	3	3	9.9	300		NY15 P1 vs. NY15 P3	1	19.96	-18.96	0.5484	3	3	48.9	300
NY8 P2 vs. NY8 P3	4.923	0.3216	4.601	0.09691	3	3	67.14	300		NY15 P2 vs. NY15 P3	31.77	19.96	11.81	0.5484	3	3	30.45	300
HSPG2										HSPG2
NY8 P1 vs. NY8 P2	1	2.796	-1.796	0.09691	3	3	26.21	300		NY15 P1 vs. NY15 P2	1	5.204	-4.204	0.5484	3	3	10.84	300
NY8 P1 vs. NY8 P3	1	0.1528	0.8472	0.09691	3	3	12.36	300		NY15 P1 vs. NY15 P3	1	2.189	-1.189	0.5484	3	3	3.065	300
NY8 P2 vs. NY8 P3	2.796	0.1528	2.643	0.09691	3	3	38.57	300		NY15 P2 vs. NY15 P3	5.204	2.189	3.016	0.5484	3	3	7.777	300
HTR1B										HTR1B
NY8 P1 vs. NY8 P2	1	3.419	-2.419	0.09691	3	3	35.3	300		NY15 P1 vs. NY15 P2	1	4.472	-3.472	0.5484	3	3	8.954	300
NY8 P1 vs. NY8 P3	1	0.2119	0.7881	0.09691	3	3	11.5	300		NY15 P1 vs. NY15 P3	1	2.168	-1.168	0.5484	3	3	3.012	300
NY8 P2 vs. NY8 P3	3.419	0.2119	3.207	0.09691	3	3	46.8	300		NY15 P2 vs. NY15 P3	4.472	2.168	2.304	0.5484	3	3	5.941	300
HTR1D										HTR1D
NY8 P1 vs. NY8 P2	1	2.989	-1.989	0.09691	3	3	29.02	300		NY15 P1 vs. NY15 P2	1	8.313	-7.313	0.5484	3	3	18.86	300
NY8 P1 vs. NY8 P3	1	1.596	-0.5961	0.09691	3	3	8.699	300		NY15 P1 vs. NY15 P3	1	3.121	-2.121	0.5484	3	3	5.47	300
NY8 P2 vs. NY8 P3	2.989	1.596	1.393	0.09691	3	3	20.32	300		NY15 P2 vs. NY15 P3	8.313	3.121	5.191	0.5484	3	3	13.39	300
IGFBP1										IGFBP1
NY8 P1 vs. NY8 P2	1	1.828	-0.8283	0.09691	3	3	12.09	300		NY15 P1 vs. NY15 P2	1	7.967	-6.967	0.5484	3	3	17.97	300
NY8 P1 vs. NY8 P3	1	0.001832	0.9982	0.09691	3	3	14.57	300		NY15 P1 vs. NY15 P3	1	2.748	-1.748	0.5484	3	3	4.508	300
NY8 P2 vs. NY8 P3	1.828	0.001832	1.826	0.09691	3	3	26.65	300		NY15 P2 vs. NY15 P3	7.967	2.748	5.219	0.5484	3	3	13.46	300
JPH1										JPH1
NY8 P1 vs. NY8 P2	1	4.481	-3.481	0.09691	3	3	50.8	300		NY15 P1 vs. NY15 P2	1	11.16	-10.16	0.5484	3	3	26.2	300
NY8 P1 vs. NY8 P3	1	0.0477	0.9523	0.09691	3	3	13.9	300		NY15 P1 vs. NY15 P3	1	5.618	-4.618	0.5484	3	3	11.91	300
NY8 P2 vs. NY8 P3	4.481	0.0477	4.434	0.09691	3	3	64.7	300		NY15 P2 vs. NY15 P3	11.16	5.618	5.543	0.5484	3	3	14.29	300
LGR5										LGR5
NY8 P1 vs. NY8 P2	1	1.914	-0.914	0.09691	3	3	13.34	300		NY15 P1 vs. NY15 P2	1	3.851	-2.851	0.5484	3	3	7.351	300
NY8 P1 vs. NY8 P3	1	0.1151	0.8849	0.09691	3	3	12.91	300		NY15 P1 vs. NY15 P3	1	2.398	-1.398	0.5484	3	3	3.605	300
NY8 P2 vs. NY8 P3	1.914	0.1151	1.799	0.09691	3	3	26.25	300		NY15 P2 vs. NY15 P3	3.851	2.398	1.453	0.5484	3	3	3.746	300
LIMK2										LIMK2
NY8 P1 vs. NY8 P2	1	1.946	-0.9464	0.09691	3	3	13.81	300		NY15 P1 vs. NY15 P2	1	3.082	-2.082	0.5484	3	3	5.369	300
NY8 P1 vs. NY8 P3	1	0.5844	0.4156	0.09691	3	3	6.065	300		NY15 P1 vs. NY15 P3	1	1.379	-0.3788	0.5484	3	3	0.9769	300
NY8 P2 vs. NY8 P3	1.946	0.5844	1.362	0.09691	3	3	19.88	300		NY15 P2 vs. NY15 P3	3.082	1.379	1.703	0.5484	3	3	4.392	300
NID1										NID1
NY8 P1 vs. NY8 P2	1	2.343	-1.343	0.09691	3	3	19.6	300		NY15 P1 vs. NY15 P2	1	3.544	-2.544	0.5484	3	3	6.561	300
NY8 P1 vs. NY8 P3	1	0.03027	0.9697	0.09691	3	3	14.15	300		NY15 P1 vs. NY15 P3	1	0.8269	0.1731	0.5484	3	3	0.4463	300
NY8 P2 vs. NY8 P3	2.343	0.03027	2.313	0.09691	3	3	33.75	300		NY15 P2 vs. NY15 P3	3.544	0.8269	2.717	0.5484	3	3	7.007	300
NMUR2										NMUR2
NY8 P1 vs. NY8 P2	1	6.817	-5.817	0.09691	3	3	84.89	300		NY15 P1 vs. NY15 P2	1	52.44	-51.44	0.5484	3	3	132.7	300
NY8 P1 vs. NY8 P3	1	0.4606	0.5394	0.09691	3	3	7.872	300		NY15 P1 vs. NY15 P3	1	28.26	-27.26	0.5484	3	3	70.3	300
NY8 P2 vs. NY8 P3	6.817	0.4606	6.357	0.09691	3	3	92.76	300		NY15 P2 vs. NY15 P3	52.44	28.26	24.18	0.5484	3	3	62.36	300
NR0B2										NR0B2
NY8 P1 vs. NY8 P2	1	6.038	-5.038	0.09691	3	3	73.51	300		NY15 P1 vs. NY15 P2	1	15.18	-14.18	0.5484	3	3	36.58	300
NY8 P1 vs. NY8 P3	1	0.00517	0.9948	0.09691	3	3	14.52	300		NY15 P1 vs. NY15 P3	1	4.771	-3.771	0.5484	3	3	9.724	300
NY8 P2 vs. NY8 P3	6.038	0.00517	6.032	0.09691	3	3	88.03	300		NY15 P2 vs. NY15 P3	15.18	4.771	10.41	0.5484	3	3	26.85	300
NR5A2										NR5A2
NY8 P1 vs. NY8 P2	1	1.945	-0.9449	0.09691	3	3	13.79	300		NY15 P1 vs. NY15 P2	1	3.758	-2.758	0.5484	3	3	7.113	300
NY8 P1 vs. NY8 P3	1	0.0168	0.9832	0.09691	3	3	14.35	300		NY15 P1 vs. NY15 P3	1	1.591	-0.5906	0.5484	3	3	1.523	300
NY8 P2 vs. NY8 P3	1.945	0.0168	1.928	0.09691	3	3	28.14	300		NY15 P2 vs. NY15 P3	3.758	1.591	2.168	0.5484	3	3	5.59	300
RCSD1										RCSD1
NY8 P1 vs. NY8 P2	1	1.694	-0.6942	0.09691	3	3	10.13	300		NY15 P1 vs. NY15 P2	1	7.846	-6.846	0.5484	3	3	17.65	300
NY8 P1 vs. NY8 P3	1	0.003353	0.9966	0.09691	3	3	14.54	300		NY15 P1 vs. NY15 P3	1	0.8507	0.1493	0.5484	3	3	0.385	300
NY8 P2 vs. NY8 P3	1.694	0.003353	1.691	0.09691	3	3	24.67	300		NY15 P2 vs. NY15 P3	7.846	0.8507	6.996	0.5484	3	3	18.04	300
RGS17										RGS17
NY8 P1 vs. NY8 P2	1	2.195	-1.195	0.09691	3	3	17.43	300		NY15 P1 vs. NY15 P2	1	7.836	-6.836	0.5484	3	3	17.63	300
NY8 P1 vs. NY8 P3	1	0.09493	0.9051	0.09691	3	3	13.21	300		NY15 P1 vs. NY15 P3	1	3.695	-2.695	0.5484	3	3	6.949	300
NY8 P2 vs. NY8 P3	2.195	0.09493	2.1	0.09691	3	3	30.64	300		NY15 P2 vs. NY15 P3	7.836	3.695	4.141	0.5484	3	3	10.68	300
SAMD5										SAMD5
NY8 P1 vs. NY8 P2	1	2.06	-1.06	0.09691	3	3	15.47	300		NY15 P1 vs. NY15 P2	1	2.532	-1.532	0.5484	3	3	3.951	300
NY8 P1 vs. NY8 P3	1	0.0274	0.9726	0.09691	3	3	14.19	300		NY15 P1 vs. NY15 P3	1	1.222	-0.2222	0.5484	3	3	0.573	300
NY8 P2 vs. NY8 P3	2.06	0.0274	2.033	0.09691	3	3	29.66	300		NY15 P2 vs. NY15 P3	2.532	1.222	1.31	0.5484	3	3	3.378	300
SLC15A1										SLC15A1
NY8 P1 vs. NY8 P2	1	4.144	-3.144	0.09691	3	3	45.88	300		NY15 P1 vs. NY15 P2	1	27.56	-26.56	0.5484	3	3	68.48	300
NY8 P1 vs. NY8 P3	1	0.006217	0.9938	0.09691	3	3	14.5	300		NY15 P1 vs. NY15 P3	1	7.379	-6.379	0.5484	3	3	16.45	300
NY8 P2 vs. NY8 P3	4.144	0.006217	4.138	0.09691	3	3	60.38	300		NY15 P2 vs. NY15 P3	27.56	7.379	20.18	0.5484	3	3	52.03	300
SLC38A1										SLC38A1
NY8 P1 vs. NY8 P2	1	1.512	-0.5116	0.09691	3	3	7.465	300		NY15 P1 vs. NY15 P2	1	2.306	-1.306	0.5484	3	3	3.367	300
NY8 P1 vs. NY8 P3	1	0.002111	0.9979	0.09691	3	3	14.56	300		NY15 P1 vs. NY15 P3	1	0.7461	0.2539	0.5484	3	3	0.6548	300
NY8 P2 vs. NY8 P3	1.512	0.002111	1.509	0.09691	3	3	22.03	300		NY15 P2 vs. NY15 P3	2.306	0.7461	1.56	0.5484	3	3	4.022	300
SLC4A11										SLC4A11
NY8 P1 vs. NY8 P2	1	2.63	-1.63	0.09691	3	3	23.78	300		NY15 P1 vs. NY15 P2	1	6.803	-5.803	0.5484	3	3	14.97	300
NY8 P1 vs. NY8 P3	1	0.6437	0.3563	0.09691	3	3	5.199	300		NY15 P1 vs. NY15 P3	1	3.693	-2.693	0.5484	3	3	6.944	300
NY8 P2 vs. NY8 P3	2.63	0.6437	1.986	0.09691	3	3	28.98	300		NY15 P2 vs. NY15 P3	6.803	3.693	3.11	0.5484	3	3	8.021	300
SLCO1C1										SLCO1C1
NY8 P1 vs. NY8 P2	1	1.954	-0.954	0.09691	3	3	13.92	300		NY15 P1 vs. NY15 P2	1	2.678	-1.678	0.5484	3	3	4.327	300
NY8 P1 vs. NY8 P3	1	0.3639	0.6361	0.09691	3	3	9.282	300		NY15 P1 vs. NY15 P3	1	0.7341	0.2659	0.5484	3	3	0.6857	300
NY8 P2 vs. NY8 P3	1.954	0.3639	1.59	0.09691	3	3	23.2	300		NY15 P2 vs. NY15 P3	2.678	0.7341	1.944	0.5484	3	3	5.012	300
SLFN13										SLFN13
NY8 P1 vs. NY8 P2	1	3.772	-2.772	0.09691	3	3	40.45	300		NY15 P1 vs. NY15 P2	1	5.163	-4.163	0.5484	3	3	10.73	300
NY8 P1 vs. NY8 P3	1	0.005031	0.995	0.09691	3	3	14.52	300		NY15 P1 vs. NY15 P3	1	2.032	-1.032	0.5484	3	3	2.661	300
NY8 P2 vs. NY8 P3	3.772	0.005031	3.767	0.09691	3	3	54.97	300		NY15 P2 vs. NY15 P3	5.163	2.032	3.131	0.5484	3	3	8.073	300
TBC1D9										TBC1D9
NY8 P1 vs. NY8 P2	1	1.81	-0.81	0.09691	3	3	11.82	300		NY15 P1 vs. NY15 P2	1	2.899	-1.899	0.5484	3	3	4.897	300
NY8 P1 vs. NY8 P3	1	0.2034	0.7966	0.09691	3	3	11.62	300		NY15 P1 vs. NY15 P3	1	1.6	-0.6	0.5484	3	3	1.547	300
NY8 P2 vs. NY8 P3	1.81	0.2034	1.607	0.09691	3	3	23.44	300		NY15 P2 vs. NY15 P3	2.899	1.6	1.299	0.5484	3	3	3.35	300
TESC										TESC
NY8 P1 vs. NY8 P2	1	5.062	-4.062	0.09691	3	3	59.27	300		NY15 P1 vs. NY15 P2	1	39.66	-38.66	0.5484	3	3	99.7	300
NY8 P1 vs. NY8 P3	1	0.1446	0.8554	0.09691	3	3	12.48	300		NY15 P1 vs. NY15 P3	1	27.18	-26.18	0.5484	3	3	67.52	300
NY8 P2 vs. NY8 P3	5.062	0.1446	4.917	0.09691	3	3	71.75	300		NY15 P2 vs. NY15 P3	39.66	27.18	12.48	0.5484	3	3	32.18	300
TMPO										TMPO
NY8 P1 vs. NY8 P2	1	1.78	-0.78	0.09691	3	3	11.38	300		NY15 P1 vs. NY15 P2	1	2.297	-1.297	0.5484	3	3	3.344	300
NY8 P1 vs. NY8 P3	1	0.7857	0.2143	0.09691	3	3	3.127	300		NY15 P1 vs. NY15 P3	1	0.8318	0.1682	0.5484	3	3	0.4337	300
NY8 P2 vs. NY8 P3	1.78	0.7857	0.9943	0.09691	3	3	14.51	300		NY15 P2 vs. NY15 P3	2.297	0.8318	1.465	0.5484	3	3	3.778	300
TTLL6										TTLL6
NY8 P1 vs. NY8 P2	1	4.445	-3.445	0.09691	3	3	50.27	300		NY15 P1 vs. NY15 P2	1	13.36	-12.36	0.5484	3	3	31.87	300
NY8 P1 vs. NY8 P3	1	0.2453	0.7547	0.09691	3	3	11.01	300		NY15 P1 vs. NY15 P3	1	8.493	-7.493	0.5484	3	3	19.32	300
NY8 P2 vs. NY8 P3	4.445	0.2453	4.2	0.09691	3	3	61.29	300		NY15 P2 vs. NY15 P3	13.36	8.493	4.864	0.5484	3	3	12.54	300
WNK4										WNK4
NY8 P1 vs. NY8 P2	1	4.102	-3.102	0.09691	3	3	45.27	300		NY15 P1 vs. NY15 P2	1	9.638	-8.638	0.5484	3	3	22.28	300
NY8 P1 vs. NY8 P3	1	0.2835	0.7165	0.09691	3	3	10.46	300		NY15 P1 vs. NY15 P3	1	3.65	-2.65	0.5484	3	3	6.833	300
NY8 P2 vs. NY8 P3	4.102	0.2835	3.819	0.09691	3	3	55.72	300		NY15 P2 vs. NY15 P3	9.638	3.65	5.989	0.5484	3	3	15.44	300
ZNF438										ZNF438
NY8 P1 vs. NY8 P2	1	2.12	-1.12	0.09691	3	3	16.34	300		NY15 P1 vs. NY15 P2	1	2.781	-1.781	0.5484	3	3	4.593	300
NY8 P1 vs. NY8 P3	1	0.06277	0.9372	0.09691	3	3	13.68	300		NY15 P1 vs. NY15 P3	1	1.337	-0.3374	0.5484	3	3	0.87	300
NY8 P2 vs. NY8 P3	2.12	0.06277	2.057	0.09691	3	3	30.02	300		NY15 P2 vs. NY15 P3	2.781	1.337	1.444	0.5484	3	3	3.723	300

## Sheet: Figure 1F
NY8 P1	NY8 P2	NY8 P3	NY15 P1	NY15 P2	NY15 P3
0.84	2.808	0.3138	0.984	5	3.26
1	2.91167	0.32345	1.074	5.05	3.34
1.16	3.01354	0.3331	1.02	5.67	3.387
