# Supplementary material for: HNF1A is a novel oncogene that regulates human pancreatic cancer stem cell properties
Source: eLife. 2018 Aug 3;7:e33947. doi: 10.7554/eLife.33947 (PMC6122955; doi:10.7554/eLife.33947)
Supplement: Figure 1—source data 2. [file elife-33947-fig1-data2.xlsx]

## Sheet: Figure 1-figure supplement 2E,F
Supplemental Figure 2E
	Adherent	Spheres
GFP Negative	53.66	37.94
GFP Low	43.91	56.92
GFP High	2.43	5.14
	Adherent	Spheres
GFP Negative	54.82	38.35
GFP Low	42.82	56.55
GFP High	2.36	5.1
	Adherent	Spheres
GFP Negative	59.58	35.02
GFP Low	39.82	58.86
GFP High	0.6	6.12
	Adherent	Spheres
GFP Negative	56.02	37.1033
GFP Low	42.1833	57.4433
GFP High	1.79667	5.45333
	Adherent	Spheres
GFP Negative	1.81122	1.04837
GFP Low	1.22284	0.716341
GFP High	0.598674	0.333533
Adherent GFP Negative	Spheres GFP Negative	Adherent GFP Low	Spheres GFP Low	Adherent GFP High	Spheres GFP High
53.66	37.94	43.91	56.92	2.43	5.14
54.82	38.35	42.82	56.55	2.36	5.1
59.58	35.02	39.82	58.86	0.6	6.12
Supplemental Figure 2F
	Adherent	Spheres			Adherent	Spheres
GFP+/CD44+/EPCAM+#1	8.58	16.1		GFP+/CD44+/CD24+#1	7.62	15.45
	Adherent	Spheres			Adherent	Spheres
GFP+/CD44+/EPCAM+#2	9.2	18.3		GFP+/CD44+/CD24+#2	8.02	16.8
	Adherent	Spheres			Adherent	Spheres
GFP+/CD44+/EPCAM+#3				GFP+/CD44+/CD24+#3	7.5	15.63
	8.65	17.53
								Average	Adherent	Spheres
Average	Adherent	Spheres		Average	Adherent	Spheres		GFP+/CD44+/EPCAM+	8.89	17.2
GFP+/CD44+/EPCAM+#3	8.89	17.2		GFP+/CD44+/CD24+#3	7.71333	15.96		GFP+/CD44+/CD24+	7.71333	15.96
								SEM
SEM	Adherent	Spheres		SEM	Adherent	Spheres		GFP+/CD44+/EPCAM+	0.253114	0.898146
GFP+/CD44+/EPCAM+#3	0.253114	0.898146		GFP+/CD44+/EPCAM+#3	0.157198	0.423202		GFP+/CD44+/CD24+	0.157198	0.423202
