# Supplementary material for: HNF1A is a novel oncogene that regulates human pancreatic cancer stem cell properties
Source: eLife. 2018 Aug 3;7:e33947. doi: 10.7554/eLife.33947 (PMC6122955; doi:10.7554/eLife.33947)
Supplement: Figure 2—source data 1. [file elife-33947-fig2-data1.xlsx]

## Sheet: Figure 2C
NY5 Day 3 Ctl	NY5 Day 3 H1	NY5 Day 3 H2	NY5 Day 6 Ctl	NY5 Day 6 H1	NY5 Day 6 H2	NY8 Day 3 Ctl	NY8 Day 3 H1	NY8 Day 3 H2	NY8 Day 6 Ctl	NY8 Day 6 H1	NY8 Day 6 H2	NY15 Day 3 Ctl	NY15 Day 3 H1	NY15 Day 3 H2	NY15 Day 6 Ctl	NY15 Day 6 H1	NY15 Day 6 H2
100	43.5	51.1	100	17.1	22.4	390000	150000	140000	1020000	200000	60000	100	30.1	34.4	100	10.4	35.6
100	37.8	55.5	100	8.44	20.9	410000	130000	210000	960000	180000	220000	100	49.6	66.7	100	26	58.1
100	45.3	38.7	100	10.1	14.7	340000	160000	110000	1640000	140000	120000	100	53.7	54.4	100	27.8	36.3
												100	26.7	61.6	100	10.2	16.3

## Sheet: Figure 2D
NY5 Ctl Viable	NY5 HNF1A#1 Viable	NY5 HNF1A#2 Viable	NY5 Ctl Annexin V+	NY5 HNF1A#1 Annexin V+	NY5 HNF1A#2 Annexin V+	NY5 Ctl Necrotic	NY5 HNF1A#1 Necrotic	NY5 HNF1A#2 Necrotic	NY8 Ctl Viable	NY8 HNF1A#1 Viable	NY8 HNF1A#2 Viable	NY8 Ctl Annexin V+	NY8 HNF1A#1 Annexin V+	NY8 HNF1A#2 Annexin V+	NY8 Ctl Necrotic	NY8 HNF1A#1 Necrotic	NY8 HNF1A#2 Necrotic	NY15 Ctl Viable	NY15 HNF1A#1 Viable	NY15 HNF1A#2 Viable	NY15 Ctl Annexin V+	NY15 HNF1A#1 Annexin V+	NY15 HNF1A#2 Annexin V+	NY15 Ctl Necrotic	NY15 HNF1A#1 Necrotic	NY15 HNF1A#2 Necrotic
80.9	54.24	49.34	16.25	39.08	44.81	2.85	6.67	5.85	78.58	49.78	41.99	17.52	43.1	51.82	3.9	7.12	6.18	74.47	60.99	37.1	21.75	33.94	54.23	3.78	5.07	8.66
81.58	56.71	55.62	13.9	37.67	38.97	4.51	5.62	5.42	85.07	67.79	65.54	8.92	28.14	29.76	6.01	4.07	4.7	74.03	55.68	44.71	20.31	39.06	48.13	5.66	5.27	7.16
78.18	56.94	67.67	16.32	38.29	28	5.5	4.77	4.33	75.18	47.92	57.05	18.85	47.37	37.97	5.97	4.71	4.98	66.16	37.26	33.74	29.07	59.27	62.76	4.77	3.47	3.5
84.88	64.6	70.19	13.1	32.44	26.37	2.02	2.96	3.44	79.7	51.99	65.23	18.25	45.47	31.27	2.05	2.54	3.5	70.94	56.16	51.81	22.83	39.32	44.45	6.23	4.53	3.75
