# Supplementary material for: HNF1A is a novel oncogene that regulates human pancreatic cancer stem cell properties
Source: eLife. 2018 Aug 3;7:e33947. doi: 10.7554/eLife.33947 (PMC6122955; doi:10.7554/eLife.33947)
Supplement: Figure 2—source data 2. [file elife-33947-fig2-data2.xlsx]

## Sheet: Figure 2-figure supplement 1A
HPNE	HPDE	Capan-2	HPAF-II	BxPC-3	AsPC-1	MiaPaca-2	Panc-1	NY1	NY2	NY3	NY5	NY6	NY8	NY9	NY12	NY15	NY16	NY17	NY19	NY28	NY32	NY53
1	1.10803	1.59881	62.1637	2.79142	18.3548	1.90792	2.23612	7.85167	9.61309	2.29262	15.3908	11.5595	14.6416	15.1895	7.42299	16.1897	5.30003	16.6448	2.63902	28.2465	10.4179	1.65749
1.06142	0.925305	1.87254	59.5901	3.15798	20.8119	1.99585	1.86995	6.62996	9.57983	2.21453	13.4078	12.261	14.3204	14.45	7.57896	16.1336	4.70763	15.4657	2.89989	29.3238	9.27919	1.69114
0.93045	0.756284	1.70409	61.9486	2.77214	18.1712	1.84549	1.75686	6.1135	8.55045	2.00973	14.7332	11.3845	13.6044	13.4543	6.85426	14.9389	5.00025	13.6611	2.73019	31.2764	8.97555	1.59438
Number of families	1
Number of comparisons per family	29
Alpha	0.05
Dunnett's multiple comparisons test	Mean Diff.	95.00% CI of diff.	Significant?	Summary	Adjusted P Value	A-?
HPNE vs. HPDE	0.06742	-2.906 to 3.041	No	ns	>0.9999	B	HPDE
HPNE vs. Capan-2	-0.7279	-3.702 to 2.246	No	ns	0.9989	C	Capan-2
HPNE vs. HPAF-II	-60.24	-63.21 to -57.26	Yes	****	<0.0001	D	HPAF-II
HPNE vs. BxPC-3	-1.91	-4.884 to 1.064	No	ns	0.4863	E	BxPC-3
HPNE vs. AsPC-1	-18.12	-21.09 to -15.14	Yes	****	<0.0001	F	AsPC-1
HPNE vs. MiaPaca-2	-0.9191	-3.893 to 2.055	No	ns	0.9941	G	MiaPaca-2
HPNE vs. Panc-1	-0.957	-3.931 to 2.017	No	ns	0.9936	H	Panc-1
HPNE vs. NY1	-5.868	-8.841 to -2.894	Yes	****	<0.0001	I	NY1
HPNE vs. NY2	-8.25	-11.22 to -5.277	Yes	****	<0.0001	J	NY2
HPNE vs. NY3	-1.175	-4.149 to 1.799	No	ns	0.9686	K	NY3
HPNE vs. NY5	-13.51	-16.49 to -10.54	Yes	****	<0.0001	L	NY5
HPNE vs. NY6	-10.74	-13.71 to -7.764	Yes	****	<0.0001	M	NY6
HPNE vs. NY8	-13.19	-16.17 to -10.22	Yes	****	<0.0001	N	NY8
HPNE vs. NY9	-13.37	-16.34 to -10.39	Yes	****	<0.0001	O	NY9
HPNE vs. NY12	-6.288	-9.262 to -3.314	Yes	****	<0.0001	P	NY12
HPNE vs. NY15	-14.76	-17.73 to -11.78	Yes	****	<0.0001	Q	NY15
HPNE vs. NY16	-4.005	-6.979 to -1.032	Yes	**	0.0022	R	NY16
HPNE vs. NY17	-14.26	-17.23 to -11.29	Yes	****	<0.0001	S	NY17
HPNE vs. NY19	-1.759	-4.733 to 1.215	No	ns	0.6045	T	NY19
HPNE vs. NY28	-28.62	-31.59 to -25.64	Yes	****	<0.0001	U	NY28
HPNE vs. NY32	-8.56	-11.53 to -5.587	Yes	****	<0.0001	V	NY32
HPNE vs. NY53	-0.6504	-3.624 to 2.323	No	ns	0.999	W	NY53
Test details	Mean 1	Mean 2	Mean Diff.	SE of diff.	n1	n2	q	DF
HPNE vs. HPDE	0.9973	0.9299	0.06742	0.9571	3	3	0.07044	60
HPNE vs. Capan-2	0.9973	1.725	-0.7279	0.9571	3	3	0.7605	60
HPNE vs. HPAF-II	0.9973	61.23	-60.24	0.9571	3	3	62.94	60
HPNE vs. BxPC-3	0.9973	2.907	-1.91	0.9571	3	3	1.996	60
HPNE vs. AsPC-1	0.9973	19.11	-18.12	0.9571	3	3	18.93	60
HPNE vs. MiaPaca-2	0.9973	1.916	-0.9191	0.9571	3	3	0.9604	60
HPNE vs. Panc-1	0.9973	1.954	-0.957	0.9571	3	3	1	60
HPNE vs. NY1	0.9973	6.865	-5.868	0.9571	3	3	6.131	60
HPNE vs. NY2	0.9973	9.248	-8.25	0.9571	3	3	8.621	60
HPNE vs. NY3	0.9973	2.172	-1.175	0.9571	3	3	1.228	60
HPNE vs. NY5	0.9973	14.51	-13.51	0.9571	3	3	14.12	60
HPNE vs. NY6	0.9973	11.73	-10.74	0.9571	3	3	11.22	60
HPNE vs. NY8	0.9973	14.19	-13.19	0.9571	3	3	13.78	60
HPNE vs. NY9	0.9973	14.36	-13.37	0.9571	3	3	13.97	60
HPNE vs. NY12	0.9973	7.285	-6.288	0.9571	3	3	6.57	60
HPNE vs. NY15	0.9973	15.75	-14.76	0.9571	3	3	15.42	60
HPNE vs. NY16	0.9973	5.003	-4.005	0.9571	3	3	4.185	60
HPNE vs. NY17	0.9973	15.26	-14.26	0.9571	3	3	14.9	60
HPNE vs. NY19	0.9973	2.756	-1.759	0.9571	3	3	1.838	60
HPNE vs. NY28	0.9973	29.62	-28.62	0.9571	3	3	29.9	60
HPNE vs. NY32	0.9973	9.558	-8.56	0.9571	3	3	8.944	60
HPNE vs. NY53	0.9973	1.648	-0.6504	0.9571	3	3	0.6796	60

## Sheet: Figure 2-figure supplement 1C
Normal Ducts	PDA	Normal Ducts	PDA	Normal Ducts	PDA
1	1	5	90	5	90
1	1	10	90	10	90
1	0	10	0	10	0
1	1	60	60	60	60
1	1	60	80	60	80
1	1	20	90	20	90
1	0	20	0	20	0
1	2	20	90	20	180
1	1	60	90	60	90
1	2	20	60	20	120
1	1	70	90	70	90
1	2	10	60	10	120
0	1	0	80	0	80
1	2	80	70	80	140
1	1	30	100	30	100
1	2	5	80	5	160
1	2	60	80	60	160
1	1	5	80	5	80
	2		90		180
	1		20		20
	3		80		240
	1		2		2
	1		90		90
	1		100		100
	1		100		100
	1		10		10
	1		10		10
	1		20		20
	2		40		80
	1		5		5
	1		80		80
	0		0		0
	2		80		160
	2		80		160
	1		30		30
	1		80		80
	1		100		100
	0		0		0
	1		5		5
	2		60		120
	1		30		30
