# Supplementary material for: HNF1A is a novel oncogene that regulates human pancreatic cancer stem cell properties
Source: eLife. 2018 Aug 3;7:e33947. doi: 10.7554/eLife.33947 (PMC6122955; doi:10.7554/eLife.33947)
Supplement: Figure 3—source data 1. [file elife-33947-fig3-data1.xlsx]

## Sheet: Figure 3A
NY5 Ctl	NY5 HNF1A#1	NY5 HNF1A#2	NY8 Ctl	NY8 HNF1A#1	NY8 HNF1A#2	NY15 Ctl	NY15 HNF1A#1	NY15 HNF1A#2
27.5	10.8	13.5	10.2	2.8	2.4	18.4	6.8	4.8
26.04	10.61	12.19	10.44	2.72	2.09	16.41	7.32	4.9
30.02	11.28	8.2	12.62	3.07	4.03	16.14	4.98	4.8

## Sheet: Figure 3B
NY5 Ctl	NY5 H1	NY5 H2	NY8 Ctl	NY8 H1	NY8 H2	NY15 Ctl	NY15 H1	NY15 H2
65.23	25.12	33.75	7.3	4	3.92	10.13	2.8	7.02
73.51	29.19	46.67	12.37	5.89	4.45	5.36	1.64	3.24
82.27	14.05	50.26	14.22	7.7	7.76	11.05	3.42	4.26
88.86	29.52	57.08	7.73	1.74	0.67	7.64	1.85	2.56

## Sheet: Figure 3E
NY5 LacZ2.1	NY5 H1	NY5 H2	NY8 LacZ2.1	NY8 H1	NY8 H2	NY15 LacZ2.1	NY15 H1	NY15 H2
24	5	9	35	11	10	20	12	14
24	7	10	42	10	7	25	12	13
32	8	11	32	4	4	30	14	12
