# Supplementary material for: HNF1A is a novel oncogene that regulates human pancreatic cancer stem cell properties
Source: eLife. 2018 Aug 3;7:e33947. doi: 10.7554/eLife.33947 (PMC6122955; doi:10.7554/eLife.33947)
Supplement: Figure 4—source data 1. [file elife-33947-fig4-data1.xlsx]

## Sheet: Figure 4D
NY15	NY15	NY15	NY15	NY8	NY8	NY8	NY8	NY53	NY53	NY53	NY53
GFP-Dox	GFP+Dox	HNF1A-Dox	HNF1A+Dox	LacZ - Dox	LacZ + Dox	HNF1A - Dox	HNF1A + Dox	LacZ - Dox	LacZ + Dox	HNF1A - Dox	HNF1A + Dox
1.55	1.64	1.62	19.32	5.39	4.27	3.39	9.78	6.36	3.53	2.92	12.27
1.92	1.78	1.83	31.62	5.2	5.38	3.73	19.67	7.96	5.81	3.65	9.69
4.09	4.53	3.84	28.77	4.99	4.55	3.36	13.89	8.36	7.62	4.62	13.04

## Sheet: Figure 4E
NY15	NY15	NY15	NY15	NY8	NY8	NY8	NY8	NY53	NY53	NY53	NY53
GFP-Dox	GFP+Dox	HNF1A-Dox	HNF1A+Dox	LacZ-Dox	LacZ+Dox	HNF1A-Dox	HNF1A+Dox	LacZ-Dox	LacZ+Dox	HNF1A-Dox	HNF1A+Dox
39	42	34	100	7	6	6	36	11	8	8	17
38	20	28	99	6	3	5	36	17	19	9	32
45	41	30	87	8	6	5	31	12	15	11	26
								18	19	16	34

## Sheet: Figure 4G
LacZ	KRAS	HNF1A	HNF1A+KRAS
8	24	34	33
8	28	29	41
14	32	32	39

## Sheet: Figure 4I
LacZ	LacZ+KRAS	HNF1A	HNF1A+KRAS
12	55.3333	52	199.333
4	34.6667	92.3333	210
3.66667	13.6667	73	160.667
