# Supplementary material for: HNF1A is a novel oncogene that regulates human pancreatic cancer stem cell properties
Source: eLife. 2018 Aug 3;7:e33947. doi: 10.7554/eLife.33947 (PMC6122955; doi:10.7554/eLife.33947)
Supplement: Figure 4—source data 2. [file elife-33947-fig4-data2.xlsx]

## Sheet: Figure 4-figure supplement 1C
CD24/CD44+		HPDE LacZ	HPDE HNF1A	HPNE LacZ	HPNE HNF1A
		38.2	51.1	0.5	83.9
		35.1	54.8	0.8	85.2
		37.06	49.87	0.3	79.8
