# Supplementary material for: HNF1A is a novel oncogene that regulates human pancreatic cancer stem cell properties
Source: eLife. 2018 Aug 3;7:e33947. doi: 10.7554/eLife.33947 (PMC6122955; doi:10.7554/eLife.33947)
Supplement: Figure 5—source data 1. [file elife-33947-fig5-data1.xlsx]

## Sheet: Figure 5B NY5
LacZ2.1	HNF1A#1	HNF1A#2
650	62.5	87.5
351.562	87.5	93.75
1687.5	0.5	13.5
500	600	125
351.562	93.75	125
500	0.5	64.5
125	0.5	750
975	93.75	150
960.938	6

## Sheet: Figure 5B NY15
LacZ2.1	HNF1A#1	HNF1A#2
750	0.5	15.625
1250	40.5	1
147.5	50.5	1.5
375	64	0.5
21	62.5	144.125
333.5	112.5	62.5
654	1	62.5
	1	48
	516	100
		18

## Sheet: Figure 5C
LacZ2.1 Week 6	LacZ2.1 Week 7	LacZ2.1 Week 8	LacZ2.1 Week 9	LacZ2.1 Week 10	LacZ2.1 Week 11	H1 Week 6	H1 Week 7	H1 Week 8	H1 Week 9	H1 Week 10	H1 Week 11	H8 Week 6	H8 Week 7	H8 Week 8	H8 Week 9	H8 Week 10	H8 Week 11
13.5	13.5	13.5	13.5	117.74	274.604	0	0	0	13.5	13.5	13.5	0	0	13.5	13.5	0	0
0	13.5	616.512	1002.91	1856.25	2370.57	0	0	13.5	104.43	274.604	403.082	0	0	0	13.5	13.5	13.5
13.5	347.894	730.174	3214.07	855.562	1096.77	0	0	71.25	181.3	218.489	611.104	0	0	0	13.5	0	13.5
13.5	355.737	13.5	13.5	1172.5	1847.57	0	0	0	13.5	13.5	133.2	0	0	0	0	13.5	0
0	0	388.129	647.149	900.215	912.984	0	0	0	0	0	13.5	0	0	0	0	13.5	0
13.5	63.6265	293.486	705.672	501.642	730.34	0	0	0	0	13.5	13.5	0	0	13.5	0	13.5	0
0	13.5	409.05	648.96	505	5569.65	0	0	0	0	0	13.5	0	0	0	0	13.5	13.5
0	165.528	83.106	306.56	1597.9	3569.74	0	0	0	13.5	91.936	475.154	0	0	0	0	0	13.5
0	13.5	13.5	194.208	991.752	196.992							0	0	0	0	0	13.5
0	13.5	216.562	1106.95	0	6368.04							0	0	0	13.5	71.656	150.822
0	0	114.376	888.096	2063.29								0	13.5	88.938	442.225	780.448	1333.08
13.5	13.5	0	0									0	0	13.5	13.5	13.5	86.022
0	0	525	1980.29									0	0	13.5	0	0	0
13.5	321.726											0	0	13.5	101.124	228.096	216.625

## Sheet: Figure 5E
LacZ2.1	HNF1A#1	HNF1A#2
19.1001	1.28085	4.84566
29.1801	0.276716	4.99084
14.0026	1.15717	5.1309
12.9397	0.554306	6.19576
13.313	6.0735	1.46185
49.945	4.78632	0.731042
	0.401147	6.1363
	0.3087
	0.30969
