# Supplementary material for: HNF1A is a novel oncogene that regulates human pancreatic cancer stem cell properties
Source: eLife. 2018 Aug 3;7:e33947. doi: 10.7554/eLife.33947 (PMC6122955; doi:10.7554/eLife.33947)
Supplement: Figure 5—source data 2. [file elife-33947-fig5-data2.xlsx]

## Sheet: Figure 5-figure supplement 1A
LacZ2.1 Week 1	LacZ2.1 Week 2	LacZ2.1 Week 3	LacZ2.1 Week 4	LacZ2.1 Week 5	LacZ2.1 Week 6	H1 Week 1	H1 Week 2	H1 Week 3	H1 Week 4	H1 Week 5	H1 Week 6	H8 Week 1	H8 Week 2	H8 Week 3	H8 Week 4	H8 Week 5	H8 Week 6
0	0	13.5	36.1415	769.153	700.194	0	0	0	13.5	13.5	57.132	0	0	0	15.75	63.6265	316.894
0	0	13.5	98.315	336.82	571.256	0	0	0	13.5	36.982	67.228	0	0	0	13.5	36.1415	292.494
0	0	13.5	58.212	207.103	580.608	0	0	0	13.5	71.5275	13.5	0	0	0	13.5	13.5	13.5
0	0	13.5	13.5	193.315	466.012	0	0	0	13.5	127.008	81.648	0	0	0	13.5	13.5	13.5
0	0	13.5	32.7015	188.416	706.02	0	0	0	13.5	85.698	13.5	0	0	0	13.5	13.5	56.448
0	0	0	13.5	333.036	497.664	0	0	0	13.5	83.1875	328.738	0	0	0	13.5	13.5	72.03
0	0	0	13.5	373.977	938.975	0	0	0	13.5	61.2255	215.825	0	0	0	31.1805	40.678	61.056
0	0	0	13.5	648.675	1497.38	0	0	0	13.5	13.5	138.6	0	0	0	13.5	67.5	77.5
0	0	0	13.5	173.225	342.4	0	0	0	13.5	74.36	158.4	0	0	0	45.5625	13.5	113.438
0	0	0	13.5	55.016	196.992	0	0	0	13.5	43.4515	192.821	0	0	0	13.5	38.4	26.011
0	0	0	90.944	301.35	662.112	0	0	0	13.5	28.88	222.376	0	0	0	13.5	13.5	175.712
0	0	0	13.5	144.663	363.888	0	0	0	13.5	13.5	187.272	0	0	0	0	13.5	78.416
0	0	0	151.552	193.842	603.432	0	0	0	0	13.5	67.3745	0	0	0	0	13.5	207.831
0	0	0	54.1205	84.096	153.6	0	0	0	0	0	332.838	0	0	0	0	58.19	237.141
0	0	0	45.3005	265.696	508.07	0	0	0	0	0	78.292	0	0	0	0	0	217.8
0	0	0	36.1415	248.832	568.575	0	0	0	0	0	64.512	0	0	0	0	0	27.38
0	0	0	0	231.886	360.855	0	0	0	0	0	13.5	0	0	0	0	0	106.624
0	0	0	0	104.284	210.983	0	0	0	0	0	98.3125
						0	0	0	0	0	58.725
