# Supplementary material for: HNF1A is a novel oncogene that regulates human pancreatic cancer stem cell properties
Source: eLife. 2018 Aug 3;7:e33947. doi: 10.7554/eLife.33947 (PMC6122955; doi:10.7554/eLife.33947)
Supplement: Figure 6—source data 1. [file elife-33947-fig6-data1.xlsx]

## Sheet: Figure 6A,B
NY5 LacZ2.1	NY5 H1	NY5 H8	NY8 LacZ2.1	NY8 H1	NY8 H8	NY15 LacZ2.1	NY15 H1	NY15 H8	NY8 LacZ	NY8 HNF1A	NY15 LacZ	NY15 HNF1A	HPDE LacZ	HPDE HNF1A
1	0.575	0.513	1	0.738	0.549	1	0.703	0.551	1	3.842	1	2.495	1	1.872
1	0.774	0.54	1	0.518	0.647	1	0.731	0.673	1	2.981	1	2.931	1	1.617
1	0.511	0.379	1	0.615	0.628	1	0.706	0.587	1	3.411	1	2.713	1	1.689

## Sheet: Figure 6C
	HNF1A	POU5F1
HPNE	0.997291	1.04352
HPDE	0.929874	2.08584
NY1	6.86504	1.2132
NY2	9.24779	25.1399
NY3	2.78715	1.18456
NY5	14.5106	21.8757
NY6	11.735	14.7226
NY8	14.1888	27.6667
NY9	14.3646	6.78927
NY12	7.2854	3.86175
NY15	15.7541	7.47207
NY16	5.00263	12.3721
NY17	15.2572	3.07817
NY19	2.75637	1.83145
NY28	29.6156	47.9366
NY32	9.55756	7.67315
NY53	1.64767	1.17681
NY59	5.29365	3.45809
NY61	4.46219	0.908621
NY62	3.55022	4.65971
NY64	3.27133	2.01146
NY76	3.56412	7.62366
NY81	37.077	3.05351
NY90	3.34841	1.48566

## Sheet: Figure 6E,G
NY5 Ctl	NY5 HNF1A SP	NY5 OCT4 SP		NY8 Ctl	NY8 HNF1A SP	NY8 OCT4 SP		NY15 Ctl	NY15 OCT4 SP	NY15 OCT4 #5	NY15 OCT4 #6	NY15 OCT4 #9	NY15 OCT4 #10
129	45	50		74	26	9		93	21	7	19	67	5
160	37	61		84	14	6		113	15	5	15	56	5
127	43	59		88	19	7		82	23	4	19	40	9

## Sheet: Figure 6I
NY8 EV/Ctlsi	NY8 EV/HNF1Asi	NY8 OCT4/Ctlsi	NY8 OCT4/HNF1Asi	NY15 EV/Ctlsi	NY15 EV/HNF1Asi	NY15 OCT4/Ctlsi	NY15 OCT4/HNF1Asi
55	25	90	92	114	49	95	93
63	30	88	82	125	62	98	90
66	33	101	104	94	59	81	89
