# Supplementary material for: HNF1A is a novel oncogene that regulates human pancreatic cancer stem cell properties
Source: eLife. 2018 Aug 3;7:e33947. doi: 10.7554/eLife.33947 (PMC6122955; doi:10.7554/eLife.33947)
Supplement: Figure 6—source data 2. [file elife-33947-fig6-data2.xlsx]

## Sheet: Figure 6-figure supplement 1B
NY5#1										MYOD	DE	HS1	HS2	HS3			MYOD	DE	HS1	HS2	HS3			MYOD	DE	HS1	HS2	HS3
Ct values	MYOD	DE	HS1	HS2	HS3				IgG	0.00625815	0.00504594	0.00777562	0.0395685	0.0225588			0.00553712	0.00462833	0.00654147	0.0199772	0.0119288			0.0194567	0.00638686	0.00905734	0.0338563	0.0163668
2% Input	26.5756	27.6315	19.312	27.0645	25.2085				HNF1A	0.00890796	0.0165669	0.0413189	0.294258	0.170394			0.0138787	0.0155531	0.0461668	0.12666	0.0801562			0.0273244	0.0165213	0.09586	0.205919	0.0885666
IgG	34.7909	36.5555	27.6599	34.2748	33.5299
HNF1A	33.7575	34.7782	24.8924	29.6093	28.3799					MYOD	DE	HS1	HS2	HS3			MYOD	DE	HS1	HS2	HS3			MYOD	DE	HS1	HS2	HS3
									IgG	0.00151176	0.00187376	0.00149447	0.0261884	0.010363			0.000977466	0.000478932	0.000165812	0.000620205	0.00101125			0.0112997	0.00153801	0.00246075	0.00165566	0.00219978
Signal relative to input	MYOD	DE	HS1	HS2	HS3				HNF1A	0.00245155	0.00135488	0.000363933	0.0398592	0.0269267			0.0023709	0.00336363	0.00588342	0.00923269	0.00443223			0.00930987	0.00147963	0.0140433	0.0199657	0.00506841
IgG	0.00672957	0.00411759	0.00613817	0.0135048	0.00625203
HNF1A	0.013774	0.0141141	0.0417969	0.342737	0.221999
NY5#2
Ct values	MYOD	DE	HS1	HS2	HS3
2% Input	26.5291	27.8886	19.0875	26.9907	26.7573
IgG	34.389	35.7409	26.6257	34.2279	33.4278
HNF1A	34.921	34.7843	24.7097	30.2068	30.6868
Signal relative to input	MYOD	DE	HS1	HS2	HS3
IgG	0.00860886	0.00865441	0.0107598	0.0132556	0.0196332
HNF1A	0.00595389	0.0167959	0.0406046	0.215213	0.131256
NY5#3
Ct values	MYOD	DE	HS1	HS2	HS3
2% Input	26.7966	27.028	18.863	26.3533	24.9318
IgG	35.9816	36.7514	27.1442	30.7964	30.5125
HNF1A	34.9558	33.7618	24.4518	28.9756	28.5945
Signal relative to input	MYOD	DE	HS1	HS2	HS3
IgG	0.00343602	0.00236582	0.00642884	0.0919452	0.0417911
HNF1A	0.00699599	0.0187907	0.0415553	0.324824	0.157927
	MYOD	DE	HS1	HS2	HS3
IgG	0.00625815	0.00504594	0.00777562	0.0395685	0.0225588
HNF1A	0.00890796	0.0165669	0.0413189	0.294258	0.170394
	MYOD	DE	HS1	HS2	HS3
IgG	0.00261844	0.00324545	0.00258849	0.0453597	0.0179493
HNF1A	0.00424621	0.00234673	0.000630351	0.0690382	0.0466384
	MYOD	DE	HS1	HS2	HS3
IgG	0.00151176	0.00187376	0.00149447	0.0261884	0.010363
HNF1A	0.00245155	0.00135488	0.000363933	0.0398592	0.0269267
NY8#1
Ct values	MYOD	DE	HS1	HS2	HS3
2% Input	23.967	23.6757	16.3118	23.1812	21.4867
IgG	32.972	32.1596	24.6209	29.9191	29.1172
HNF1A	31.7088	30.9529	21.5223	26.9896	26.0424
Signal relative to input	MYOD	DE	HS1	HS2	HS3
IgG	0.00389262	0.00558613	0.0063059	0.0187381	0.0100931
HNF1A	0.00934364	0.0128939	0.0540172	0.142757	0.0850377
NY8#2
Ct values	MYOD	DE	HS1	HS2	HS3
2% Input	25.5933	24.461	16.6977	24.1304	22.2636
IgG	34.1145	33.3772	24.9726	30.7283	29.6311
HNF1A	32.6573	31.8994	22.0244	28.3047	27.0734
Signal relative to input	MYOD	DE	HS1	HS2	HS3
IgG	0.00544392	0.00413989	0.00645711	0.0206467	0.0121114
HNF1A	0.0149467	0.0115312	0.0498327	0.110776	0.0713074
NY8#3
Ct values	MYOD	DE	HS1	HS2	HS3
2% Input	24.5858	23.4183	16.2541	23.1342	21.7527
IgG	32.6886	32.3278	24.4414	29.7392	28.9549
HNF1A	31.4351	29.9094	22.1051	27.1176	26.3241
Signal relative to input	MYOD	DE	HS1	HS2	HS3
IgG	0.00727482	0.00415896	0.0068614	0.0205467	0.0135818
HNF1A	0.0173456	0.0222342	0.0346507	0.126448	0.0841234
	MYOD	DE	HS1	HS2	HS3
IgG	0.00553712	0.00462833	0.00654147	0.0199772	0.0119288
HNF1A	0.0138787	0.0155531	0.0461668	0.12666	0.0801562
	MYOD	DE	HS1	HS2	HS3
IgG	0.00169302	0.000829535	0.000287195	0.00107423	0.00175153
HNF1A	0.00410652	0.00582598	0.0101904	0.0159915	0.00767685
	MYOD	DE	HS1	HS2	HS3
IgG	0.000977466	0.000478932	0.000165812	0.000620205	0.00101125
HNF1A	0.0023709	0.00336363	0.00588342	0.00923269	0.00443223
NY15#1
Ct values	MYOD	DE	HS1	HS2	HS3
2% Input	25.503	24.906	16.9336	24.425	22.391
IgG	33.036	33.138	24.348	30.312	29.695
HNF1A	32.032	32.11	21.4002	27.652	26.822
Signal relative to input	MYOD	DE	HS1	HS2	HS3
IgG	0.0107987	0.00665198	0.0117235	0.0337961	0.0126563
HNF1A	0.0216573	0.0135647	0.0904528	0.213602	0.0927184
NY15#2
Ct values	MYOD	DE	HS1	HS2	HS3
2% Input	25.7405	24.9412	17.0694	24.4144	22.7395
IgG	34.1935	34.0589	25.985	30.1804	29.364
HNF1A	32.8189	31.7284	21.8123	27.9866	27.411
Signal relative to input	MYOD	DE	HS1	HS2	HS3
IgG	0.0057072	0.00360031	0.00414172	0.0367536	0.0202693
HNF1A	0.0147977	0.0181085	0.0746949	0.168142	0.0784821
NY15#3
Ct values	MYOD	DE	HS1	HS2	HS3
2% Input	25.2843	24.9878	16.9189	23.9375	22.154
IgG	30.8624	32.7984	24.3856	29.9482	29.1041
HNF1A	30.7417	31.7924	20.9489	27.0205	26.5575
Signal relative to input	MYOD	DE	HS1	HS2	HS3
IgG	0.0418641	0.0089083	0.0113068	0.0310192	0.0161748
HNF1A	0.0455181	0.0178907	0.122432	0.236012	0.0944993
	MYOD	DE	HS1	HS2	HS3
IgG	0.0194567	0.00638686	0.00905734	0.0338563	0.0163668
HNF1A	0.0273244	0.0165213	0.09586	0.205919	0.0885666
	MYOD	DE	HS1	HS2	HS3
IgG	0.0195717	0.00266391	0.00426215	0.00286769	0.00381012
HNF1A	0.0161252	0.0025628	0.0243237	0.0345816	0.00877874
	MYOD	DE	HS1	HS2	HS3
IgG	0.0112997	0.00153801	0.00246075	0.00165566	0.00219978
HNF1A	0.00930987	0.00147963	0.0140433	0.0199657	0.00506841

## Sheet: Figure 6-figure supplement 1D
#1
Internally Normalized	Fold change in Cluc activity
Vector+LacZ	1
Vector+HNF1A	1.54222
Promoter+LacZ	1
Promoter+HNF1A	1.26589
LTR+LacZ	1
LTR+HNF1A	5.28339
#2
Internally Normalized	Fold change in Cluc activity
Vector+LacZ	1
Vector+HNF1A	1.28968
Promoter+LacZ	1
Promoter+HNF1A	1.112
LTR+LacZ	1
LTR+HNF1A	4.34265
#3
Internally Normalized	Fold change in Cluc activity
Vector+LacZ	1
Vector+HNF1A	1.27927
Promoter+LacZ	1
Promoter+HNF1A	1.07132
LTR+LacZ	1
LTR+HNF1A	4.12281

## Sheet: Figure 6-figure supplement 2A,B
Annexin V+	NY8 Ctl siRNA	NY8 OCT4 siRNA
	21.07	22.43
	19.87	22.76
	14.05	18.94
	Ctl siRNA	OCT4 siRNA
Average	18.33	21.3767
Stndev	3.75484	2.11666
SEM	2.16786	1.22205
NY8#1	Ctl	2018-10-04			NY8 Ctl G0/G1	NY8 OCT4 G0/G1	NY8 Ctl S	NY8 OCT4 S	NY8 Ctl G2/M	NY8 OCT4 G2/M
G0/G1	56.92	62.8			56.92	62.8	20.49	17.85	22.59	19.35
S	20.49	17.85			55.8	59.97	19.43	18.8	24.77	21.23
G2/M	22.59	19.35			53.81	57.2	22.52	20.8	23.67	22
NY8#2	Ctl	2018-10-04			Ctl G0/G1	OCT4 G0/G1	Ctl S	OCT4 S	Ctl G2/M	OCT4 G2/M
G0/G1	55.8	59.97			55.51	59.99	20.8133	19.15	23.6767	20.86
S	19.43	18.8			1.57515	2.80005	1.57017	1.50582	1.09002	1.36319
G2/M	24.77	21.23			0.909414	1.61661	0.906538	0.869387	0.629321	0.787041
NY8#3	Ctl	2018-10-04
G0/G1	53.81	57.2
S	22.52	20.8
G2/M	23.67	22

## Sheet: Figure 6-figure supplement 2D
NY8 EV/Ctlsi	NY8 EV/HNF1Asi	NY8 OCT4/Ctlsi	NY8 OCT4/HNF1Asi	NY15 EV/Ctlsi	NY15 EV/HNF1Asi	NY15 OCT4/Ctlsi	NY15 OCT4/HNF1Asi
1	0.612264	20.706	15.6413	1	0.796178	9.61768	7.38832
1.13075	0.533919	20.0272	14.1905	0.967583	0.649632	11.7262	7.53093
1.06527	0.562014	19.426	15.4017	0.994743	0.753677	9.73211	7.58403
