# Supplementary material for: HNF1A is a novel oncogene that regulates human pancreatic cancer stem cell properties
Source: eLife. 2018 Aug 3;7:e33947. doi: 10.7554/eLife.33947 (PMC6122955; doi:10.7554/eLife.33947)
Supplement: Supplementary file 2. — Contents of each worksheet are as follows: worksheet 1) notes for summary tables; worksheet 2) Primers for qPCR validation of CSC50 genes; worksheet 3) table includes values represented in the Figure 1E where values are fold changes relative to HL or LH, as indicated; worksheet 4) NY8 and NY15 Bru-seq data related to Figure 7A; worksheet 5) NY8 and NY15 ChIP-seq data related to Figure 7B with information regarding enhancer binding; worksheet 6) summary of selected genes in expression vs survival in TCGA PAAD tumors - related to Figure 7E, S9A, and S9B, worksheet 7) HNF1A-upregulated and -bound genes: association between gene expression and survival in TCGA PAAD tumors - related to Figure 7E; worksheet 8) HNF1A-upregulated genes: association between gene expression and survival in TCGA PAAD tumors - related to Figure 7—figure supplement 1A; worksheet 9) HNF1A-downregulated genes: association between gene expression and survival in TCGA PAAD tumors - related to Figure 7—figure supplement 1B; worksheet 10) TCGA donors used in survival analysis - related to Figure 7E, Figure 7—figure supplement 1A and B; worksheet 11) Overrepresented TF-binding motifs in cancer stem cell gene set (CSC50), oPOSSUM3 results - related to Figure 1; worksheet 12) predicted HNF1A targets - related to Figure 1; worksheet 13) overrepresented TF-binding motifs in HNF1A upregulated genes, oPOSSUM3 results - related to Figure 7D; worksheet 14) overrepresented TF-binding motifs in HNF1A downregulated genes, oPOSSUM3 results - related to Figure 7D; worksheet 15) predicted POU5F1 targets - related to Figure 7D; worksheet 16) HNF1A ChIP-seq peak enhancer overlap, NY15 replicate 1 (rep1) - related to Figure 7B; worksheet 17) A ChIP-seq peak enhancer overlap, NY15 replicate 2 (rep2) - related to Figure 7B; worksheet 18) HNF1A ChIP-seq peak enhancer overlap, NY8 replicate 1 (rep1) - related to Figure 7B; worksheet 19) HNF1A ChIP-seq peak enhancer overlap, NY8 replicate 2 (rep2) - related to Figure 7B. [file elife-33947-supp2.xlsx]

## Sheet: notes
Notes for Supplementary Tables
"CSC50_qPCR" - related to Figure 1E
table includes values represented in the figure
values are fold changes relative to P1 or P3, as indicated
Tables related to Bru- and ChIP-seq
"NY8_v_NY15_DE_Bru-seq" - related to Figure 7A
Table includes only genes that changed in given conditions (cell line and shRNA) and used to create the Venn diagrams
"is_CSC50_gene" refers to the 50 genes identified in the cancer stem cell microarray study
"NY8_and_NY15_HNF1A_binding" - related to Figure 7B
Table contains only genes commonly regulated by HNF1A in both NY8 and NY15 cells and their corresponding HNF1A binding status
Table also identifies which genes claim a nearby peak overlapping an enhancer region
Tables related to survival analyses
univariate Cox PH survival model: gene expression log10(values +1) was used as variable
these tables are ordered as the data appear in the relevant figure
"HNF1A_upregulated_bound_survival" - related to Figure 7E
Table includes all genes upregulated by and bound by HNF1A (proximally or distally) in both NY8 and NY15
"HNF1A_upregulated_survival" - related to Figure 7-figure supplement 1A
Table includes all genes upregulated by HNF1A in both NY8 and NY15
"HNF1A_suppressed_survival" - related to Figure 7-figure supplement 1B
Table includes all genes downregulated by HNF1A in both NY8 and NY15
Tables related to TF binding site analysis
oPOSSUM3 (http://opossum.cisreg.ca/oPOSSUM3) was used to identify overrepresented TF binding sites in the promoter regions of given genes
"CSC50 oPOSSUM3" - related to Figure 1
"predicted HNF1A targets" - related to Figure 1
"HNF1A upreg genes oPOSSUM3" - related to Figure 7D
"HNF1A downreg genes oPOSSUM3" - related to to Figure 7D
"predicted POU5F1 targets" - related to Figure 7D
Tables related to enhancer analysis
Enhancer annotation was obtained from ENCODE
Specifically, the Combined Segmentation files located at the below URLs:
http://hgdownload.soe.ucsc.edu/goldenPath/hg19/encodeDCC/wgEncodeAwgSegmentation/wgEncodeAwgSegmentationCombinedGm12878.bed.gz
http://hgdownload.soe.ucsc.edu/goldenPath/hg19/encodeDCC/wgEncodeAwgSegmentation/wgEncodeAwgSegmentationCombinedH1hesc.bed.gz
http://hgdownload.soe.ucsc.edu/goldenPath/hg19/encodeDCC/wgEncodeAwgSegmentation/wgEncodeAwgSegmentationCombinedHelas3.bed.gz
http://hgdownload.soe.ucsc.edu/goldenPath/hg19/encodeDCC/wgEncodeAwgSegmentation/wgEncodeAwgSegmentationCombinedHepg2.bed.gz
http://hgdownload.soe.ucsc.edu/goldenPath/hg19/encodeDCC/wgEncodeAwgSegmentation/wgEncodeAwgSegmentationCombinedHuvec.bed.gz
http://hgdownload.soe.ucsc.edu/goldenPath/hg19/encodeDCC/wgEncodeAwgSegmentation/wgEncodeAwgSegmentationCombinedK562.bed.gz
"merged enhancers" - related to Figure 7B
Regions labeled "E" for strong enhancer were merged from the 6 cell line data above into 1 enhancer region annotation
peaks with overlapping enhancer regions
peaks may be represented by multiple rows if overlapping multiple enhancer regions
peaks without enhancer overlaps are omitted (see GEO GSE108151 for complete peak lists)
"NY15 rep1 peaks enh" - related to Figure 7B
"NY15 rep2 peaks enh" - related to Figure 7B
"NY8 rep1 peaks enh" - related to Figure 7B
"NY8 rep2 peaks enh" - related to Figure 7B

## Sheet: Primers
Primer sequences for qRT-PCR validation
ACTB forward	TACCTCATGAAGATCCTCACC
ACTB reverse	TTTCGTGGATGCCACAGGAC
A1CF forward	CGTGGCTATTTGGCATACAC
A1CF reverse	ACAGGATTCATTGGGGTGAG
AGR2 forward	ATGAGTGCCCACACAGTCAA
AGR2 reverse	GGACATACTGGCCATCAGGA
AGTR1 forward	GCTTTCCTACCGCCCCTCAGA
AGTR1 reverse	TTTCGAACATGTCACTCAACCTCAA
ALDHA1 forward	GCCATAACAATCTCCTCTGCTC
ALDHA1 reverse	TCCCAGTTCTCTTCCATTTCC
ANXA10 forward	CCAGCTCCCAATTTCAATCC
ANXA10 reverse	TCTGGTATGCCTCTGCAATC
C14orf105 forward	CCTCAAAACACAGGGGCTAAC
C14orf105 reverse	AGGGAACAGCAGAAGAACCAC
CABLES1 forward	CACCAAGGGGATAAAGAAGG
CABLES1 reverse	ACGGCAGGAAGTTACAGAGC
CCR6 forward	ATGCGTCGTCCTTCACTATG
CCR6 reverse	AGAGGCTTGCTTGATTTTGC
CD24 forward	TGAAGAACATGTGAGAGGTTTGAC
CD24 reverse	GAAAACTGAATCTCCATTCCACAA
CDH17 forward	TCTTTAGTGTGGCTCCATTGG
CDH17 reverse	GGAAGACCCCCCTACTTCTGT
CHRM3 forward	CCGCTCACGTACCGAGCCAA
CHRM3 reverse	AGCACTCTCCCGGAGGCACA
CIT forward	ACCGTGTTTTCAACTGTGTCC
CIT reverse	TGGAGGTTTGTAGGCGTTTC
COL17A1 forward	TCTTCTCTGCCTACAGCAACG
COL17A1 reverse	AGTGCCCATCTCTCCTTTTTG
DNAJC22 forward	TTGTCCTCCTTCTGCCTTACC
DNAJC22 reverse	CTTCGCCCACTCCTGAAAG
DPP4 forward	AGTGGCGTGTTCAAGTGTGG
DPP4 reverse	CAAGGTTGTCTTCTGGAGTTGG
FERMT1 forward	ACCATCCCAATGAAGAGCAG
FERMT1 reverse	GTTCCCACCAAAGAGCAAAG
FGD4 forward	GAGTCTGCTGTGAACCTAAATGC
FGD4 reverse	TGCTGGGAGAGGAGTTTTTG
GCHFR forward	GCTCCTCTCTTCCCAAATCATC
GCHFR reverse	GCTTGACGCAGGGTTTCAG
GNAI1 forward	TTAGGGCTATGGGGAGGTTG
GNAI1 reverse	ACAAAGAGTTGGCGTGCATC
GPRC5D forward	TGGTCTATGTCCTCTTCCTGATG
GPRC5D reverse	CTGCTTCCAGTTCTCACACG
GTSE1 forward	AGCCCAAGAAAGAGATTCCAG
GTSE1 reverse	GGTTTGTCAGGGAGAACATCC
HAS3 forward	GTTCATCCACACGGAAAAGC
HAS3 reverse	AGGAAGGCAAAAAGGCTCTG
HIST1H1D forward	TCTGGCTCCTTCAAACTCAAC
HIST1H1D reverse	GATGCTTTTCTTCGGGGTAG
HNF1A forward	GCCTTGTTCTGTCACCAATG
HNF1A reverse	GAAATGCCTGTGTGAGTAGGTG
HNF4A forward	TGTCCCGACAGATCACCTC
HNF4A reverse	CACTCAACGAGAACCAGCAG
HSPG2 forward	TGCTGGGGTCTACATTTGC
HSPG2 reverse	ACTGTGATGGGCTTGCTTG
HTR1B forward	GGGTTCCTCAAGCCAACTTATC
HTR1B reverse	TACTTTCCAGGGTAGGGAGATG
HTR1D forward	GCTCCCCTCTCTTTTTCAACC
HTR1D reverse	GATGCCCAGGATTTTAGTGG
IGFBP1 forward	CGCCTGCGTGCAGGAGTCTG
IGFBP1 reverse	AGAGCCTTCGAGCCATCATA
JPH1 forward	GAGGATTGTGTTGCTGTGGAC
JPH1 reverse	GGCATAAGACTGGTGAGTGATG
LGR5 forward	GCATTTGTAGGCAACCCTTC
LGR5 reverse	TTGTGAGGCACCATTCAGAG
LIMK2 forward	GTGATGAGGAGACCCAGAAAAC
LIMK2 reverse	GCACACCAATGAACTTGAGC
NID1 forward	TGCGTGGACAAGATGGTTTAC
NID1 reverse	AATGATGGTGGTTGGCTCTC
NMUR2 forward	CTATGAAGACGCCCACCAAC
NMUR2 reverse	GCCCGAACAAGAAAGGGTAG
NR0B2 forward	TCAAGTCCATTCCGACCAG
NR0B2 reverse	ACCTGAGCAAAAGCATGTCC
NR5A2 forward	CAAAAAGAGATTGGGGGAGTG
NR5A2 reverse	GCGTTACTTGGAGCAGTTCAG
RCSD1 forward	TTCACAGCCCACCTTCTACC
RCSD1 reverse	CTTTTTATTGAGCCCCTCGTC
RGS17 forward	CCCACACACACTACAAAAATGG
RGS17 reverse	CGGAGGAACTCTCTGAAAAGG
SAMD5 forward	AGTGCTTTATCCCACCTTGC
SAMD5 reverse	CCCCCACCTCAATCTACTTTC
SLC15A1 forward	GCTTTCCACAATCATCACACC
SLC15A1 reverse	CCAAGGACAAACACAATCAGG
SLC38A1 forward	CAGGGTTGTGGTAAGATTCCTC
SLC38A1 reverse	GATGATGCTGATGCTACTGGTC
SLC4A11 forward	GGACCCTGACAACAATGAGC
SLC4A11 reverse	ACCCCTTGGATGGTATCTGAC
SLCO1C1 forward	TGGACACTAGCTCTTCCATGTG
SLCO1C1 reverse	GCAAAATCATCCAGGTAGGC
SLFN13 forward	CCTCCAGGGAAACGCGGAGTG
SLFN13 reverse	CCCACCGCCTGCTGTCTTCTTC
TBC1D9 forward	CGAGCAGTTCAAGGGAATG
TBC1D9 reverse	AGCACTTAGCCCAGAGACAAAC
TESC forward	GTCGGGAAACCCTCACATC
TESC reverse	GTGATCCCCTCGTACACCTG
TMPO forward	TGAATCCTGGTCCTATTGTGG
TMPO reverse	TGTTCCTTGTTCCCTCAGTTTC
TTLL6 forward	GGGCTTTGACATTTTGTTGG
TTLL6 reverse	CAGCAGACCATCTTTCACCTC
WNK4 forward	AAAACCTTCAACCCCTCAGC
WNK4 reverse	CATCATCTCCTTCCTCCTCAAC
ZNF438 forward	TGGAAGCACCAGCATAACTG
ZNF438 reverse	TTGGGGTCTCATTTCTCAGC

## Sheet: CSC50_qPCR
CSC50 genes, relative expression - related to Figure 1A
gene	NY8 P1	NY8 P2	NY8 P3	NY15 P1	NY15 P2	NY15 P3
A1CF	1	4.27065	0.0415135	0.0470627	2.12164	1
AGR2	1	4.36049	0.239646	0.157616	1.62486	1
AGTR1	1	6.0036	0.0509209	0.0905391	4.5509	1
ALDH1A1	1	3.86412	0.574411	0.316287	1.77931	1
ANXA10	1	5.28234	0.00863868	0.286272	2.38915	1
C14orf105	1	5.55677	0.136449	0.142647	2.0979	1
CABLES1	1	3.27	0.8838	0.737708	1.80001	1
CCR6	1	6.01665	0.0845492	0.0547984	1.8792	1
CD24	0.773223	4.56038	1	0.0769244	1.99403	1
CDH17	1	5.466	0.00281316	0.0518947	2.09261	1
CHRM3	1	2.08576	0.00251499	1	2.21681	0.880547
CIT	1	2.04305	0.708757	1	1.59617	0.817076
COL17A1	1	4.26573	0.11862	0.154949	2.3621	1
DNAJC22	1	3.26729	0.583726	0.59708	1.52703	1
DPP4	1	3.50642	0.00161608	0.245425	3.04053	1
FERMT1	1	3.55657	0.351842	0.348694	2.02845	1
FGD4	1	4.45932	0.987073	0.13871	1.61452	1
GCHFR	1	2.58452	0.949679	0.233454	1.50584	1
GNAI1	1	2.49109	0.00238938	0.398332	3.11613	1
GPRC5D	1	1.86794	0.732166	0.393046	1.47427	1
GTSE1	0.614987	1.45635	1	0.932899	1.95055	1
HAS3	1	2.82585	0.611798	0.353987	1.85569	1
HIST1H1D	1	2.67	0.0032	1	1.85	0.3426
HNF1A	1	2.91167	0.323448	0.301615	1.58113	1
HNF4A	1	4.92256	0.321555	0.0500909	1.59146	1
HSPG2	1	2.79593	0.15283	0.456899	2.37793	1
HTR1B	1	3.41888	0.211885	0.46124	2.06269	1
HTR1D	0.626509	1.87255	1	0.320379	2.66322	1
IGFBP1	1	1.82828	0.00183198	0.363886	2.89915	1
JPH1	1	4.4813	0.0476973	0.177989	1.98657	1
LGR5	1	1.91401	0.115071	0.417035	1.60583	1
LIMK2	1	1.94643	0.584392	0.72525	2.23527	1
NID1	1	2.34286	0.0302714	1	3.54411	0.826932
NMUR2	1	6.81715	0.460553	0.0353866	1.85577	1
NR0B2	1	6.0375	0.00516993	0.209601	3.18264	1
NR5A2	1	1.94494	0.0167988	0.628688	2.36278	1
RCSD1	1	1.69425	0.00335306	1	7.84621	0.850692
RGS17	1	2.19454	0.0949283	0.270664	2.12094	1
SAMD5	1	2.06	0.0274	0.818197	1.80003	1
SLC15A1	1	4.14385	0.00621713	0.135517	3.73428	1
SLC38A1	1	1.51157	0.00211126	1	1.8758	0.746098
SLC4A11	1	2.62952	0.64372	0.270801	1.84232	1
SLCO1C1	1	1.95405	0.363932	1	2.67778	0.734113
SLFN13	1	3.77225	0.005031	0.492124	2.54062	1
TBC1D9	1	1.81	0.2034	0.625	1.8	1
TESC	1	5.06157	0.144556	0.0367856	1.45903	1
TMPO	1	1.78	0.7857	1	1.83	0.8318
TTLL6	1	4.44521	0.24533	0.117741	1.57266	1
WNK4	1	4.1021	0.283453	0.274001	2.64092	1
ZNF438	1	2.11976	0.0627701	0.747742	2.07951	1

## Sheet: NY8_v_NY15_DE_Bru-seq
HNF1A-regulated genes (Bru-seq after shRNA in NY8 or NY15 cells) - related to Figure 7A
gene	entrez	cellLine	shRNA	foldChange	log2FoldChange	direction	is_CSC50_gene
AADAC	13	NY8	HNF1Ash2	0.602211	-0.731659	down
ABCB6	10058	NY15	HNF1Ash1	1.64897	0.721564	up
ABCB6	10058	NY15	HNF1Ash2	1.71056	0.774467	up
ABCB6	10058	NY8	HNF1Ash1	1.63472	0.709046	up
ABCB6	10058	NY8	HNF1Ash2	1.77594	0.82858	up
ABCC2	1244	NY15	HNF1Ash2	1.50376	0.588579	up
ABCC4	10257	NY8	HNF1Ash2	1.56444	0.64565	up
ABLIM1	3983	NY15	HNF1Ash2	0.653095	-0.614635	down
ACER2	340485	NY8	HNF1Ash1	0.622784	-0.683197	down
ACER2	340485	NY8	HNF1Ash2	0.568315	-0.815238	down
ACER3	55331	NY15	HNF1Ash2	0.633956	-0.657545	down
ADM	133	NY15	HNF1Ash1	1.68718	0.754615	up
ADM	133	NY15	HNF1Ash2	1.8553	0.891655	up
ADRB1	153	NY15	HNF1Ash1	0.348108	-1.52239	down
ADRB1	153	NY15	HNF1Ash2	0.27308	-1.87261	down
ADRB1	153	NY8	HNF1Ash2	0.472645	-1.08117	down
AGFG2	3268	NY15	HNF1Ash1	0.35341	-1.50058	down
AGFG2	3268	NY15	HNF1Ash2	0.359832	-1.47461	down
AGR2	10551	NY15	HNF1Ash1	0.354425	-1.49645	down	yes
AGR2	10551	NY15	HNF1Ash2	0.32291	-1.6308	down	yes
AGR2	10551	NY8	HNF1Ash2	0.537985	-0.894362	down	yes
AHR	196	NY15	HNF1Ash1	0.59549	-0.747852	down
AHR	196	NY15	HNF1Ash2	0.594317	-0.750695	down
AHR	196	NY8	HNF1Ash2	0.648711	-0.624352	down
AKAP1	8165	NY15	HNF1Ash2	0.611712	-0.709076	down
AKAP2	11217	NY15	HNF1Ash1	0.548016	-0.86771	down
AKAP2	11217	NY15	HNF1Ash2	0.529664	-0.916851	down
AKR1B1	231	NY15	HNF1Ash1	1.85347	0.890229	up
AKR1B1	231	NY15	HNF1Ash2	2.04357	1.03109	up
AKR1B1	231	NY8	HNF1Ash2	1.75518	0.81162	up
AKR1C1	1645	NY15	HNF1Ash1	1.84401	0.882849	up
AKR1C1	1645	NY15	HNF1Ash2	1.96428	0.973998	up
AKR1C1	1645	NY8	HNF1Ash2	2.14797	1.10297	up
AKR1C2	1646	NY15	HNF1Ash1	1.94278	0.95812	up
AKR1C2	1646	NY15	HNF1Ash2	2.09144	1.0645	up
AKR1C2	1646	NY8	HNF1Ash2	1.78244	0.833853	up
AKT1S1	84335	NY15	HNF1Ash1	1.97192	0.979599	up
AKT1S1	84335	NY15	HNF1Ash2	1.91709	0.938916	up
ALCAM	214	NY8	HNF1Ash1	0.488098	-1.03476	down
ALCAM	214	NY8	HNF1Ash2	0.460222	-1.1196	down
ALDH1A3	220	NY15	HNF1Ash1	0.545916	-0.87325	down
ALDH1A3	220	NY15	HNF1Ash2	0.539613	-0.890002	down
ALDH1A3	220	NY8	HNF1Ash1	0.606213	-0.722103	down
ALDH1A3	220	NY8	HNF1Ash2	0.525027	-0.929537	down
ALDH1L1	10840	NY8	HNF1Ash1	0.651555	-0.61804	down
ALDH2	217	NY8	HNF1Ash2	0.656142	-0.607921	down
ALOX5	240	NY15	HNF1Ash1	0.453608	-1.14048	down
ALOX5	240	NY15	HNF1Ash2	0.429828	-1.21817	down
ALOX5	240	NY8	HNF1Ash1	0.433615	-1.20551	down
ALOX5	240	NY8	HNF1Ash2	0.303944	-1.71812	down
ANK3	288	NY15	HNF1Ash1	2.14877	1.10351	up
ANK3	288	NY15	HNF1Ash2	2.17451	1.12069	up
ANKDD1A	348094	NY8	HNF1Ash2	1.57051	0.651232	up
ANKRD22	118932	NY15	HNF1Ash1	0.595752	-0.747216	down
ANKRD22	118932	NY15	HNF1Ash2	0.464519	-1.10619	down
ANKRD22	118932	NY8	HNF1Ash2	0.624179	-0.679968	down
ANKRD36	375248	NY8	HNF1Ash1	0.62575	-0.676343	down
ANKRD36	375248	NY8	HNF1Ash2	0.640115	-0.643596	down
ANKRD36B	57730	NY15	HNF1Ash1	0.516165	-0.954097	down
ANKRD36B	57730	NY15	HNF1Ash2	0.468481	-1.09394	down
ANKRD36B	57730	NY8	HNF1Ash1	0.626458	-0.67471	down
ANKRD36B	57730	NY8	HNF1Ash2	0.576559	-0.794459	down
ANKRD36BP2	645784	NY8	HNF1Ash1	0.544791	-0.876224	down
ANKRD36BP2	645784	NY8	HNF1Ash2	0.470484	-1.08778	down
ANKRD37	353322	NY8	HNF1Ash1	1.51075	0.595265	up
ANKRD57	65124	NY8	HNF1Ash1	0.578226	-0.790294	down
ANKRD57	65124	NY8	HNF1Ash2	0.585755	-0.771631	down
ANPEP	290	NY15	HNF1Ash1	1.93132	0.949587	up
ANPEP	290	NY15	HNF1Ash2	1.95474	0.966979	up
ANPEP	290	NY8	HNF1Ash1	1.52512	0.608923	up
ANTXR2	118429	NY15	HNF1Ash2	0.627929	-0.671326	down
ANXA10	11199	NY15	HNF1Ash1	0.336333	-1.57204	down	yes
ANXA10	11199	NY15	HNF1Ash2	0.352639	-1.50374	down	yes
ANXA10	11199	NY8	HNF1Ash1	0.407376	-1.29557	down	yes
ANXA10	11199	NY8	HNF1Ash2	0.375851	-1.41177	down	yes
ANXA3	306	NY15	HNF1Ash1	0.458966	-1.12354	down
ANXA3	306	NY15	HNF1Ash2	0.402311	-1.31362	down
ANXA3	306	NY8	HNF1Ash1	0.640384	-0.642992	down
ANXA3	306	NY8	HNF1Ash2	0.463301	-1.10998	down
ANXA4	307	NY15	HNF1Ash1	0.445807	-1.16551	down
ANXA4	307	NY15	HNF1Ash2	0.386692	-1.37074	down
ANXA4	307	NY8	HNF1Ash1	0.461231	-1.11644	down
ANXA4	307	NY8	HNF1Ash2	0.370326	-1.43313	down
ANXA6	309	NY15	HNF1Ash1	1.64297	0.71631	up
ANXA6	309	NY15	HNF1Ash2	1.5576	0.639329	up
AP1AR	55435	NY15	HNF1Ash1	0.660757	-0.597809	down
AP1AR	55435	NY8	HNF1Ash1	0.632713	-0.660376	down
AP1AR	55435	NY8	HNF1Ash2	0.635844	-0.653255	down
APRT	353	NY8	HNF1Ash2	1.63667	0.710765	up
ARHGAP10	79658	NY15	HNF1Ash2	0.66379	-0.591201	down
ARHGAP24	83478	NY15	HNF1Ash1	0.62655	-0.674499	down
ARHGAP24	83478	NY15	HNF1Ash2	0.583288	-0.777721	down
ARHGAP24	83478	NY8	HNF1Ash2	0.637367	-0.649804	down
ARHGAP27	201176	NY15	HNF1Ash1	0.481074	-1.05567	down
ARHGAP27	201176	NY15	HNF1Ash2	0.444301	-1.17039	down
ARHGAP27	201176	NY8	HNF1Ash2	0.620836	-0.687716	down
ARHGAP42	143872	NY15	HNF1Ash1	0.531699	-0.911319	down
ARHGAP42	143872	NY15	HNF1Ash2	0.488838	-1.03257	down
ARHGAP42	143872	NY8	HNF1Ash1	0.599792	-0.737465	down
ARHGAP42	143872	NY8	HNF1Ash2	0.546741	-0.871071	down
ARHGEF10L	55160	NY15	HNF1Ash2	0.602026	-0.732103	down
ARHGEF10L	55160	NY8	HNF1Ash2	0.589994	-0.761229	down
ARL14	80117	NY15	HNF1Ash1	0.529874	-0.916278	down
ARL14	80117	NY15	HNF1Ash2	0.457769	-1.12731	down
ARL14	80117	NY8	HNF1Ash1	0.559147	-0.838701	down
ARL14	80117	NY8	HNF1Ash2	0.513047	-0.962836	down
ARNTL2	56938	NY15	HNF1Ash2	0.646902	-0.62838	down
ARRDC2	27106	NY8	HNF1Ash2	0.665934	-0.58655	down
ASAP3	55616	NY15	HNF1Ash1	1.58838	0.66756	up
ASAP3	55616	NY15	HNF1Ash2	1.52247	0.606415	up
ASNS	440	NY8	HNF1Ash1	0.613545	-0.704759	down
ASNS	440	NY8	HNF1Ash2	0.596274	-0.745953	down
ASPHD1	253982	NY8	HNF1Ash1	1.99729	0.998042	up
ASS1	445	NY15	HNF1Ash1	1.50487	0.589636	up
ATP5L2	267020	NY8	HNF1Ash2	1.52972	0.613269	up
AVPI1	60370	NY8	HNF1Ash2	0.629922	-0.666756	down
B3GALNT1	8706	NY15	HNF1Ash2	1.71996	0.782377	up
B3GALT5	10317	NY15	HNF1Ash1	0.357013	-1.48595	down
B3GALT5	10317	NY15	HNF1Ash2	0.437724	-1.19191	down
B3GALT5	10317	NY8	HNF1Ash2	0.572119	-0.805612	down
B3GNT3	10331	NY15	HNF1Ash1	0.303835	-1.71864	down
B3GNT3	10331	NY15	HNF1Ash2	0.251639	-1.99057	down
B3GNT3	10331	NY8	HNF1Ash1	0.444883	-1.1685	down
B3GNT3	10331	NY8	HNF1Ash2	0.271277	-1.88216	down
B3GNT5	84002	NY15	HNF1Ash1	0.605789	-0.723113	down
B3GNT5	84002	NY15	HNF1Ash2	0.553994	-0.852059	down
B3GNT5	84002	NY8	HNF1Ash2	0.607756	-0.718436	down
B4GALT2	8704	NY15	HNF1Ash1	1.51182	0.59629	up
B4GALT2	8704	NY15	HNF1Ash2	1.65182	0.724057	up
BACH1	571	NY15	HNF1Ash1	0.58328	-0.77774	down
BACH1	571	NY15	HNF1Ash2	0.514336	-0.959218	down
BACH1	571	NY8	HNF1Ash1	0.651165	-0.618905	down
BACH1	571	NY8	HNF1Ash2	0.650299	-0.620826	down
BAG1	573	NY8	HNF1Ash2	0.627173	-0.673065	down
BAIAP2L1	55971	NY15	HNF1Ash1	0.471633	-1.08426	down
BAIAP2L1	55971	NY15	HNF1Ash2	0.432504	-1.20921	down
BAIAP2L1	55971	NY8	HNF1Ash1	0.638401	-0.647464	down
BAIAP2L1	55971	NY8	HNF1Ash2	0.523576	-0.933529	down
BAMBI	25805	NY15	HNF1Ash1	1.70648	0.771021	up
BAMBI	25805	NY15	HNF1Ash2	1.68186	0.750057	up
BCAS1	8537	NY15	HNF1Ash1	0.373353	-1.42139	down
BCAS1	8537	NY15	HNF1Ash2	0.315787	-1.66298	down
BCAS1	8537	NY8	HNF1Ash1	0.543423	-0.879851	down
BCAS1	8537	NY8	HNF1Ash2	0.413046	-1.27563	down
BCL10	8915	NY15	HNF1Ash1	0.543707	-0.879099	down
BCL10	8915	NY15	HNF1Ash2	0.4491	-1.15489	down
BCL10	8915	NY8	HNF1Ash1	0.613906	-0.703911	down
BCL10	8915	NY8	HNF1Ash2	0.539521	-0.890249	down
BCL2L1	598	NY15	HNF1Ash2	0.64964	-0.622287	down
BCL2L11	10018	NY8	HNF1Ash2	1.80236	0.84989	up
BCL2L14	79370	NY15	HNF1Ash1	0.368618	-1.4398	down
BCL2L14	79370	NY15	HNF1Ash2	0.261537	-1.93491	down
BCL2L14	79370	NY8	HNF1Ash1	0.439868	-1.18486	down
BCL2L14	79370	NY8	HNF1Ash2	0.260125	-1.94272	down
BCL2L15	440603	NY15	HNF1Ash1	0.527008	-0.924104	down
BCL2L15	440603	NY15	HNF1Ash2	0.542607	-0.88202	down
BCL2L15	440603	NY8	HNF1Ash1	0.577727	-0.791541	down
BCL2L15	440603	NY8	HNF1Ash2	0.584156	-0.775575	down
BICC1	80114	NY8	HNF1Ash1	0.651018	-0.619231	down
BIRC3	330	NY15	HNF1Ash1	0.621299	-0.68664	down
BIRC3	330	NY15	HNF1Ash2	0.469087	-1.09207	down
BMP4	652	NY8	HNF1Ash1	1.82988	0.871747	up
BOLA1	51027	NY8	HNF1Ash1	0.59487	-0.749354	down
BREA2	NA	NY8	HNF1Ash1	0.656773	-0.606533	neither
BREA2	NA	NY8	HNF1Ash2	1.50113	0.586045	neither
C10orf116	10974	NY8	HNF1Ash1	1.66117	0.732197	up
C10orf47	254427	NY15	HNF1Ash1	0.467527	-1.09688	down
C10orf47	254427	NY15	HNF1Ash2	0.41434	-1.27111	down
C10orf47	254427	NY8	HNF1Ash1	0.575368	-0.797442	down
C10orf47	254427	NY8	HNF1Ash2	0.569557	-0.812089	down
C11orf68	83638	NY8	HNF1Ash1	1.66269	0.733519	up
C11orf83	790955	NY8	HNF1Ash2	0.570396	-0.809964	down
C11orf92	399948	NY8	HNF1Ash2	0.512325	-0.964868	down
C11orf93	120376	NY8	HNF1Ash2	0.44969	-1.153	down
C12orf36	283422	NY15	HNF1Ash1	0.277002	-1.85203	down
C12orf36	283422	NY15	HNF1Ash2	0.230953	-2.11433	down
C12orf36	283422	NY8	HNF1Ash1	0.438999	-1.18771	down
C12orf36	283422	NY8	HNF1Ash2	0.249143	-2.00495	down
C12orf61	283416	NY8	HNF1Ash2	0.652776	-0.61534	down
C12orf75	387882	NY8	HNF1Ash2	0.634836	-0.655545	down
C14orf105	55195	NY15	HNF1Ash1	0.33284	-1.5871	down	yes
C14orf105	55195	NY15	HNF1Ash2	0.347549	-1.52471	down	yes
C14orf105	55195	NY8	HNF1Ash1	0.353709	-1.49936	down	yes
C14orf105	55195	NY8	HNF1Ash2	0.28324	-1.8199	down	yes
C15orf48	84419	NY15	HNF1Ash1	0.645697	-0.631072	down
C15orf48	84419	NY15	HNF1Ash2	0.344464	-1.53757	down
C15orf58	390637	NY8	HNF1Ash1	0.58944	-0.762582	down
C15orf58	390637	NY8	HNF1Ash2	0.610273	-0.712474	down
C1orf106	55765	NY15	HNF1Ash1	0.250266	-1.99847	down
C1orf106	55765	NY15	HNF1Ash2	0.221854	-2.17232	down
C1orf106	55765	NY8	HNF1Ash1	0.283407	-1.81905	down
C1orf106	55765	NY8	HNF1Ash2	0.153511	-2.70358	down
C1orf116	79098	NY15	HNF1Ash1	0.232307	-2.10589	down
C1orf116	79098	NY15	HNF1Ash2	0.188268	-2.40914	down
C1orf116	79098	NY8	HNF1Ash1	0.37473	-1.41608	down
C1orf116	79098	NY8	HNF1Ash2	0.160033	-2.64356	down
C20orf20	55257	NY15	HNF1Ash1	1.57857	0.658622	up
C20orf20	55257	NY15	HNF1Ash2	2.09502	1.06696	up
C21orf88	114041	NY15	HNF1Ash1	0.329213	-1.60291	down
C21orf88	114041	NY15	HNF1Ash2	0.314502	-1.66886	down
C21orf88	114041	NY8	HNF1Ash2	0.456097	-1.13259	down
C4BPB	725	NY15	HNF1Ash1	0.439109	-1.18735	down
C4BPB	725	NY15	HNF1Ash2	0.381635	-1.38973	down
C4BPB	725	NY8	HNF1Ash1	0.497312	-1.00778	down
C4BPB	725	NY8	HNF1Ash2	0.404586	-1.30548	down
C4orf32	132720	NY8	HNF1Ash1	0.623512	-0.681512	down
C4orf32	132720	NY8	HNF1Ash2	0.646649	-0.628946	down
C5orf30	90355	NY15	HNF1Ash1	1.58131	0.66112	up
C5orf30	90355	NY15	HNF1Ash2	1.71124	0.77504	up
C5orf30	90355	NY8	HNF1Ash2	1.51866	0.6028	up
C5orf55	116349	NY8	HNF1Ash2	1.57688	0.657069	up
C5orf62	85027	NY8	HNF1Ash1	1.54241	0.625189	up
C5orf62	85027	NY8	HNF1Ash2	1.59143	0.670325	up
C6orf132	647024	NY15	HNF1Ash1	0.458218	-1.12589	down
C6orf132	647024	NY15	HNF1Ash2	0.365039	-1.45388	down
C6orf132	647024	NY8	HNF1Ash1	0.597218	-0.743671	down
C6orf132	647024	NY8	HNF1Ash2	0.379392	-1.39824	down
C6orf192	116843	NY15	HNF1Ash2	0.648802	-0.62415	down
C8orf4	56892	NY8	HNF1Ash1	0.633562	-0.658443	down
C9orf125	84302	NY15	HNF1Ash2	0.592395	-0.755369	down
C9orf150	286343	NY8	HNF1Ash2	0.651946	-0.617176	down
C9orf16	79095	NY8	HNF1Ash2	0.666316	-0.585722	down
C9orf47	286223	NY8	HNF1Ash1	1.78285	0.834183	up
C9orf47	286223	NY8	HNF1Ash2	1.71095	0.774799	up
C9orf64	84267	NY8	HNF1Ash2	0.629276	-0.668236	down
C9orf68	55064	NY15	HNF1Ash1	0.511629	-0.966831	down
C9orf68	55064	NY15	HNF1Ash2	0.465431	-1.10336	down
C9orf68	55064	NY8	HNF1Ash1	0.55927	-0.838384	down
C9orf68	55064	NY8	HNF1Ash2	0.474711	-1.07488	down
CACNA2D1	781	NY15	HNF1Ash1	1.94143	0.957118	up
CACNA2D1	781	NY15	HNF1Ash2	1.87095	0.903771	up
CACNA2D1	781	NY8	HNF1Ash2	1.82871	0.870825	up
CACNG6	59285	NY15	HNF1Ash1	0.592448	-0.755239	down
CACNG6	59285	NY15	HNF1Ash2	0.622783	-0.683198	down
CALD1	800	NY15	HNF1Ash1	2.27013	1.18277	up
CALD1	800	NY15	HNF1Ash2	2.54907	1.34997	up
CAMK2N1	55450	NY8	HNF1Ash2	0.635305	-0.654478	down
CAPG	822	NY15	HNF1Ash1	0.63687	-0.65093	down
CAPG	822	NY15	HNF1Ash2	0.605216	-0.724478	down
CAPN1	823	NY15	HNF1Ash1	0.638305	-0.647683	down
CAPN1	823	NY15	HNF1Ash2	0.645907	-0.630602	down
CAPN8	388743	NY15	HNF1Ash1	0.238088	-2.07044	down
CAPN8	388743	NY15	HNF1Ash2	0.184374	-2.43929	down
CAPN8	388743	NY8	HNF1Ash1	0.418246	-1.25758	down
CAPN8	388743	NY8	HNF1Ash2	0.240164	-2.05791	down
CARD11	84433	NY15	HNF1Ash1	0.577688	-0.791636	down
CARD11	84433	NY15	HNF1Ash2	0.573965	-0.800964	down
CARD11	84433	NY8	HNF1Ash1	0.664138	-0.590444	down
CARD11	84433	NY8	HNF1Ash2	0.637707	-0.649035	down
CASP10	843	NY15	HNF1Ash2	0.607535	-0.718961	down
CCDC68	80323	NY15	HNF1Ash1	0.658839	-0.602003	down
CCDC68	80323	NY15	HNF1Ash2	0.585199	-0.773	down
CCL20	6364	NY15	HNF1Ash1	0.292676	-1.77263	down
CCL20	6364	NY15	HNF1Ash2	0.173534	-2.52671	down
CCL20	6364	NY8	HNF1Ash1	0.456569	-1.1311	down
CCL20	6364	NY8	HNF1Ash2	0.504897	-0.985938	down
CCNG2	901	NY15	HNF1Ash1	0.656576	-0.606967	down
CCNG2	901	NY15	HNF1Ash2	0.575831	-0.796283	down
CD24	100133941	NY15	HNF1Ash1	0.447915	-1.1587	down	yes
CD24	100133941	NY15	HNF1Ash2	0.419735	-1.25245	down	yes
CD24	100133941	NY8	HNF1Ash1	0.574402	-0.799867	down	yes
CD24	100133941	NY8	HNF1Ash2	0.422839	-1.24182	down	yes
CD2AP	23607	NY15	HNF1Ash2	0.641149	-0.641268	down
CD47	961	NY15	HNF1Ash1	0.65384	-0.61299	down
CD47	961	NY15	HNF1Ash2	0.609963	-0.713207	down
CD55	1604	NY15	HNF1Ash1	0.518554	-0.947435	down
CD55	1604	NY15	HNF1Ash2	0.523471	-0.933818	down
CD55	1604	NY8	HNF1Ash1	0.498579	-1.0041	down
CD55	1604	NY8	HNF1Ash2	0.454134	-1.13881	down
CD59	966	NY15	HNF1Ash1	0.649734	-0.62208	down
CD9	928	NY15	HNF1Ash1	0.657255	-0.605476	down
CD9	928	NY15	HNF1Ash2	0.626193	-0.675321	down
CDC42EP2	10435	NY15	HNF1Ash1	0.540475	-0.8877	down
CDC42EP2	10435	NY15	HNF1Ash2	0.435134	-1.20047	down
CDH17	1015	NY15	HNF1Ash1	0.173048	-2.53076	down	yes
CDH17	1015	NY15	HNF1Ash2	0.170532	-2.55188	down	yes
CDH17	1015	NY8	HNF1Ash1	0.131583	-2.92596	down	yes
CDH17	1015	NY8	HNF1Ash2	0.0655573	-3.9311	down	yes
CDON	50937	NY15	HNF1Ash1	1.56949	0.650295	up
CDON	50937	NY15	HNF1Ash2	1.61315	0.689883	up
CDON	50937	NY8	HNF1Ash2	1.52322	0.607128	up
CEACAM1	634	NY15	HNF1Ash2	0.574399	-0.799875	down
CEACAM1	634	NY8	HNF1Ash1	0.592339	-0.755506	down
CEACAM1	634	NY8	HNF1Ash2	0.456488	-1.13135	down
CEACAM6	4680	NY8	HNF1Ash2	0.42616	-1.23053	down
CHAC1	79094	NY8	HNF1Ash2	0.491582	-1.0245	down
CHCHD10	400916	NY8	HNF1Ash2	2.10909	1.07662	up
CHKA	1119	NY15	HNF1Ash2	0.59427	-0.75081	down
CHKA	1119	NY8	HNF1Ash1	0.666262	-0.585838	down
CHKA	1119	NY8	HNF1Ash2	0.592271	-0.755671	down
CHMP2B	25978	NY15	HNF1Ash1	0.548359	-0.866808	down
CHMP2B	25978	NY15	HNF1Ash2	0.543247	-0.880319	down
CHMP2B	25978	NY8	HNF1Ash2	0.635442	-0.654168	down
CHMP4C	92421	NY15	HNF1Ash2	0.619558	-0.690689	down
CHMP4C	92421	NY8	HNF1Ash1	0.655866	-0.608527	down
CHMP4C	92421	NY8	HNF1Ash2	0.575746	-0.796496	down
CITED2	10370	NY15	HNF1Ash1	1.76993	0.823695	up
CITED2	10370	NY15	HNF1Ash2	1.89833	0.92473	up
CITED2	10370	NY8	HNF1Ash1	1.55811	0.639798	up
CITED2	10370	NY8	HNF1Ash2	1.81873	0.862931	up
CLDN12	9069	NY15	HNF1Ash1	0.654357	-0.611849	down
CLDN12	9069	NY15	HNF1Ash2	0.624594	-0.67901	down
CLMN	79789	NY15	HNF1Ash1	0.652706	-0.615495	down
CLMN	79789	NY15	HNF1Ash2	0.627724	-0.671799	down
CLMP	79827	NY15	HNF1Ash1	0.637292	-0.649974	down
CLMP	79827	NY15	HNF1Ash2	0.584073	-0.775779	down
CLMP	79827	NY8	HNF1Ash1	0.647762	-0.626463	down
CLMP	79827	NY8	HNF1Ash2	0.592427	-0.75529	down
CMPK1	51727	NY8	HNF1Ash1	0.65146	-0.618251	down
CMPK1	51727	NY8	HNF1Ash2	0.594985	-0.749076	down
CNN3	1266	NY15	HNF1Ash1	1.8535	0.890248	up
CNN3	1266	NY15	HNF1Ash2	1.73809	0.797505	up
COL17A1	1308	NY15	HNF1Ash1	0.323556	-1.62791	down	yes
COL17A1	1308	NY15	HNF1Ash2	0.259	-1.94897	down	yes
COL17A1	1308	NY8	HNF1Ash1	0.390115	-1.35803	down	yes
COL17A1	1308	NY8	HNF1Ash2	0.231762	-2.10928	down	yes
COPZ2	51226	NY8	HNF1Ash1	2.03415	1.02443	up
CPM	1368	NY15	HNF1Ash1	0.40197	-1.31484	down
CPM	1368	NY15	HNF1Ash2	0.400778	-1.31913	down
CPM	1368	NY8	HNF1Ash1	0.426744	-1.22856	down
CPM	1368	NY8	HNF1Ash2	0.378482	-1.4017	down
CRIP2	1397	NY8	HNF1Ash2	1.58674	0.666065	up
CRYZ	1429	NY15	HNF1Ash1	0.645193	-0.632197	down
CRYZ	1429	NY15	HNF1Ash2	0.625971	-0.675833	down
CRYZ	1429	NY8	HNF1Ash2	0.658774	-0.602144	down
CSF1	1435	NY15	HNF1Ash1	1.83522	0.875956	up
CSF1	1435	NY15	HNF1Ash2	1.60129	0.679236	up
CSF1	1435	NY8	HNF1Ash2	1.51377	0.598146	up
CTH	1491	NY8	HNF1Ash1	0.61409	-0.703478	down
CTH	1491	NY8	HNF1Ash2	0.659618	-0.600297	down
CTNND1	1500	NY15	HNF1Ash2	0.620706	-0.688018	down
CTSD	1509	NY15	HNF1Ash1	1.80036	0.848282	up
CTSD	1509	NY15	HNF1Ash2	2.20133	1.13838	up
CTSD	1509	NY8	HNF1Ash1	1.79247	0.841949	up
CTSD	1509	NY8	HNF1Ash2	1.81964	0.863653	up
CTSE	1510	NY15	HNF1Ash1	0.498389	-1.00465	down
CTSE	1510	NY15	HNF1Ash2	0.393255	-1.34646	down
CTSE	1510	NY8	HNF1Ash1	0.589711	-0.76192	down
CTSE	1510	NY8	HNF1Ash2	0.530952	-0.913348	down
CTSL1	1514	NY15	HNF1Ash1	1.55018	0.632434	up
CTSL1	1514	NY15	HNF1Ash2	1.60469	0.682292	up
CTSS	1520	NY8	HNF1Ash1	0.582483	-0.779711	down
CTSS	1520	NY8	HNF1Ash2	0.586024	-0.770969	down
CTTNBP2NL	55917	NY15	HNF1Ash1	0.590844	-0.759152	down
CTTNBP2NL	55917	NY15	HNF1Ash2	0.529598	-0.91703	down
CTTNBP2NL	55917	NY8	HNF1Ash1	0.620713	-0.688001	down
CTTNBP2NL	55917	NY8	HNF1Ash2	0.574175	-0.800438	down
CUEDC1	404093	NY8	HNF1Ash1	1.57838	0.658441	up
CXADR	1525	NY15	HNF1Ash1	0.605523	-0.723745	down
CXADR	1525	NY15	HNF1Ash2	0.55146	-0.858671	down
CXADR	1525	NY8	HNF1Ash1	0.621393	-0.686423	down
CXCL16	58191	NY8	HNF1Ash2	0.536011	-0.899666	down
CXCL2	2920	NY8	HNF1Ash2	0.582403	-0.779909	down
CXCL3	2921	NY15	HNF1Ash1	0.263433	-1.92449	down
CXCL3	2921	NY15	HNF1Ash2	0.297135	-1.75081	down
CXCL3	2921	NY8	HNF1Ash1	0.486009	-1.04095	down
CXCL3	2921	NY8	HNF1Ash2	0.42057	-1.24958	down
CXCL5	6374	NY8	HNF1Ash1	0.382223	-1.38751	down
CXCL5	6374	NY8	HNF1Ash2	0.222459	-2.16839	down
CXorf69	644538	NY8	HNF1Ash2	1.82783	0.870135	up
CXXC5	51523	NY15	HNF1Ash1	1.62964	0.704557	up
CYB5D1	124637	NY8	HNF1Ash2	1.53814	0.621184	up
CYBRD1	79901	NY15	HNF1Ash2	1.56203	0.643419	up
CYP1B1	1545	NY15	HNF1Ash1	1.59263	0.671413	up
CYP1B1	1545	NY15	HNF1Ash2	2.24042	1.16377	up
CYP24A1	1591	NY15	HNF1Ash1	0.325554	-1.61903	down
CYP24A1	1591	NY15	HNF1Ash2	0.247961	-2.01182	down
CYP24A1	1591	NY8	HNF1Ash1	0.24001	-2.05884	down
CYP24A1	1591	NY8	HNF1Ash2	0.157834	-2.66352	down
CYP3A5	1577	NY15	HNF1Ash1	0.398228	-1.32833	down
CYP3A5	1577	NY15	HNF1Ash2	0.367896	-1.44263	down
CYP3A5	1577	NY8	HNF1Ash1	0.467986	-1.09546	down
CYP3A5	1577	NY8	HNF1Ash2	0.409081	-1.28954	down
CYTIP	9595	NY15	HNF1Ash1	1.5022	0.587075	up
CYTIP	9595	NY15	HNF1Ash2	1.7161	0.779135	up
CYTIP	9595	NY8	HNF1Ash2	1.83918	0.879061	up
DAPK1	1612	NY15	HNF1Ash1	0.49714	-1.00828	down
DAPK1	1612	NY15	HNF1Ash2	0.460774	-1.11787	down
DAPK1	1612	NY8	HNF1Ash2	0.644589	-0.633549	down
DDIT4	54541	NY15	HNF1Ash1	1.54149	0.624329	up
DDR1	780	NY15	HNF1Ash2	0.54164	-0.884594	down
DDR1	780	NY8	HNF1Ash2	0.633624	-0.658301	down
DENND2D	79961	NY15	HNF1Ash2	0.632967	-0.659797	down
DENND2D	79961	NY8	HNF1Ash2	0.593711	-0.752166	down
DGKA	1606	NY15	HNF1Ash1	0.554941	-0.849594	down
DGKA	1606	NY15	HNF1Ash2	0.504981	-0.985699	down
DGKA	1606	NY8	HNF1Ash2	0.639735	-0.644453	down
DHRS9	10170	NY15	HNF1Ash1	0.255887	-1.96642	down
DHRS9	10170	NY15	HNF1Ash2	0.264638	-1.91791	down
DHRS9	10170	NY8	HNF1Ash1	0.377019	-1.40729	down
DHRS9	10170	NY8	HNF1Ash2	0.25169	-1.99028	down
DIAPH1	1729	NY15	HNF1Ash1	0.658865	-0.601945	down
DIAPH1	1729	NY15	HNF1Ash2	0.634257	-0.65686	down
DIAPH2	1730	NY15	HNF1Ash1	0.646043	-0.630298	down
DIAPH2	1730	NY15	HNF1Ash2	0.583954	-0.776072	down
DIAPH2	1730	NY8	HNF1Ash2	0.666446	-0.58544	down
DIO2	1734	NY15	HNF1Ash1	2.43662	1.28488	neither
DIO2	1734	NY15	HNF1Ash2	3.14214	1.65175	neither
DIO2	1734	NY8	HNF1Ash1	0.614848	-0.701698	neither
DKK3	27122	NY15	HNF1Ash1	1.57127	0.651932	up
DKK3	27122	NY15	HNF1Ash2	1.55647	0.638279	up
DLG3	1741	NY15	HNF1Ash1	0.534484	-0.90378	down
DLG3	1741	NY15	HNF1Ash2	0.476181	-1.07042	down
DLG3	1741	NY8	HNF1Ash2	0.662388	-0.594251	down
DNAJA4	55466	NY8	HNF1Ash1	0.642314	-0.638648	down
DNAJA4	55466	NY8	HNF1Ash2	0.554157	-0.851633	down
DNAJB1	3337	NY8	HNF1Ash2	0.609615	-0.714029	down
DNAJC22	79962	NY15	HNF1Ash1	0.503288	-0.990543	down	yes
DNAJC22	79962	NY15	HNF1Ash2	0.573837	-0.801287	down	yes
DOCK5	80005	NY15	HNF1Ash2	0.646404	-0.629493	down
DPP4	1803	NY15	HNF1Ash1	0.350718	-1.51162	down	yes
DPP4	1803	NY15	HNF1Ash2	0.325445	-1.61951	down	yes
DPP4	1803	NY8	HNF1Ash1	0.383837	-1.38144	down	yes
DPP4	1803	NY8	HNF1Ash2	0.298183	-1.74573	down	yes
DPYD	1806	NY15	HNF1Ash1	1.52261	0.60655	up
DPYD	1806	NY15	HNF1Ash2	1.50637	0.591074	up
DSC2	1824	NY15	HNF1Ash1	0.488575	-1.03335	down
DSC2	1824	NY15	HNF1Ash2	0.432791	-1.20826	down
DSC2	1824	NY8	HNF1Ash2	0.647307	-0.627479	down
DSEL	92126	NY8	HNF1Ash2	1.58944	0.668519	up
DSG2	1829	NY15	HNF1Ash1	0.534778	-0.902987	down
DSG2	1829	NY15	HNF1Ash2	0.496526	-1.01006	down
DSG2	1829	NY8	HNF1Ash1	0.605932	-0.722772	down
DSG2	1829	NY8	HNF1Ash2	0.525875	-0.927208	down
DSP	1832	NY15	HNF1Ash1	0.656883	-0.606291	down
DSP	1832	NY15	HNF1Ash2	0.541654	-0.884557	down
DSP	1832	NY8	HNF1Ash1	0.663187	-0.592513	down
DSP	1832	NY8	HNF1Ash2	0.491071	-1.026	down
DUOX2	50506	NY15	HNF1Ash1	0.246875	-2.01814	down
DUOX2	50506	NY15	HNF1Ash2	0.227036	-2.13901	down
DUOX2	50506	NY8	HNF1Ash1	0.431365	-1.21302	down
DUOX2	50506	NY8	HNF1Ash2	0.234524	-2.09219	down
DUSP23	54935	NY8	HNF1Ash1	0.558029	-0.841588	down
DUSP5	1847	NY15	HNF1Ash1	0.489209	-1.03148	down
DUSP5	1847	NY15	HNF1Ash2	0.427262	-1.22681	down
DUSP5	1847	NY8	HNF1Ash1	0.605119	-0.724708	down
DUSP5	1847	NY8	HNF1Ash2	0.522948	-0.935262	down
EDARADD	128178	NY15	HNF1Ash1	1.85164	0.888802	up
EDARADD	128178	NY15	HNF1Ash2	1.87849	0.90957	up
EDN1	1906	NY15	HNF1Ash1	0.633823	-0.657849	down
EDN1	1906	NY15	HNF1Ash2	0.598123	-0.741487	down
EDN1	1906	NY8	HNF1Ash1	0.524131	-0.932001	down
EDN1	1906	NY8	HNF1Ash2	0.473288	-1.07921	down
EEPD1	80820	NY15	HNF1Ash1	0.555237	-0.848824	down
EEPD1	80820	NY15	HNF1Ash2	0.500127	-0.999633	down
EEPD1	80820	NY8	HNF1Ash2	0.616373	-0.698125	down
EFEMP1	2202	NY8	HNF1Ash1	1.50199	0.586872	up
EFEMP1	2202	NY8	HNF1Ash2	1.53141	0.614856	up
EFNA1	1942	NY8	HNF1Ash2	0.662146	-0.594778	down
EFNB1	1947	NY15	HNF1Ash1	0.517626	-0.950017	down
EFNB1	1947	NY15	HNF1Ash2	0.574004	-0.800867	down
EHF	26298	NY15	HNF1Ash1	0.599685	-0.737723	down
EHF	26298	NY15	HNF1Ash2	0.530664	-0.914129	down
EHF	26298	NY8	HNF1Ash2	0.595661	-0.747437	down
ELF3	1999	NY15	HNF1Ash1	0.537512	-0.895632	down
ELF3	1999	NY15	HNF1Ash2	0.455115	-1.1357	down
ELF3	1999	NY8	HNF1Ash1	0.638922	-0.646289	down
ELF3	1999	NY8	HNF1Ash2	0.515771	-0.955198	down
ENG	2022	NY15	HNF1Ash1	1.57456	0.654949	up
ENO2	2026	NY8	HNF1Ash1	1.70806	0.77236	up
ENO2	2026	NY8	HNF1Ash2	1.55868	0.64032	up
EPB41L1	2036	NY15	HNF1Ash1	0.475401	-1.07278	down
EPB41L1	2036	NY15	HNF1Ash2	0.450885	-1.14917	down
EPB41L1	2036	NY8	HNF1Ash1	0.625221	-0.677561	down
EPB41L1	2036	NY8	HNF1Ash2	0.523996	-0.932372	down
EPB41L2	2037	NY15	HNF1Ash1	0.552066	-0.857087	down
EPB41L2	2037	NY15	HNF1Ash2	0.496794	-1.00928	down
EPB41L4B	54566	NY15	HNF1Ash2	0.584082	-0.775757	down
EPCAM	4072	NY15	HNF1Ash1	0.324687	-1.62288	down
EPCAM	4072	NY15	HNF1Ash2	0.253688	-1.97887	down
EPCAM	4072	NY8	HNF1Ash1	0.559795	-0.83703	down
EPCAM	4072	NY8	HNF1Ash2	0.299269	-1.74048	down
EPHA2	1969	NY15	HNF1Ash1	0.660459	-0.598459	down
EPHA2	1969	NY15	HNF1Ash2	0.606304	-0.721886	down
EPHX1	2052	NY15	HNF1Ash1	1.75299	0.80982	up
EPHX1	2052	NY15	HNF1Ash2	1.76455	0.819302	up
EPHX1	2052	NY8	HNF1Ash2	1.62447	0.699971	up
EPHX4	253152	NY8	HNF1Ash2	0.635049	-0.65506	down
EPS8L2	64787	NY15	HNF1Ash1	0.644601	-0.633522	down
EPS8L2	64787	NY15	HNF1Ash2	0.56063	-0.83488	down
EPS8L3	79574	NY15	HNF1Ash1	0.333059	-1.58615	down
EPS8L3	79574	NY15	HNF1Ash2	0.326429	-1.61516	down
EPS8L3	79574	NY8	HNF1Ash1	0.378553	-1.40143	down
EPS8L3	79574	NY8	HNF1Ash2	0.209637	-2.25404	down
ERBB3	2065	NY15	HNF1Ash1	0.47158	-1.08442	down
ERBB3	2065	NY15	HNF1Ash2	0.440214	-1.18372	down
ERBB3	2065	NY8	HNF1Ash1	0.566795	-0.8191	down
ERBB3	2065	NY8	HNF1Ash2	0.345204	-1.53448	down
ESAM	90952	NY15	HNF1Ash1	0.588673	-0.76446	down
ESAM	90952	NY15	HNF1Ash2	0.642044	-0.639256	down
ESRG	790952	NY15	HNF1Ash1	0.44535	-1.16699	down
ESRG	790952	NY15	HNF1Ash2	0.390582	-1.3563	down
ESRG	790952	NY8	HNF1Ash1	0.584787	-0.774016	down
ESRG	790952	NY8	HNF1Ash2	0.499737	-1.00076	down
ESRP1	54845	NY15	HNF1Ash1	0.309337	-1.69275	down
ESRP1	54845	NY15	HNF1Ash2	0.198995	-2.32919	down
ESRP1	54845	NY8	HNF1Ash2	0.267523	-1.90226	down
ETHE1	23474	NY15	HNF1Ash2	0.639691	-0.644553	down
F11R	50848	NY15	HNF1Ash1	0.531936	-0.910675	down
F11R	50848	NY15	HNF1Ash2	0.419613	-1.25287	down
F11R	50848	NY8	HNF1Ash2	0.473413	-1.07883	down
F2RL1	2150	NY15	HNF1Ash1	0.464874	-1.10509	down
F2RL1	2150	NY15	HNF1Ash2	0.429662	-1.21873	down
F2RL1	2150	NY8	HNF1Ash2	0.615448	-0.700291	down
FABP4	2167	NY15	HNF1Ash1	3.04324	1.60561	up
FABP4	2167	NY15	HNF1Ash2	3.30404	1.72423	up
FABP4	2167	NY8	HNF1Ash2	1.97628	0.982787	up
FABP5	2171	NY15	HNF1Ash1	1.88196	0.912239	up
FABP5	2171	NY15	HNF1Ash2	1.79329	0.842612	up
FAM105A	54491	NY15	HNF1Ash2	1.92818	0.947238	up
FAM105A	54491	NY8	HNF1Ash2	1.51158	0.596055	up
FAM107B	83641	NY8	HNF1Ash1	0.656796	-0.606483	down
FAM107B	83641	NY8	HNF1Ash2	0.658865	-0.601945	down
FAM108C1	58489	NY15	HNF1Ash1	0.501533	-0.995583	down
FAM108C1	58489	NY15	HNF1Ash2	0.475215	-1.07335	down
FAM108C1	58489	NY8	HNF1Ash1	0.624057	-0.68025	down
FAM108C1	58489	NY8	HNF1Ash2	0.578699	-0.789116	down
FAM110C	642273	NY15	HNF1Ash1	0.27465	-1.86433	down
FAM110C	642273	NY15	HNF1Ash2	0.244444	-2.03242	down
FAM110C	642273	NY8	HNF1Ash1	0.329148	-1.60319	down
FAM110C	642273	NY8	HNF1Ash2	0.233454	-2.09879	down
FAM117B	150864	NY15	HNF1Ash2	0.634776	-0.655681	down
FAM126A	84668	NY15	HNF1Ash1	1.67012	0.73995	up
FAM126A	84668	NY15	HNF1Ash2	1.63885	0.712685	up
FAM127B	26071	NY8	HNF1Ash2	1.59776	0.676049	up
FAM135A	57579	NY15	HNF1Ash1	0.556265	-0.846155	down
FAM135A	57579	NY15	HNF1Ash2	0.516557	-0.953	down
FAM135A	57579	NY8	HNF1Ash2	0.666641	-0.585017	down
FAM174B	400451	NY8	HNF1Ash2	1.517	0.601222	up
FAM198B	51313	NY15	HNF1Ash2	0.657603	-0.604711	down
FAM20C	56975	NY8	HNF1Ash2	1.5163	0.600556	up
FAM215A	23591	NY8	HNF1Ash1	0.550538	-0.861085	down
FAM21A	387680	NY8	HNF1Ash2	2.29844	1.20065	up
FAM3C	10447	NY15	HNF1Ash1	0.610693	-0.711481	down
FAM3C	10447	NY15	HNF1Ash2	0.600384	-0.736043	down
FAM3C	10447	NY8	HNF1Ash2	0.62278	-0.683206	down
FAM46A	55603	NY8	HNF1Ash1	1.51143	0.595918	up
FAM46C	54855	NY15	HNF1Ash1	2.13851	1.0966	up
FAM46C	54855	NY15	HNF1Ash2	2.41623	1.27275	up
FAM55B	120406	NY15	HNF1Ash1	0.459694	-1.12126	down
FAM55B	120406	NY15	HNF1Ash2	0.29816	-1.74584	down
FAM55B	120406	NY8	HNF1Ash1	0.588622	-0.764588	down
FAM55B	120406	NY8	HNF1Ash2	0.365482	-1.45213	down
FAM55C	91775	NY15	HNF1Ash1	1.51594	0.600211	up
FAM59A	64762	NY15	HNF1Ash1	0.663588	-0.591641	down
FAM59A	64762	NY15	HNF1Ash2	0.606461	-0.721514	down
FAM65A	79567	NY8	HNF1Ash1	1.50965	0.594215	up
FAM83H	286077	NY15	HNF1Ash1	0.61358	-0.704676	down
FAM83H	286077	NY15	HNF1Ash2	0.57651	-0.794583	down
FAM84B	157638	NY15	HNF1Ash1	0.630505	-0.665421	down
FAM84B	157638	NY15	HNF1Ash2	0.514314	-0.959279	down
FAM84B	157638	NY8	HNF1Ash1	0.596248	-0.746016	down
FAM84B	157638	NY8	HNF1Ash2	0.585775	-0.771582	down
FAM92A1	137392	NY15	HNF1Ash1	1.50732	0.591988	up
FAM98A	25940	NY15	HNF1Ash2	1.68345	0.751417	up
FASN	2194	NY15	HNF1Ash2	1.72203	0.784108	up
FER1L6	654463	NY8	HNF1Ash1	0.425523	-1.23269	down
FER1L6	654463	NY8	HNF1Ash2	0.394757	-1.34096	down
FERMT1	55612	NY15	HNF1Ash1	0.271845	-1.87914	down	yes
FERMT1	55612	NY15	HNF1Ash2	0.237561	-2.07363	down	yes
FERMT1	55612	NY8	HNF1Ash1	0.45446	-1.13778	down	yes
FERMT1	55612	NY8	HNF1Ash2	0.380616	-1.39359	down	yes
FGD4	121512	NY15	HNF1Ash1	0.489753	-1.02987	down	yes
FGD4	121512	NY15	HNF1Ash2	0.433033	-1.20745	down	yes
FGD4	121512	NY8	HNF1Ash1	0.498965	-1.00299	down	yes
FGD4	121512	NY8	HNF1Ash2	0.428762	-1.22175	down	yes
FGD6	55785	NY15	HNF1Ash1	0.647363	-0.627353	down
FGD6	55785	NY15	HNF1Ash2	0.544583	-0.876777	down
FGD6	55785	NY8	HNF1Ash2	0.59868	-0.740143	down
FGFBP1	9982	NY15	HNF1Ash1	0.430919	-1.21451	down
FGFBP1	9982	NY15	HNF1Ash2	0.376495	-1.4093	down
FGFBP1	9982	NY8	HNF1Ash1	0.585445	-0.772394	down
FGFBP1	9982	NY8	HNF1Ash2	0.466317	-1.10062	down
FGFR1	2260	NY15	HNF1Ash1	1.65237	0.724534	up
FGFR1	2260	NY15	HNF1Ash2	1.65905	0.730361	up
FIGF	2277	NY15	HNF1Ash2	1.60092	0.678904	up
FKBP10	60681	NY15	HNF1Ash2	1.59373	0.672412	up
FKSG29	NA	NY8	HNF1Ash1	1.55075	0.632963	up
FLJ42709	441094	NY15	HNF1Ash1	1.57281	0.653346	up
FLJ42709	441094	NY15	HNF1Ash2	1.5863	0.665667	up
FLNB	2317	NY15	HNF1Ash1	0.572891	-0.803669	down
FLNB	2317	NY15	HNF1Ash2	0.502663	-0.992338	down
FLRT3	23767	NY15	HNF1Ash1	0.641777	-0.639856	down
FLRT3	23767	NY15	HNF1Ash2	0.615271	-0.700707	down
FLRT3	23767	NY8	HNF1Ash1	0.574593	-0.799387	down
FLRT3	23767	NY8	HNF1Ash2	0.449927	-1.15224	down
FMO5	2330	NY15	HNF1Ash1	0.530379	-0.914903	down
FMO5	2330	NY15	HNF1Ash2	0.257778	-1.9558	down
FMO5	2330	NY8	HNF1Ash1	0.601304	-0.733833	down
FMO5	2330	NY8	HNF1Ash2	0.560092	-0.836263	down
FN1	2335	NY15	HNF1Ash1	2.12532	1.08768	up
FN1	2335	NY15	HNF1Ash2	1.98339	0.987967	up
FOS	2353	NY15	HNF1Ash2	0.657615	-0.604686	down
FOS	2353	NY8	HNF1Ash1	0.633076	-0.659548	down
FOS	2353	NY8	HNF1Ash2	0.573876	-0.801189	down
FOXC1	2296	NY8	HNF1Ash2	2.08579	1.06059	up
FOXL1	2300	NY8	HNF1Ash1	0.648107	-0.625696	down
FOXL1	2300	NY8	HNF1Ash2	0.530334	-0.915026	down
FRK	2444	NY15	HNF1Ash2	0.639091	-0.645908	down
FRMD3	257019	NY15	HNF1Ash2	0.627096	-0.673242	down
FRMD4B	23150	NY15	HNF1Ash1	0.653547	-0.613637	down
FRMD4B	23150	NY15	HNF1Ash2	0.537453	-0.895791	down
FRMD4B	23150	NY8	HNF1Ash2	0.627097	-0.673239	down
FRMD5	84978	NY15	HNF1Ash1	0.599247	-0.738778	down
FRMD5	84978	NY15	HNF1Ash2	0.526266	-0.926136	down
FRMD5	84978	NY8	HNF1Ash2	0.637012	-0.650608	down
FRRS1	391059	NY15	HNF1Ash2	0.615388	-0.700432	down
FST	10468	NY15	HNF1Ash1	0.591292	-0.758056	down
FST	10468	NY15	HNF1Ash2	0.581283	-0.782687	down
FTL	2512	NY15	HNF1Ash1	1.50974	0.594299	up
FTL	2512	NY15	HNF1Ash2	1.78881	0.838999	up
FUT11	170384	NY8	HNF1Ash2	1.5054	0.590142	up
FUT2	2524	NY15	HNF1Ash1	0.514875	-0.957707	down
FUT2	2524	NY15	HNF1Ash2	0.533323	-0.906918	down
FUT2	2524	NY8	HNF1Ash2	0.602871	-0.730078	down
FUT4	2526	NY15	HNF1Ash1	0.46676	-1.09925	down
FUT4	2526	NY15	HNF1Ash2	0.418117	-1.25802	down
FUT4	2526	NY8	HNF1Ash1	0.507715	-0.977908	down
FUT4	2526	NY8	HNF1Ash2	0.38385	-1.38138	down
FUT8	2530	NY15	HNF1Ash1	0.562515	-0.830036	down
FUT8	2530	NY15	HNF1Ash2	0.495865	-1.01198	down
FUT8	2530	NY8	HNF1Ash2	0.588883	-0.763947	down
FZD5	7855	NY15	HNF1Ash2	0.584677	-0.774289	down
FZD7	8324	NY8	HNF1Ash2	1.60207	0.679935	up
G0S2	50486	NY8	HNF1Ash2	2.04603	1.03283	up
G6PD	2539	NY15	HNF1Ash2	1.7537	0.810406	up
G6PD	2539	NY8	HNF1Ash2	1.51184	0.596309	up
GALC	2581	NY15	HNF1Ash1	0.610139	-0.712791	down
GALC	2581	NY15	HNF1Ash2	0.595224	-0.748496	down
GALC	2581	NY8	HNF1Ash2	0.635593	-0.653826	down
GALNT5	11227	NY15	HNF1Ash1	0.519964	-0.943516	down
GALNT5	11227	NY15	HNF1Ash2	0.529574	-0.917097	down
GALNT5	11227	NY8	HNF1Ash1	0.626414	-0.674811	down
GALNT5	11227	NY8	HNF1Ash2	0.507707	-0.977933	down
GATA2	2624	NY15	HNF1Ash1	1.65739	0.72891	up
GATA2	2624	NY15	HNF1Ash2	1.55444	0.636398	up
GATA2	2624	NY8	HNF1Ash1	1.53072	0.614209	up
GBP4	115361	NY8	HNF1Ash2	1.76487	0.819562	up
GCKR	2646	NY8	HNF1Ash1	0.515278	-0.956577	down
GCKR	2646	NY8	HNF1Ash2	0.638154	-0.648023	down
GCLM	2730	NY15	HNF1Ash1	1.56342	0.644704	up
GCLM	2730	NY15	HNF1Ash2	1.59925	0.677398	up
GCNT3	9245	NY15	HNF1Ash1	0.324202	-1.62503	down
GCNT3	9245	NY15	HNF1Ash2	0.239105	-2.06428	down
GCNT3	9245	NY8	HNF1Ash1	0.328972	-1.60396	down
GCNT3	9245	NY8	HNF1Ash2	0.21483	-2.21873	down
GDA	9615	NY15	HNF1Ash1	0.484258	-1.04615	down
GDA	9615	NY15	HNF1Ash2	0.493204	-1.01974	down
GDA	9615	NY8	HNF1Ash1	0.39215	-1.35052	down
GDA	9615	NY8	HNF1Ash2	0.406996	-1.29691	down
GDI1	2664	NY8	HNF1Ash2	1.53773	0.620805	up
GGT6	124975	NY8	HNF1Ash1	0.511042	-0.968485	down
GJA1	2697	NY15	HNF1Ash1	1.94625	0.960694	up
GJA1	2697	NY15	HNF1Ash2	1.91362	0.936305	up
GJA1	2697	NY8	HNF1Ash2	1.819	0.863143	up
GLA	2717	NY8	HNF1Ash2	1.87925	0.910156	up
GMDS	2762	NY8	HNF1Ash1	0.664858	-0.588882	down
GNE	10020	NY15	HNF1Ash2	0.604838	-0.72538	down
GNG11	2791	NY15	HNF1Ash1	2.05477	1.03898	up
GNG11	2791	NY15	HNF1Ash2	2.31075	1.20836	up
GPR1	2825	NY15	HNF1Ash1	1.50678	0.591473	up
GPR1	2825	NY15	HNF1Ash2	1.74797	0.805683	up
GPR1	2825	NY8	HNF1Ash1	1.58606	0.665443	up
GPR1	2825	NY8	HNF1Ash2	1.98953	0.992426	up
GPR110	266977	NY15	HNF1Ash1	0.410342	-1.2851	down
GPR110	266977	NY15	HNF1Ash2	0.421992	-1.24471	down
GPR110	266977	NY8	HNF1Ash1	0.436805	-1.19494	down
GPR110	266977	NY8	HNF1Ash2	0.387556	-1.36753	down
GPR126	57211	NY15	HNF1Ash1	0.664446	-0.589776	down
GPR126	57211	NY15	HNF1Ash2	0.56637	-0.820184	down
GPR126	57211	NY8	HNF1Ash1	0.632638	-0.660548	down
GPR126	57211	NY8	HNF1Ash2	0.558197	-0.841154	down
GPR173	54328	NY15	HNF1Ash1	1.51944	0.60354	up
GPR39	2863	NY15	HNF1Ash1	0.597768	-0.742342	down
GPR39	2863	NY15	HNF1Ash2	0.577646	-0.791742	down
GPR87	53836	NY15	HNF1Ash1	0.588816	-0.76411	down
GPR87	53836	NY15	HNF1Ash2	0.549358	-0.864182	down
GPR87	53836	NY8	HNF1Ash2	0.63892	-0.646294	down
GPRC5A	9052	NY15	HNF1Ash1	0.468263	-1.09461	down
GPRC5A	9052	NY15	HNF1Ash2	0.393679	-1.34491	down
GPRC5A	9052	NY8	HNF1Ash1	0.58375	-0.776577	down
GPRC5A	9052	NY8	HNF1Ash2	0.499271	-1.00211	down
GPX2	2877	NY15	HNF1Ash1	0.202955	-2.30077	down
GPX2	2877	NY15	HNF1Ash2	0.101213	-3.30453	down
GPX2	2877	NY8	HNF1Ash1	0.230611	-2.11647	down
GPX2	2877	NY8	HNF1Ash2	0.0377399	-4.72777	down
GREB1L	80000	NY15	HNF1Ash1	0.535296	-0.901591	down
GREB1L	80000	NY15	HNF1Ash2	0.598699	-0.740096	down
GREB1L	80000	NY8	HNF1Ash1	0.656773	-0.606534	down
HAVCR1	26762	NY15	HNF1Ash1	0.64224	-0.638816	down
HAVCR1	26762	NY15	HNF1Ash2	0.589484	-0.762475	down
HAVCR1	26762	NY8	HNF1Ash1	0.507009	-0.979916	down
HAVCR1	26762	NY8	HNF1Ash2	0.481367	-1.05479	down
HEG1	57493	NY15	HNF1Ash1	2.72369	1.44556	up
HEG1	57493	NY15	HNF1Ash2	2.81422	1.49274	up
HEG1	57493	NY8	HNF1Ash1	1.95371	0.966219	up
HEG1	57493	NY8	HNF1Ash2	2.15278	1.1062	up
HEXIM1	10614	NY15	HNF1Ash1	1.52785	0.611501	up
HGD	3081	NY8	HNF1Ash1	0.31043	-1.68766	down
HGD	3081	NY8	HNF1Ash2	0.201579	-2.31058	down
HHEX	3087	NY8	HNF1Ash2	1.52899	0.612579	up
HILPDA	29923	NY8	HNF1Ash2	1.5072	0.59187	up
HIST1H1D	3007	NY8	HNF1Ash2	0.666621	-0.585062	down	yes
HIST1H2AB	8335	NY8	HNF1Ash1	0.453	-1.14242	down
HIST1H2AD	3013	NY8	HNF1Ash1	1.90731	0.931541	up
HIST1H2AE	3012	NY8	HNF1Ash2	0.628937	-0.669012	neither
HIST1H2BE	8344	NY8	HNF1Ash1	1.86659	0.900408	neither
HIST1H2BF	8343	NY8	HNF1Ash1	0.646427	-0.629441	down
HIST1H2BF	8343	NY8	HNF1Ash2	0.61122	-0.710236	down
HIST1H2BL	8340	NY8	HNF1Ash2	0.501462	-0.995788	down
HIST1H2BM	8342	NY8	HNF1Ash1	0.581177	-0.782951	neither
HIST1H2BN	8341	NY8	HNF1Ash2	1.60063	0.678637	up
HIST1H3A	8350	NY8	HNF1Ash1	2.16632	1.11524	neither
HIST1H3H	8357	NY8	HNF1Ash2	0.272931	-1.87339	neither
HIST3H2BB	128312	NY8	HNF1Ash1	1.5053	0.590049	up
HIST3H2BB	128312	NY8	HNF1Ash2	1.74336	0.801874	up
HKDC1	80201	NY15	HNF1Ash1	0.52781	-0.921909	down
HKDC1	80201	NY15	HNF1Ash2	0.528959	-0.918772	down
HKDC1	80201	NY8	HNF1Ash1	0.511653	-0.966761	down
HKDC1	80201	NY8	HNF1Ash2	0.428366	-1.22308	down
HMGB3P1	128872	NY8	HNF1Ash2	1.61147	0.688381	up
HMOX1	3162	NY15	HNF1Ash1	2.65435	1.40836	up
HMOX1	3162	NY15	HNF1Ash2	2.27498	1.18585	up
HMOX1	3162	NY8	HNF1Ash1	1.65349	0.725517	up
HMOX1	3162	NY8	HNF1Ash2	1.74142	0.800266	up
HNF4A	3172	NY15	HNF1Ash1	0.321737	-1.63604	down	yes
HNF4A	3172	NY15	HNF1Ash2	0.309904	-1.69011	down	yes
HNF4A	3172	NY8	HNF1Ash1	0.381426	-1.39053	down	yes
HNF4A	3172	NY8	HNF1Ash2	0.235996	-2.08316	down	yes
HNF4G	3174	NY15	HNF1Ash1	0.635369	-0.654333	down
HNF4G	3174	NY15	HNF1Ash2	0.576504	-0.794598	down
HNF4G	3174	NY8	HNF1Ash1	0.582315	-0.78013	down
HNF4G	3174	NY8	HNF1Ash2	0.448673	-1.15626	down
HOXA2	3199	NY8	HNF1Ash1	0.646908	-0.628368	down
HOXA6	3203	NY8	HNF1Ash2	1.79118	0.840909	neither
HOXB7	3217	NY8	HNF1Ash1	0.615788	-0.699495	down
HOXC12	3228	NY8	HNF1Ash2	0.575523	-0.797055	down
HOXC13	3229	NY15	HNF1Ash2	0.531796	-0.911055	down
HS3ST1	9957	NY15	HNF1Ash1	0.323088	-1.63	down
HS3ST1	9957	NY15	HNF1Ash2	0.304149	-1.71715	down
HS3ST1	9957	NY8	HNF1Ash1	0.475877	-1.07134	down
HS3ST1	9957	NY8	HNF1Ash2	0.385723	-1.37436	down
HSD17B2	3294	NY15	HNF1Ash1	0.302485	-1.72507	down
HSD17B2	3294	NY15	HNF1Ash2	0.288922	-1.79125	down
HSD17B2	3294	NY8	HNF1Ash2	0.603577	-0.728389	down
HSPA2	3306	NY8	HNF1Ash1	1.8002	0.848157	up
HSPA2	3306	NY8	HNF1Ash2	2.22941	1.15667	up
HSPG2	3339	NY15	HNF1Ash1	0.530539	-0.914469	down	yes
HSPG2	3339	NY15	HNF1Ash2	0.517712	-0.949777	down	yes
HSPG2	3339	NY8	HNF1Ash2	0.538179	-0.893843	down	yes
IER2	9592	NY8	HNF1Ash2	0.639611	-0.644732	down
IER5L	389792	NY8	HNF1Ash1	1.88696	0.916061	up
IFITM10	402778	NY15	HNF1Ash1	3.05291	1.61019	up
IFITM10	402778	NY15	HNF1Ash2	3.28529	1.71602	up
IFITM10	402778	NY8	HNF1Ash1	2.18239	1.12591	up
IFITM10	402778	NY8	HNF1Ash2	3.00348	1.58664	up
IFITM2	10581	NY8	HNF1Ash1	1.77058	0.824224	up
IFITM2	10581	NY8	HNF1Ash2	1.84072	0.880273	up
IFNAR2	3455	NY15	HNF1Ash2	0.649154	-0.623367	down
IFNAR2	3455	NY8	HNF1Ash2	0.602815	-0.730213	down
IFNGR1	3459	NY15	HNF1Ash1	0.652202	-0.61661	down
IFNGR1	3459	NY15	HNF1Ash2	0.55197	-0.857337	down
IFNGR2	3460	NY15	HNF1Ash2	0.63873	-0.646721	down
IGFBP1	3484	NY15	HNF1Ash1	0.443312	-1.17361	down	yes
IGFBP1	3484	NY15	HNF1Ash2	0.442946	-1.1748	down	yes
IGFBP1	3484	NY8	HNF1Ash2	0.500045	-0.999869	down	yes
IL20RA	53832	NY15	HNF1Ash1	0.559751	-0.837143	down
IL20RA	53832	NY15	HNF1Ash2	0.574667	-0.799202	down
IL20RA	53832	NY8	HNF1Ash1	0.525421	-0.928455	down
IL20RA	53832	NY8	HNF1Ash2	0.438858	-1.18817	down
IL28RA	163702	NY15	HNF1Ash1	0.596338	-0.745799	down
IL28RA	163702	NY15	HNF1Ash2	0.595859	-0.746957	down
IL31RA	133396	NY15	HNF1Ash2	0.665007	-0.588558	down
IL6	3569	NY15	HNF1Ash1	2.43072	1.28138	up
IL6	3569	NY15	HNF1Ash2	2.28043	1.18931	up
IL6	3569	NY8	HNF1Ash2	1.87428	0.906336	up
IMP3	55272	NY8	HNF1Ash1	1.88438	0.91409	up
IMP3	55272	NY8	HNF1Ash2	1.81127	0.856999	up
INADL	10207	NY15	HNF1Ash1	0.498764	-1.00357	down
INADL	10207	NY15	HNF1Ash2	0.45425	-1.13844	down
INADL	10207	NY8	HNF1Ash2	0.564011	-0.826204	down
INE2	8551	NY8	HNF1Ash1	0.578407	-0.789842	down
INO80C	125476	NY8	HNF1Ash2	0.629605	-0.66748	down
INPP1	3628	NY8	HNF1Ash1	0.649044	-0.623612	down
INPP1	3628	NY8	HNF1Ash2	0.665979	-0.586451	down
INSC	387755	NY15	HNF1Ash1	0.351869	-1.50689	down
INSC	387755	NY15	HNF1Ash2	0.299699	-1.73841	down
INSC	387755	NY8	HNF1Ash1	0.485168	-1.04344	down
INSC	387755	NY8	HNF1Ash2	0.334027	-1.58196	down
INSIG2	51141	NY15	HNF1Ash2	0.665715	-0.587023	down
IPO4	79711	NY15	HNF1Ash2	1.66016	0.731321	up
IRF2BPL	64207	NY15	HNF1Ash1	2.33152	1.22127	up
IRF2BPL	64207	NY15	HNF1Ash2	2.27942	1.18867	up
IRS2	8660	NY15	HNF1Ash2	0.589996	-0.761222	down
IRS2	8660	NY8	HNF1Ash2	0.665197	-0.588146	down
ISOC2	79763	NY8	HNF1Ash1	1.53845	0.621476	up
ITGA6	3655	NY15	HNF1Ash1	0.506195	-0.982234	down
ITGA6	3655	NY15	HNF1Ash2	0.460287	-1.11939	down
ITGA6	3655	NY8	HNF1Ash2	0.603119	-0.729485	down
ITGB4	3691	NY15	HNF1Ash1	0.650026	-0.62143	down
ITGB4	3691	NY15	HNF1Ash2	0.581523	-0.782091	down
ITGB6	3694	NY15	HNF1Ash1	0.37412	-1.41843	down
ITGB6	3694	NY15	HNF1Ash2	0.272046	-1.87808	down
ITGB6	3694	NY8	HNF1Ash1	0.663466	-0.591904	down
ITGB6	3694	NY8	HNF1Ash2	0.462212	-1.11337	down
ITPR2	3709	NY15	HNF1Ash1	2.09043	1.0638	up
ITPR2	3709	NY15	HNF1Ash2	1.91308	0.935898	up
ITPR2	3709	NY8	HNF1Ash1	1.6894	0.756512	up
ITPR2	3709	NY8	HNF1Ash2	1.64957	0.722088	up
JDP2	122953	NY8	HNF1Ash2	0.646834	-0.628533	down
JPH1	56704	NY15	HNF1Ash1	0.316723	-1.65871	down	yes
JPH1	56704	NY15	HNF1Ash2	0.279396	-1.83962	down	yes
JPH1	56704	NY8	HNF1Ash1	0.486796	-1.03861	down	yes
JPH1	56704	NY8	HNF1Ash2	0.357028	-1.48589	down	yes
JUP	3728	NY15	HNF1Ash2	0.579458	-0.787224	down
KBTBD12	166348	NY15	HNF1Ash1	0.60379	-0.72788	down
KBTBD12	166348	NY15	HNF1Ash2	0.635767	-0.65343	down
KBTBD12	166348	NY8	HNF1Ash2	0.480914	-1.05615	down
KCNK1	3775	NY15	HNF1Ash1	0.546342	-0.872125	down
KCNK1	3775	NY15	HNF1Ash2	0.506524	-0.981297	down
KCNK1	3775	NY8	HNF1Ash1	0.657276	-0.605429	down
KCNK1	3775	NY8	HNF1Ash2	0.596541	-0.745307	down
KCNK5	8645	NY15	HNF1Ash1	0.506705	-0.980782	down
KCNK5	8645	NY15	HNF1Ash2	0.40062	-1.31969	down
KCNK5	8645	NY8	HNF1Ash1	0.565691	-0.821913	down
KCNK5	8645	NY8	HNF1Ash2	0.380985	-1.39219	down
KCNQ1OT1	10984	NY15	HNF1Ash1	1.7277	0.788856	up
KCNQ1OT1	10984	NY15	HNF1Ash2	1.60042	0.678451	up
KCNRG	283518	NY8	HNF1Ash1	0.642526	-0.638172	neither
KIAA0040	9674	NY15	HNF1Ash1	0.322609	-1.63214	down
KIAA0040	9674	NY15	HNF1Ash2	0.275992	-1.8573	down
KIAA0040	9674	NY8	HNF1Ash1	0.409714	-1.28731	down
KIAA0040	9674	NY8	HNF1Ash2	0.30948	-1.69208	down
KIAA0182	23199	NY8	HNF1Ash2	1.56457	0.645762	up
KIAA1199	57214	NY8	HNF1Ash1	0.62016	-0.689288	down
KIAA1199	57214	NY8	HNF1Ash2	0.480705	-1.05678	down
KIAA1244	57221	NY15	HNF1Ash1	0.561528	-0.832571	down
KIAA1244	57221	NY15	HNF1Ash2	0.507545	-0.978391	down
KIAA1377	57562	NY15	HNF1Ash1	0.473078	-1.07985	down
KIAA1377	57562	NY15	HNF1Ash2	0.434874	-1.20133	down
KIAA1377	57562	NY8	HNF1Ash2	0.604119	-0.727096	down
KIAA1522	57648	NY15	HNF1Ash1	0.586461	-0.769893	down
KIAA1522	57648	NY15	HNF1Ash2	0.586001	-0.771026	down
KIF13B	23303	NY15	HNF1Ash1	0.489614	-1.03028	down
KIF13B	23303	NY15	HNF1Ash2	0.449032	-1.15511	down
KIF13B	23303	NY8	HNF1Ash1	0.653244	-0.614306	down
KIF13B	23303	NY8	HNF1Ash2	0.566926	-0.818767	down
KIF16B	55614	NY15	HNF1Ash2	0.627807	-0.671606	down
KIRREL	55243	NY15	HNF1Ash1	1.58439	0.663924	up
KIRREL	55243	NY15	HNF1Ash2	1.50798	0.592618	up
KLF3	51274	NY15	HNF1Ash1	0.620341	-0.688867	down
KLF3	51274	NY15	HNF1Ash2	0.546391	-0.871994	down
KLF3	51274	NY8	HNF1Ash1	0.652391	-0.616192	down
KLF3	51274	NY8	HNF1Ash2	0.570054	-0.810829	down
KLF5	688	NY15	HNF1Ash1	0.508808	-0.974808	down
KLF5	688	NY15	HNF1Ash2	0.491043	-1.02608	down
KLF5	688	NY8	HNF1Ash2	0.590934	-0.75893	down
LAMB3	3914	NY15	HNF1Ash1	0.459684	-1.12129	down
LAMB3	3914	NY15	HNF1Ash2	0.393462	-1.3457	down
LAMB3	3914	NY8	HNF1Ash1	0.508967	-0.974357	down
LAMB3	3914	NY8	HNF1Ash2	0.329546	-1.60145	down
LAMC2	3918	NY15	HNF1Ash1	0.230675	-2.11607	down
LAMC2	3918	NY15	HNF1Ash2	0.193902	-2.3666	down
LAMC2	3918	NY8	HNF1Ash1	0.406094	-1.30011	down
LAMC2	3918	NY8	HNF1Ash2	0.23194	-2.10818	down
LCN2	3934	NY15	HNF1Ash1	0.248287	-2.00992	down
LCN2	3934	NY15	HNF1Ash2	0.0900623	-3.47293	down
LCN2	3934	NY8	HNF1Ash1	0.440136	-1.18398	down
LCN2	3934	NY8	HNF1Ash2	0.141751	-2.81857	down
LDB1	8861	NY8	HNF1Ash1	1.63122	0.705948	up
LEPREL1	55214	NY15	HNF1Ash1	2.54403	1.34711	up
LEPREL1	55214	NY15	HNF1Ash2	2.75805	1.46365	up
LEPREL1	55214	NY8	HNF1Ash2	1.83296	0.874172	up
LGALS3	3958	NY15	HNF1Ash1	0.597347	-0.743358	down
LGALS3	3958	NY15	HNF1Ash2	0.526141	-0.926479	down
LGALS3	3958	NY8	HNF1Ash2	0.632575	-0.660693	down
LGALS3BP	3959	NY8	HNF1Ash1	1.53806	0.621111	up
LGALS4	3960	NY15	HNF1Ash1	0.37191	-1.42697	down
LGALS4	3960	NY15	HNF1Ash2	0.300623	-1.73397	down
LGALS4	3960	NY8	HNF1Ash1	0.631009	-0.664268	down
LGALS4	3960	NY8	HNF1Ash2	0.406997	-1.29691	down
LGMN	5641	NY15	HNF1Ash1	0.652098	-0.616839	down
LGMN	5641	NY15	HNF1Ash2	0.616769	-0.697198	down
LGMN	5641	NY8	HNF1Ash1	0.661659	-0.595841	down
LGMN	5641	NY8	HNF1Ash2	0.660092	-0.599262	down
LGR4	55366	NY15	HNF1Ash1	0.642503	-0.638226	down
LGR4	55366	NY15	HNF1Ash2	0.584835	-0.7739	down
LIF	3976	NY8	HNF1Ash2	0.663709	-0.591376	down
LIFR	3977	NY15	HNF1Ash1	1.54601	0.628546	up
LIMA1	51474	NY15	HNF1Ash1	0.573666	-0.801717	down
LIMA1	51474	NY15	HNF1Ash2	0.494112	-1.01709	down
LIMA1	51474	NY8	HNF1Ash2	0.565015	-0.823639	down
LIMCH1	22998	NY15	HNF1Ash1	2.00213	1.00153	up
LIMCH1	22998	NY15	HNF1Ash2	2.30758	1.20638	up
LIMCH1	22998	NY8	HNF1Ash2	1.6993	0.764944	up
LIPH	200879	NY15	HNF1Ash1	0.524482	-0.931034	down
LIPH	200879	NY15	HNF1Ash2	0.503162	-0.990905	down
LIPH	200879	NY8	HNF1Ash1	0.622788	-0.683186	down
LIPH	200879	NY8	HNF1Ash2	0.565866	-0.821467	down
LMAN2L	81562	NY8	HNF1Ash1	1.51098	0.595481	up
LMO7	4008	NY15	HNF1Ash1	0.508281	-0.976302	down
LMO7	4008	NY15	HNF1Ash2	0.473052	-1.07993	down
LMO7	4008	NY8	HNF1Ash1	0.662604	-0.593782	down
LMO7	4008	NY8	HNF1Ash2	0.59484	-0.749427	down
LOC100128288	NA	NY8	HNF1Ash1	0.617863	-0.694642	neither
LOC100128288	NA	NY8	HNF1Ash2	0.569622	-0.811924	neither
LOC100128822	NA	NY8	HNF1Ash1	2.39726	1.26139	up
LOC100128822	NA	NY8	HNF1Ash2	2.22332	1.15271	up
LOC100129034	NA	NY8	HNF1Ash1	1.56013	0.64167	up
LOC100129550	NA	NY8	HNF1Ash1	0.64229	-0.638703	down
LOC100287314	NA	NY15	HNF1Ash2	0.666059	-0.586278	down
LOC100288198	NA	NY8	HNF1Ash2	0.600242	-0.736385	down
LOC100505633	NA	NY15	HNF1Ash1	0.432597	-1.2089	down
LOC100505633	NA	NY15	HNF1Ash2	0.360743	-1.47096	down
LOC100505633	NA	NY8	HNF1Ash1	0.444781	-1.16883	down
LOC100505633	NA	NY8	HNF1Ash2	0.367442	-1.44441	down
LOC100505817	NA	NY15	HNF1Ash1	0.256434	-1.96334	down
LOC100505817	NA	NY15	HNF1Ash2	0.228228	-2.13145	down
LOC100505817	NA	NY8	HNF1Ash1	0.309672	-1.69119	down
LOC100505817	NA	NY8	HNF1Ash2	0.204878	-2.28716	down
LOC100505839	NA	NY15	HNF1Ash1	0.639559	-0.644851	down
LOC100505839	NA	NY15	HNF1Ash2	0.525394	-0.928529	down
LOC100505839	NA	NY8	HNF1Ash2	0.507945	-0.977254	down
LOC100506054	NA	NY8	HNF1Ash1	1.64081	0.714405	up
LOC100506123	NA	NY15	HNF1Ash1	0.609165	-0.715094	down
LOC100506123	NA	NY15	HNF1Ash2	0.424775	-1.23523	down
LOC100506123	NA	NY15	HNF1Ash2	0.313186	-1.67491	down
LOC100506123	NA	NY8	HNF1Ash1	0.660879	-0.597543	down
LOC100506123	NA	NY8	HNF1Ash2	0.453757	-1.14001	down
LOC100506123	NA	NY8	HNF1Ash1	0.5748	-0.798868	down
LOC100506123	NA	NY8	HNF1Ash2	0.447533	-1.15993	down
LOC127841	NA	NY8	HNF1Ash1	0.599745	-0.737579	down
LOC127841	NA	NY8	HNF1Ash2	0.536255	-0.89901	down
LOC146880	NA	NY8	HNF1Ash1	0.646698	-0.628836	down
LOC146880	NA	NY8	HNF1Ash2	0.525817	-0.927366	down
LOC148189	NA	NY8	HNF1Ash2	0.622627	-0.683559	down
LOC152225	NA	NY15	HNF1Ash1	0.381231	-1.39126	down
LOC152225	NA	NY15	HNF1Ash2	0.373886	-1.41933	down
LOC152225	NA	NY8	HNF1Ash1	0.483893	-1.04724	down
LOC152225	NA	NY8	HNF1Ash2	0.392879	-1.34784	down
LOC201651	NA	NY8	HNF1Ash1	0.585458	-0.772362	down
LOC201651	NA	NY8	HNF1Ash2	0.661278	-0.596671	down
LOC283392	NA	NY15	HNF1Ash1	0.626552	-0.674494	down
LOC283392	NA	NY15	HNF1Ash2	0.567236	-0.81798	down
LOC283392	NA	NY8	HNF1Ash2	0.628073	-0.670995	down
LOC285033	NA	NY8	HNF1Ash1	3.46484	1.79279	up
LOC285033	NA	NY8	HNF1Ash2	3.83304	1.93849	up
LOC285359	NA	NY8	HNF1Ash1	1.99737	0.998101	up
LOC285419	NA	NY15	HNF1Ash1	0.655825	-0.608618	down
LOC285419	NA	NY15	HNF1Ash2	0.632965	-0.659802	down
LOC285419	NA	NY8	HNF1Ash2	0.654004	-0.612628	down
LOC285758	285758	NY15	HNF1Ash1	0.640081	-0.643673	down
LOC285758	285758	NY15	HNF1Ash2	0.574324	-0.800064	down
LOC285758	285758	NY8	HNF1Ash1	0.500723	-0.997914	down
LOC285758	285758	NY8	HNF1Ash2	0.442418	-1.17652	down
LOC339166	NA	NY15	HNF1Ash1	0.449334	-1.15414	down
LOC339166	NA	NY15	HNF1Ash2	0.428679	-1.22203	down
LOC339166	NA	NY8	HNF1Ash2	0.643125	-0.636828	down
LOC400655	NA	NY8	HNF1Ash2	0.578512	-0.789582	down
LOC439990	NA	NY8	HNF1Ash1	0.644441	-0.633881	down
LOC439990	NA	NY8	HNF1Ash2	0.533518	-0.90639	down
LOC645431	NA	NY8	HNF1Ash1	0.610276	-0.712467	down
LOC645431	NA	NY8	HNF1Ash2	0.414075	-1.27204	down
LOC728640	NA	NY8	HNF1Ash1	0.503577	-0.989717	down
LOC728643	NA	NY8	HNF1Ash1	0.608925	-0.715665	down
LOC730091	NA	NY15	HNF1Ash1	0.650992	-0.619289	down
LOC730102	NA	NY8	HNF1Ash2	0.584446	-0.774857	down
LOC93622	NA	NY8	HNF1Ash1	1.51874	0.602876	up
LOX	4015	NY15	HNF1Ash1	1.73421	0.794282	up
LOX	4015	NY15	HNF1Ash2	1.57306	0.653572	up
LOXL1	4016	NY15	HNF1Ash2	1.63823	0.712134	up
LPCAT4	254531	NY15	HNF1Ash2	0.639402	-0.645205	down
LPCAT4	254531	NY8	HNF1Ash2	0.644818	-0.633037	down
LPHN2	23266	NY15	HNF1Ash1	1.50872	0.593325	up
LPHN2	23266	NY15	HNF1Ash2	1.57646	0.656692	up
LRIG3	121227	NY15	HNF1Ash1	1.60147	0.679401	up
LRRC1	55227	NY15	HNF1Ash1	0.61325	-0.705452	down
LRRC1	55227	NY15	HNF1Ash2	0.565305	-0.822898	down
LRRC1	55227	NY8	HNF1Ash2	0.661139	-0.596974	down
LRRC16A	55604	NY15	HNF1Ash2	0.635086	-0.654976	down
LRRC61	65999	NY15	HNF1Ash2	0.603533	-0.728495	down
LSMD1	84316	NY8	HNF1Ash2	1.67322	0.742626	up
LSR	51599	NY15	HNF1Ash1	0.553368	-0.85369	down
LSR	51599	NY15	HNF1Ash2	0.538991	-0.891667	down
LSR	51599	NY8	HNF1Ash2	0.566574	-0.819664	down
LY6E	4061	NY8	HNF1Ash1	1.65481	0.726666	up
LYZ	4069	NY8	HNF1Ash1	0.588287	-0.765408	down
LYZ	4069	NY8	HNF1Ash2	0.523315	-0.934249	down
MAL2	114569	NY15	HNF1Ash1	0.380168	-1.39529	down
MAL2	114569	NY15	HNF1Ash2	0.34431	-1.53822	down
MAL2	114569	NY8	HNF1Ash1	0.567847	-0.816426	down
MAL2	114569	NY8	HNF1Ash2	0.443297	-1.17366	down
MALAT1	378938	NY8	HNF1Ash2	0.600695	-0.735296	down
MAMDC2	256691	NY15	HNF1Ash1	2.21504	1.14733	up
MAMDC2	256691	NY15	HNF1Ash2	1.68883	0.756025	up
MAMDC2	256691	NY8	HNF1Ash1	1.5881	0.667301	up
MANSC1	54682	NY15	HNF1Ash1	0.57225	-0.805284	down
MANSC1	54682	NY15	HNF1Ash2	0.590393	-0.760252	down
MANSC1	54682	NY8	HNF1Ash2	0.544445	-0.877142	down
MAP2K3	5606	NY15	HNF1Ash1	0.609941	-0.71326	down
MAP2K3	5606	NY15	HNF1Ash2	0.632969	-0.659793	down
MAPK3	5595	NY8	HNF1Ash2	0.591681	-0.757109	down
MARCKS	4082	NY8	HNF1Ash2	0.640188	-0.643432	down
MARVELD1	83742	NY8	HNF1Ash1	1.60032	0.678359	up
MARVELD1	83742	NY8	HNF1Ash2	1.79262	0.842068	up
MAZ	4150	NY8	HNF1Ash1	1.65418	0.726115	up
MBOAT1	154141	NY15	HNF1Ash1	0.45811	-1.12623	down
MBOAT1	154141	NY15	HNF1Ash2	0.42237	-1.24342	down
MBOAT1	154141	NY8	HNF1Ash1	0.535874	-0.900033	down
MBOAT1	154141	NY8	HNF1Ash2	0.443918	-1.17163	down
MBOAT2	129642	NY15	HNF1Ash2	0.654524	-0.611483	down
MBP	4155	NY15	HNF1Ash2	0.663521	-0.591785	down
MCU	90550	NY15	HNF1Ash1	0.61052	-0.71189	down
MCU	90550	NY15	HNF1Ash2	0.573504	-0.802124	down
MCU	90550	NY8	HNF1Ash1	0.62236	-0.684179	down
MCU	90550	NY8	HNF1Ash2	0.582117	-0.780619	down
MDK	4192	NY8	HNF1Ash2	0.638574	-0.647074	down
ME1	4199	NY15	HNF1Ash1	1.51415	0.598508	up
ME1	4199	NY15	HNF1Ash2	1.58365	0.663255	up
MERTK	10461	NY15	HNF1Ash1	0.58314	-0.778085	down
MERTK	10461	NY15	HNF1Ash2	0.530373	-0.91492	down
MET	4233	NY15	HNF1Ash2	0.634945	-0.655296	down
MFSD5	84975	NY8	HNF1Ash1	0.665475	-0.587544	down
MGC16025	NA	NY8	HNF1Ash1	2.10628	1.0747	up
MGC16025	NA	NY8	HNF1Ash2	2.12947	1.09049	up
MGC16121	84848	NY8	HNF1Ash2	1.55614	0.637967	up
MGP	4256	NY15	HNF1Ash1	3.38347	1.7585	up
MGP	4256	NY15	HNF1Ash2	3.42062	1.77426	up
MGP	4256	NY8	HNF1Ash1	2.07245	1.05134	up
MGP	4256	NY8	HNF1Ash2	2.19275	1.13274	up
MIA2	117153	NY15	HNF1Ash1	0.321349	-1.63779	down
MIA2	117153	NY15	HNF1Ash2	0.277031	-1.85188	down
MIA2	117153	NY8	HNF1Ash1	0.144728	-2.78859	down
MIA2	117153	NY8	HNF1Ash2	0.0953519	-3.39059	down
MIR210HG	100506211	NY8	HNF1Ash1	1.53102	0.614495	up
MIR548H2	100313773	NY8	HNF1Ash1	0.617557	-0.695356	down
MLLT11	10962	NY15	HNF1Ash2	1.52863	0.612244	up
MLXIP	22877	NY15	HNF1Ash2	0.592966	-0.753978	down
MMP1	4312	NY8	HNF1Ash1	0.600647	-0.735411	down
MMP28	79148	NY15	HNF1Ash1	0.409624	-1.28763	down
MMP28	79148	NY15	HNF1Ash2	0.352558	-1.50407	down
MMP28	79148	NY8	HNF1Ash1	0.544956	-0.875788	down
MMP28	79148	NY8	HNF1Ash2	0.417121	-1.26146	down
MOK	5891	NY15	HNF1Ash1	1.59273	0.671504	up
MRC2	9902	NY15	HNF1Ash1	1.80879	0.855024	up
MRC2	9902	NY15	HNF1Ash2	1.68727	0.754695	up
MRC2	9902	NY8	HNF1Ash2	1.5198	0.603885	up
MRPL34	64981	NY8	HNF1Ash2	1.78791	0.838277	neither
MRPL42P5	359821	NY8	HNF1Ash1	1.54264	0.625405	neither
MRPS10	55173	NY15	HNF1Ash2	0.658257	-0.603277	down
MST1R	4486	NY15	HNF1Ash1	0.446892	-1.162	down
MST1R	4486	NY15	HNF1Ash2	0.426498	-1.22939	down
MST1R	4486	NY8	HNF1Ash2	0.564329	-0.825392	down
MT1L	4500	NY8	HNF1Ash2	1.58989	0.668928	up
MTAP	4507	NY15	HNF1Ash1	0.641789	-0.639828	down
MTCP1	4515	NY8	HNF1Ash2	0.524644	-0.930589	down
MTCP1NB	100272147	NY8	HNF1Ash2	2.02919	1.0209	up
MTMR11	10903	NY15	HNF1Ash1	0.549003	-0.865115	down
MTMR11	10903	NY15	HNF1Ash2	0.603748	-0.727983	down
MTMR11	10903	NY8	HNF1Ash1	0.503639	-0.989539	down
MTMR11	10903	NY8	HNF1Ash2	0.48293	-1.05012	down
MUC13	56667	NY15	HNF1Ash1	0.512449	-0.964519	down
MUC13	56667	NY15	HNF1Ash2	0.439917	-1.1847	down
MUC13	56667	NY8	HNF1Ash1	0.337509	-1.567	down
MUC13	56667	NY8	HNF1Ash2	0.191247	-2.38649	down
MYH15	22989	NY15	HNF1Ash1	0.347714	-1.52403	down
MYH15	22989	NY15	HNF1Ash2	0.341996	-1.54795	down
MYH15	22989	NY8	HNF1Ash1	0.626099	-0.675538	down
MYH15	22989	NY8	HNF1Ash2	0.530097	-0.915672	down
MYO1E	4643	NY15	HNF1Ash2	0.662487	-0.594037	down
MYO5C	55930	NY15	HNF1Ash1	0.510623	-0.96967	down
MYO5C	55930	NY15	HNF1Ash2	0.450097	-1.15169	down
MYO5C	55930	NY8	HNF1Ash2	0.588532	-0.764808	down
MYO6	4646	NY15	HNF1Ash2	0.6251	-0.677842	down
MYO6	4646	NY8	HNF1Ash2	0.663486	-0.591862	down
NAB2	4665	NY8	HNF1Ash1	1.51033	0.594859	up
NAP1L6	645996	NY8	HNF1Ash2	2.12616	1.08825	neither
NFKBIZ	64332	NY15	HNF1Ash1	0.648081	-0.625754	down
NFKBIZ	64332	NY15	HNF1Ash2	0.563777	-0.826804	down
NFXL1	152518	NY15	HNF1Ash2	0.658522	-0.602696	down
NGRN	51335	NY15	HNF1Ash2	0.65781	-0.604257	down
NIPAL1	152519	NY15	HNF1Ash1	0.40784	-1.29392	down
NIPAL1	152519	NY15	HNF1Ash2	0.415455	-1.26724	down
NIPAL1	152519	NY8	HNF1Ash1	0.363512	-1.45993	down
NIPAL1	152519	NY8	HNF1Ash2	0.376205	-1.41041	down
NIPAL2	79815	NY8	HNF1Ash2	0.643925	-0.635036	down
NME4	4833	NY8	HNF1Ash1	1.66244	0.733298	up
NME4	4833	NY8	HNF1Ash2	1.6722	0.741747	up
NMUR2	56923	NY15	HNF1Ash1	0.129535	-2.94859	down	yes
NMUR2	56923	NY15	HNF1Ash2	0.114706	-3.12399	down	yes
NMUR2	56923	NY8	HNF1Ash1	0.0644707	-3.95521	down	yes
NMUR2	56923	NY8	HNF1Ash2	0.0171671	-5.86421	down	yes
NOV	4856	NY15	HNF1Ash1	1.79513	0.84409	up
NOV	4856	NY15	HNF1Ash2	2.02306	1.01654	up
NQO1	1728	NY15	HNF1Ash2	1.59796	0.676233	up
NR0B2	8431	NY15	HNF1Ash1	0.359869	-1.47446	down	yes
NR0B2	8431	NY15	HNF1Ash2	0.171348	-2.545	down	yes
NR0B2	8431	NY8	HNF1Ash1	0.166439	-2.58694	down	yes
NR0B2	8431	NY8	HNF1Ash2	0.140858	-2.82769	down	yes
NR2F1	7025	NY15	HNF1Ash1	1.8931	0.920748	up
NR2F1	7025	NY15	HNF1Ash2	2.03957	1.02826	up
NR2F2	7026	NY15	HNF1Ash2	1.57529	0.655616	up
NR5A2	2494	NY15	HNF1Ash1	0.23546	-2.08645	down	yes
NR5A2	2494	NY15	HNF1Ash2	0.219141	-2.19007	down	yes
NR5A2	2494	NY8	HNF1Ash1	0.375672	-1.41245	down	yes
NR5A2	2494	NY8	HNF1Ash2	0.287552	-1.7981	down	yes
NTSR1	4923	NY15	HNF1Ash1	0.648862	-0.624016	down
NTSR1	4923	NY15	HNF1Ash2	0.612157	-0.708027	down
NUAK1	9891	NY15	HNF1Ash1	1.58278	0.662465	up
NUAK1	9891	NY15	HNF1Ash2	1.53039	0.613897	up
NUMBL	9253	NY15	HNF1Ash1	1.88168	0.912025	up
NUMBL	9253	NY15	HNF1Ash2	1.64346	0.716738	up
NYAP2	57624	NY8	HNF1Ash1	0.615969	-0.69907	down
OAS1	4938	NY15	HNF1Ash1	0.399253	-1.32462	down
OAS1	4938	NY15	HNF1Ash2	0.38239	-1.38688	down
OAS1	4938	NY8	HNF1Ash1	0.657431	-0.605088	down
OAS1	4938	NY8	HNF1Ash2	0.557861	-0.842023	down
OAS3	4940	NY15	HNF1Ash1	0.664169	-0.590377	down
OBFC1	79991	NY15	HNF1Ash2	0.639879	-0.644129	down
OBFC1	79991	NY8	HNF1Ash2	0.647494	-0.62706	down
OSBPL6	114880	NY15	HNF1Ash1	1.80559	0.85247	up
OSBPL6	114880	NY15	HNF1Ash2	1.72235	0.784375	up
OSBPL6	114880	NY8	HNF1Ash2	1.55387	0.635868	up
OSGIN1	29948	NY15	HNF1Ash1	1.58985	0.668887	up
OSGIN1	29948	NY15	HNF1Ash2	1.86958	0.90271	up
OSGIN1	29948	NY8	HNF1Ash1	1.82505	0.867936	up
OSGIN1	29948	NY8	HNF1Ash2	2.17986	1.12424	up
OSR1	130497	NY8	HNF1Ash1	1.94751	0.961633	up
OSR1	130497	NY8	HNF1Ash2	1.69546	0.761677	up
P2RX4	5025	NY8	HNF1Ash1	0.600448	-0.735888	down
P2RX4	5025	NY8	HNF1Ash2	0.612134	-0.708082	down
P2RY1	5028	NY8	HNF1Ash1	0.634445	-0.656434	down
P2RY2	5029	NY15	HNF1Ash1	0.307709	-1.70036	down
P2RY2	5029	NY15	HNF1Ash2	0.269485	-1.89172	down
P2RY2	5029	NY8	HNF1Ash1	0.489897	-1.02945	down
P2RY2	5029	NY8	HNF1Ash2	0.353068	-1.50198	down
PA2G4P4	647033	NY8	HNF1Ash2	0.623217	-0.682193	down
PAK1	5058	NY15	HNF1Ash1	0.633052	-0.659603	down
PAK1	5058	NY15	HNF1Ash2	0.564031	-0.826152	down
PAPPA	5069	NY15	HNF1Ash1	1.824	0.867104	up
PAPPA	5069	NY15	HNF1Ash2	1.85366	0.890378	up
PAQR8	85315	NY15	HNF1Ash1	0.450135	-1.15157	down
PAQR8	85315	NY15	HNF1Ash2	0.486763	-1.03871	down
PAQR8	85315	NY8	HNF1Ash1	0.634896	-0.655408	down
PAQR8	85315	NY8	HNF1Ash2	0.640372	-0.643019	down
PARD6B	84612	NY15	HNF1Ash1	0.450361	-1.15084	down
PARD6B	84612	NY15	HNF1Ash2	0.414609	-1.27018	down
PARD6B	84612	NY8	HNF1Ash1	0.587112	-0.768292	down
PARD6B	84612	NY8	HNF1Ash2	0.487115	-1.03767	down
PARM1	25849	NY15	HNF1Ash1	0.643828	-0.635253	down
PARM1	25849	NY15	HNF1Ash2	0.618069	-0.694161	down
PCSK5	5125	NY15	HNF1Ash1	0.348141	-1.52226	down
PCSK5	5125	NY15	HNF1Ash2	0.34293	-1.54402	down
PCSK5	5125	NY8	HNF1Ash1	0.539037	-0.891545	down
PCSK5	5125	NY8	HNF1Ash2	0.45473	-1.13692	down
PCSK9	255738	NY8	HNF1Ash1	0.570398	-0.80996	down
PCSK9	255738	NY8	HNF1Ash2	0.424261	-1.23698	down
PDE4B	5142	NY15	HNF1Ash1	1.81823	0.862536	up
PDE4B	5142	NY15	HNF1Ash2	1.61625	0.692648	up
PDE4D	5144	NY15	HNF1Ash2	0.660317	-0.598769	down
PDLIM4	8572	NY15	HNF1Ash1	1.70823	0.772502	up
PEA15	8682	NY15	HNF1Ash2	1.51366	0.59804	up
PEAR1	375033	NY15	HNF1Ash2	0.636863	-0.650946	down
PELI2	57161	NY15	HNF1Ash1	0.662659	-0.593661	down
PELI2	57161	NY8	HNF1Ash1	0.602421	-0.731155	down
PELI2	57161	NY8	HNF1Ash2	0.623762	-0.680932	down
PERP	64065	NY15	HNF1Ash1	0.613223	-0.705516	down
PERP	64065	NY15	HNF1Ash2	0.602117	-0.731884	down
PERP	64065	NY8	HNF1Ash2	0.639356	-0.64531	down
PFDN6	10471	NY8	HNF1Ash1	2.00098	1.00071	up
PFKFB2	5208	NY15	HNF1Ash1	0.478925	-1.06213	down
PFKFB2	5208	NY15	HNF1Ash2	0.508373	-0.97604	down
PFKFB2	5208	NY8	HNF1Ash1	0.539088	-0.891407	down
PFKFB2	5208	NY8	HNF1Ash2	0.418169	-1.25784	down
PGD	5226	NY15	HNF1Ash1	1.79893	0.847143	up
PGD	5226	NY15	HNF1Ash2	1.75326	0.81004	up
PGM2L1	283209	NY15	HNF1Ash1	0.613214	-0.705538	down
PGM2L1	283209	NY15	HNF1Ash2	0.550906	-0.860123	down
PIAS3	10401	NY15	HNF1Ash2	1.61811	0.694309	up
PIK3CG	5294	NY15	HNF1Ash1	0.341493	-1.55007	down
PIK3CG	5294	NY15	HNF1Ash2	0.341269	-1.55102	down
PIK3CG	5294	NY8	HNF1Ash1	0.374243	-1.41795	down
PIK3CG	5294	NY8	HNF1Ash2	0.34732	-1.52566	down
PIWIL4	143689	NY15	HNF1Ash1	0.551722	-0.857987	down
PIWIL4	143689	NY15	HNF1Ash2	0.466242	-1.10085	down
PIWIL4	143689	NY8	HNF1Ash2	0.570225	-0.810398	down
PJA1	64219	NY8	HNF1Ash2	0.475101	-1.07369	down
PKN2	5586	NY15	HNF1Ash1	0.648186	-0.625519	down
PKN2	5586	NY15	HNF1Ash2	0.573854	-0.801245	down
PKN2	5586	NY8	HNF1Ash2	0.651831	-0.61743	down
PKP2	5318	NY15	HNF1Ash2	0.575016	-0.798327	down
PLA2R1	22925	NY15	HNF1Ash1	0.589042	-0.763559	down
PLA2R1	22925	NY15	HNF1Ash2	0.575131	-0.798039	down
PLA2R1	22925	NY8	HNF1Ash1	0.658963	-0.601731	down
PLA2R1	22925	NY8	HNF1Ash2	0.554294	-0.851275	down
PLAT	5327	NY8	HNF1Ash1	1.84899	0.886737	up
PLAT	5327	NY8	HNF1Ash2	1.93404	0.951617	up
PLCD3	113026	NY15	HNF1Ash2	0.645017	-0.632591	down
PLCL2	23228	NY15	HNF1Ash1	0.57348	-0.802185	down
PLCL2	23228	NY15	HNF1Ash2	0.513686	-0.961042	down
PLCXD2	257068	NY15	HNF1Ash1	0.520818	-0.94115	down
PLCXD2	257068	NY15	HNF1Ash2	0.474644	-1.07508	down
PLEK2	26499	NY15	HNF1Ash1	0.548505	-0.866425	down
PLEK2	26499	NY15	HNF1Ash2	0.554952	-0.849564	down
PLEKHA1	59338	NY15	HNF1Ash1	0.500939	-0.997293	down
PLEKHA1	59338	NY15	HNF1Ash2	0.498424	-1.00455	down
PLEKHA1	59338	NY8	HNF1Ash1	0.651507	-0.618148	down
PLEKHA1	59338	NY8	HNF1Ash2	0.574845	-0.798756	down
PLEKHA6	22874	NY15	HNF1Ash1	0.647016	-0.628126	down
PLEKHA6	22874	NY15	HNF1Ash2	0.579782	-0.786418	down
PLEKHA6	22874	NY8	HNF1Ash2	0.60242	-0.731159	down
PLEKHA7	144100	NY15	HNF1Ash2	0.656361	-0.607438	down
PLEKHG3	26030	NY15	HNF1Ash2	0.566614	-0.819561	down
PLEKHO1	51177	NY15	HNF1Ash1	1.6775	0.746314	up
PLEKHO1	51177	NY15	HNF1Ash2	1.54984	0.632116	up
PLOD2	5352	NY15	HNF1Ash1	1.64304	0.716366	up
PLOD2	5352	NY15	HNF1Ash2	1.53803	0.621087	up
PLS1	5357	NY15	HNF1Ash1	0.357352	-1.48458	down
PLS1	5357	NY15	HNF1Ash2	0.307073	-1.70335	down
PLS1	5357	NY8	HNF1Ash1	0.594173	-0.751045	down
PLS1	5357	NY8	HNF1Ash2	0.456842	-1.13023	down
PLSCR4	57088	NY15	HNF1Ash1	1.55869	0.640332	up
PLSCR4	57088	NY15	HNF1Ash2	1.73011	0.790865	up
PLXNA1	5361	NY8	HNF1Ash1	1.5367	0.619839	up
PLXNA2	5362	NY15	HNF1Ash1	0.62242	-0.684039	down
PLXNA2	5362	NY15	HNF1Ash2	0.542523	-0.882243	down
PMEPA1	56937	NY8	HNF1Ash2	0.602152	-0.731801	down
POLR3GL	84265	NY8	HNF1Ash2	0.573424	-0.802326	down
POLR3K	51728	NY8	HNF1Ash1	0.660144	-0.599147	down
POPDC3	64208	NY15	HNF1Ash1	1.76087	0.816288	up
POPDC3	64208	NY15	HNF1Ash2	1.64889	0.7215	up
PPIF	10105	NY15	HNF1Ash2	1.56067	0.642161	up
PPP1R13B	23368	NY15	HNF1Ash2	0.651103	-0.619043	down
PPP1R13B	23368	NY8	HNF1Ash2	0.666353	-0.585641	down
PPP1R1C	151242	NY15	HNF1Ash1	0.481153	-1.05543	down
PPP1R1C	151242	NY15	HNF1Ash2	0.48739	-1.03685	down
PPP1R1C	151242	NY8	HNF1Ash2	0.615097	-0.701114	down
PPP1R35	221908	NY8	HNF1Ash1	1.60121	0.679164	up
PPP1R3C	5507	NY8	HNF1Ash1	1.55601	0.637848	up
PPP2R2B	5521	NY15	HNF1Ash1	1.66452	0.735105	up
PPP2R2B	5521	NY15	HNF1Ash2	1.62784	0.702957	up
PPP2R2B	5521	NY8	HNF1Ash1	1.5042	0.588992	up
PRDM8	56978	NY15	HNF1Ash2	0.661047	-0.597174	down
PRELID2	153768	NY15	HNF1Ash1	0.546172	-0.872573	down
PRELID2	153768	NY15	HNF1Ash2	0.492262	-1.0225	down
PRELID2	153768	NY8	HNF1Ash2	0.610586	-0.711734	down
PRICKLE1	144165	NY15	HNF1Ash1	1.76471	0.819429	up
PRICKLE1	144165	NY15	HNF1Ash2	1.74247	0.801132	up
PRKCDBP	112464	NY8	HNF1Ash1	1.53543	0.618647	up
PRSS3	5646	NY15	HNF1Ash1	0.391754	-1.35198	down
PRSS3	5646	NY15	HNF1Ash2	0.379413	-1.39816	down
PRSS3	5646	NY8	HNF1Ash1	0.532363	-0.909518	down
PRSS3	5646	NY8	HNF1Ash2	0.473048	-1.07994	down
PRTG	283659	NY15	HNF1Ash1	1.53568	0.61888	up
PSAT1	29968	NY8	HNF1Ash2	0.544365	-0.877354	down
PSMB10	5699	NY8	HNF1Ash1	1.53474	0.617992	up
PTGIS	5740	NY8	HNF1Ash1	0.570198	-0.810466	down
PTPN13	5783	NY15	HNF1Ash1	1.67098	0.740696	up
PTPN13	5783	NY15	HNF1Ash2	1.57983	0.659772	up
PTPN3	5774	NY15	HNF1Ash2	0.649689	-0.622179	down
PTPRH	5794	NY15	HNF1Ash1	0.504542	-0.986954	down
PTPRH	5794	NY15	HNF1Ash2	0.395437	-1.33848	down
PTPRH	5794	NY8	HNF1Ash1	0.564666	-0.82453	down
PTPRH	5794	NY8	HNF1Ash2	0.491435	-1.02493	down
PYGL	5836	NY15	HNF1Ash1	1.90864	0.932542	up
PYGL	5836	NY15	HNF1Ash2	1.93914	0.955418	up
PYGL	5836	NY8	HNF1Ash2	1.66258	0.733426	up
PYROXD1	79912	NY8	HNF1Ash2	0.621924	-0.68519	down
RAB11FIP1	80223	NY8	HNF1Ash1	0.613933	-0.703848	down
RAB11FIP1	80223	NY8	HNF1Ash2	0.552397	-0.856223	down
RAB24	53917	NY8	HNF1Ash1	1.81405	0.859216	up
RAB24	53917	NY8	HNF1Ash2	1.7363	0.79602	up
RALB	5899	NY15	HNF1Ash2	0.616957	-0.696759	down
RASA1	5921	NY15	HNF1Ash1	0.64103	-0.641537	down
RASA1	5921	NY15	HNF1Ash2	0.574312	-0.800094	down
RASA1	5921	NY8	HNF1Ash2	0.575679	-0.796664	down
RASEF	158158	NY15	HNF1Ash1	0.494985	-1.01454	down
RASEF	158158	NY15	HNF1Ash2	0.482573	-1.05118	down
RASEF	158158	NY8	HNF1Ash1	0.617526	-0.695429	down
RASEF	158158	NY8	HNF1Ash2	0.501942	-0.994408	down
RASSF3	283349	NY15	HNF1Ash2	0.6581	-0.603622	down
RASSF6	166824	NY15	HNF1Ash1	0.428477	-1.22271	down
RASSF6	166824	NY15	HNF1Ash2	0.362189	-1.46519	down
RASSF6	166824	NY8	HNF1Ash1	0.519132	-0.945828	down
RASSF6	166824	NY8	HNF1Ash2	0.314933	-1.66688	down
RBM47	54502	NY15	HNF1Ash2	0.64482	-0.633033	down
RBM47	54502	NY8	HNF1Ash2	0.628568	-0.669859	down
RBMS2	5939	NY8	HNF1Ash2	0.642216	-0.638869	down
RBPMS	11030	NY15	HNF1Ash1	0.550404	-0.861436	down
RBPMS	11030	NY15	HNF1Ash2	0.496763	-1.00937	down
RBPMS	11030	NY8	HNF1Ash1	0.568338	-0.815179	down
RBPMS	11030	NY8	HNF1Ash2	0.494264	-1.01665	down
RDH5	5959	NY8	HNF1Ash2	0.66353	-0.591766	down
REEP4	80346	NY8	HNF1Ash1	1.58035	0.660248	up
REG4	83998	NY8	HNF1Ash1	0.528766	-0.9193	down
REG4	83998	NY8	HNF1Ash2	0.403214	-1.31038	down
RFFL	117584	NY15	HNF1Ash1	0.637787	-0.648853	down
RFFL	117584	NY15	HNF1Ash2	0.625191	-0.677632	down
RGS2	5997	NY8	HNF1Ash2	0.641305	-0.640917	down
RGS4	5999	NY15	HNF1Ash1	2.77027	1.47003	up
RGS4	5999	NY15	HNF1Ash2	3.30135	1.72305	up
RGS4	5999	NY8	HNF1Ash1	2.00142	1.00102	up
RGS4	5999	NY8	HNF1Ash2	2.59753	1.37714	up
RHBDL2	54933	NY15	HNF1Ash1	0.64918	-0.623311	down
RHBDL2	54933	NY15	HNF1Ash2	0.532125	-0.910164	down
RHOF	54509	NY15	HNF1Ash1	0.520136	-0.943038	down
RHOF	54509	NY15	HNF1Ash2	0.466131	-1.10119	down
RHOF	54509	NY8	HNF1Ash1	0.628573	-0.669848	down
RHOF	54509	NY8	HNF1Ash2	0.496425	-1.01035	down
RHPN2	85415	NY8	HNF1Ash2	0.654738	-0.61101	down
RIN2	54453	NY8	HNF1Ash1	0.651864	-0.617357	down
RIN2	54453	NY8	HNF1Ash2	0.605885	-0.722884	down
RIOK3	8780	NY15	HNF1Ash2	0.647957	-0.626029	down
RNF43	54894	NY8	HNF1Ash2	0.55318	-0.854179	down
RPL13AP20	387841	NY8	HNF1Ash1	0.652451	-0.616059	down
RPL13AP20	387841	NY8	HNF1Ash2	0.628595	-0.669797	down
RPP21	79897	NY8	HNF1Ash1	1.63937	0.713139	up
RPP21	79897	NY8	HNF1Ash2	1.69385	0.760307	up
RPP25	54913	NY8	HNF1Ash2	1.80499	0.85199	up
RSC1A1	6248	NY8	HNF1Ash2	1.76632	0.820745	up
S100A10	6281	NY15	HNF1Ash2	0.622917	-0.682889	down
S100A2	6273	NY8	HNF1Ash2	0.58015	-0.785501	down
S1PR3	1903	NY8	HNF1Ash2	1.59957	0.677686	up
SAMD12	401474	NY15	HNF1Ash1	0.511257	-0.96788	down
SAMD12	401474	NY15	HNF1Ash2	0.44394	-1.17156	down
SAMD12	401474	NY8	HNF1Ash1	0.609257	-0.714877	down
SAMD12	401474	NY8	HNF1Ash2	0.436362	-1.1964	down
SAMD5	389432	NY15	HNF1Ash1	0.543011	-0.880946	down	yes
SAMD5	389432	NY15	HNF1Ash2	0.477306	-1.06701	down	yes
SAMD5	389432	NY8	HNF1Ash1	0.606164	-0.722221	down	yes
SAMD5	389432	NY8	HNF1Ash2	0.650589	-0.620182	down	yes
SAT1	6303	NY15	HNF1Ash2	0.658121	-0.603575	down
SAT1	6303	NY8	HNF1Ash2	0.645503	-0.631504	down
SAV1	60485	NY15	HNF1Ash2	0.651891	-0.617298	down
SAV1	60485	NY8	HNF1Ash1	0.601896	-0.732414	down
SAV1	60485	NY8	HNF1Ash2	0.558727	-0.839784	down
SCARNA17	677769	NY8	HNF1Ash1	0.608957	-0.715589	down
SCARNA7	677767	NY8	HNF1Ash1	0.574856	-0.798729	down
SCD	6319	NY15	HNF1Ash1	1.60047	0.678493	up
SCG2	7857	NY15	HNF1Ash1	2.50676	1.32582	up
SCG2	7857	NY15	HNF1Ash2	4.69788	2.23201	up
SCO2	9997	NY8	HNF1Ash2	1.71593	0.778988	up
SDC3	9672	NY15	HNF1Ash1	1.52341	0.607302	up
SDC3	9672	NY15	HNF1Ash2	1.50554	0.59028	up
SDCBP	6386	NY15	HNF1Ash1	0.632626	-0.660575	down
SDCBP	6386	NY15	HNF1Ash2	0.617122	-0.696372	down
SDCBP	6386	NY8	HNF1Ash1	0.659008	-0.601632	down
SDCBP	6386	NY8	HNF1Ash2	0.651869	-0.617345	down
SDR16C5	195814	NY15	HNF1Ash1	0.532444	-0.909298	down
SDR16C5	195814	NY15	HNF1Ash2	0.484721	-1.04477	down
SDR16C5	195814	NY8	HNF1Ash2	0.553324	-0.853802	down
SELM	NA	NY8	HNF1Ash1	1.55648	0.638291	up
SEMA4B	10509	NY15	HNF1Ash1	0.646473	-0.629337	down
SEMA4B	10509	NY15	HNF1Ash2	0.527724	-0.922144	down
SEMA4B	10509	NY8	HNF1Ash2	0.64613	-0.630103	down
SEMA4C	54910	NY15	HNF1Ash1	2.36776	1.24352	up
SEMA4C	54910	NY15	HNF1Ash2	2.41196	1.27021	up
SERINC5	256987	NY15	HNF1Ash2	0.627415	-0.672508	down
SERPINA1	5265	NY8	HNF1Ash2	0.596218	-0.746087	down
SERPINA3	12	NY15	HNF1Ash1	0.554337	-0.851165	down
SERPINA3	12	NY15	HNF1Ash2	0.353807	-1.49896	down
SERPINA3	12	NY8	HNF1Ash2	0.396487	-1.33465	down
SERPINA5	5104	NY8	HNF1Ash2	0.533049	-0.907659	down
SERPINB1	1992	NY8	HNF1Ash2	0.637317	-0.649918	down
SERPINB5	5268	NY15	HNF1Ash1	0.434879	-1.20131	down
SERPINB5	5268	NY15	HNF1Ash2	0.358578	-1.47964	down
SERPINB5	5268	NY8	HNF1Ash2	0.523037	-0.935015	down
SERPINB9	5272	NY8	HNF1Ash2	0.666265	-0.585832	down
SESN2	83667	NY8	HNF1Ash2	0.65868	-0.602351	down
SFN	2810	NY8	HNF1Ash2	0.567432	-0.817481	down
SFR1	119392	NY15	HNF1Ash1	0.623722	-0.681026	down
SFR1	119392	NY15	HNF1Ash2	0.625183	-0.67765	down
SFR1	119392	NY8	HNF1Ash2	0.648615	-0.624566	down
SFXN5	94097	NY15	HNF1Ash1	1.52106	0.605076	up
SH2D4A	63898	NY15	HNF1Ash2	0.642427	-0.638395	down
SH3D19	152503	NY15	HNF1Ash1	0.51909	-0.945945	down
SH3D19	152503	NY15	HNF1Ash2	0.533852	-0.905488	down
SH3D19	152503	NY8	HNF1Ash1	0.651573	-0.618002	down
SHISA5	51246	NY8	HNF1Ash1	1.50066	0.585593	up
SHROOM3	57619	NY15	HNF1Ash1	0.655948	-0.608347	down
SHROOM3	57619	NY15	HNF1Ash2	0.588815	-0.764114	down
SHROOM3	57619	NY8	HNF1Ash2	0.586872	-0.768882	down
SIPA1L2	57568	NY8	HNF1Ash2	0.646774	-0.628665	down
SIX1	6495	NY15	HNF1Ash1	1.89747	0.924075	up
SIX1	6495	NY15	HNF1Ash2	1.80196	0.849567	up
SIX3	6496	NY8	HNF1Ash1	1.73918	0.79841	up
SIX3	6496	NY8	HNF1Ash2	1.81811	0.862437	up
SLC10A5	347051	NY8	HNF1Ash2	0.574745	-0.799006	down
SLC12A4	6560	NY8	HNF1Ash2	1.52934	0.61291	up
SLC14A1	6563	NY8	HNF1Ash2	0.511977	-0.96585	down
SLC16A4	9122	NY8	HNF1Ash2	0.558754	-0.839715	down
SLC16A5	9121	NY15	HNF1Ash1	0.602125	-0.731866	down
SLC16A5	9121	NY15	HNF1Ash2	0.539516	-0.890262	down
SLC16A5	9121	NY8	HNF1Ash1	0.644777	-0.633129	down
SLC16A5	9121	NY8	HNF1Ash2	0.606891	-0.720491	down
SLC16A6	9120	NY15	HNF1Ash2	1.68021	0.748639	up
SLC22A3	6581	NY15	HNF1Ash1	0.465247	-1.10393	down
SLC22A3	6581	NY15	HNF1Ash2	0.492776	-1.021	down
SLC22A3	6581	NY8	HNF1Ash1	0.41989	-1.25192	down
SLC22A3	6581	NY8	HNF1Ash2	0.418479	-1.25677	down
SLC25A39	51629	NY8	HNF1Ash1	1.64476	0.717873	up
SLC35D2	11046	NY15	HNF1Ash2	0.588335	-0.765289	down
SLC35D2	11046	NY8	HNF1Ash2	0.627909	-0.671372	down
SLC35F3	148641	NY15	HNF1Ash1	0.574859	-0.79872	down
SLC35F3	148641	NY15	HNF1Ash2	0.532174	-0.910031	down
SLC35F3	148641	NY8	HNF1Ash2	0.546202	-0.872492	down
SLC37A1	54020	NY15	HNF1Ash1	0.458771	-1.12415	down
SLC37A1	54020	NY15	HNF1Ash2	0.406077	-1.30018	down
SLC37A1	54020	NY8	HNF1Ash1	0.601023	-0.734508	down
SLC37A1	54020	NY8	HNF1Ash2	0.453741	-1.14006	down
SLC37A2	219855	NY8	HNF1Ash1	0.650018	-0.621449	down
SLC37A2	219855	NY8	HNF1Ash2	0.605331	-0.724203	down
SLC41A2	84102	NY15	HNF1Ash1	0.629185	-0.668444	down
SLC41A2	84102	NY15	HNF1Ash2	0.597426	-0.743169	down
SLC5A6	8884	NY15	HNF1Ash2	1.81251	0.857987	up
SLCO1B1	10599	NY15	HNF1Ash1	0.5221	-0.937602	down
SLCO1B1	10599	NY15	HNF1Ash2	0.421139	-1.24763	down
SLCO1B1	10599	NY8	HNF1Ash2	0.511381	-0.96753	down
SLCO1B3	28234	NY15	HNF1Ash1	0.478895	-1.06222	down
SLCO1B3	28234	NY15	HNF1Ash2	0.445832	-1.16543	down
SLCO1B3	28234	NY8	HNF1Ash1	0.582604	-0.779413	down
SLCO1B3	28234	NY8	HNF1Ash2	0.457934	-1.12679	down
SLCO1B7	338821	NY15	HNF1Ash1	0.523504	-0.933728	down
SLCO1B7	338821	NY15	HNF1Ash2	0.441226	-1.18041	down
SLCO1B7	338821	NY8	HNF1Ash2	0.507708	-0.977928	down
SLFN13	146857	NY8	HNF1Ash2	0.62318	-0.682279	down	yes
SLMAP	7871	NY15	HNF1Ash2	0.62592	-0.67595	down
SMAGP	57228	NY15	HNF1Ash1	0.638351	-0.647578	down
SMAGP	57228	NY15	HNF1Ash2	0.600692	-0.735302	down
SNAI1	6615	NY15	HNF1Ash1	2.0166	1.01193	up
SNAI1	6615	NY15	HNF1Ash2	1.98712	0.990682	up
SNAI1	6615	NY8	HNF1Ash1	1.74044	0.799454	up
SNAI1	6615	NY8	HNF1Ash2	1.63136	0.706079	up
SNORD62	NA	NY8	HNF1Ash1	1.67184	0.741439	neither
SNORD62	NA	NY8	HNF1Ash2	0.640006	-0.643844	neither
SNRK	54861	NY15	HNF1Ash1	0.629656	-0.667365	down
SNRK	54861	NY15	HNF1Ash2	0.626777	-0.673977	down
SORT1	6272	NY15	HNF1Ash2	0.641929	-0.639514	down
SOX12	6666	NY8	HNF1Ash1	1.65242	0.724583	up
SOX21	11166	NY8	HNF1Ash1	1.52943	0.612997	up
SPARC	6678	NY15	HNF1Ash1	2.7513	1.46012	up
SPARC	6678	NY15	HNF1Ash2	3.10907	1.63648	up
SPARC	6678	NY8	HNF1Ash1	1.61778	0.694015	up
SPARC	6678	NY8	HNF1Ash2	1.70487	0.769662	up
SPCS1	28972	NY15	HNF1Ash2	1.5874	0.666667	up
SPECC1	92521	NY15	HNF1Ash1	1.57492	0.655279	up
SPECC1	92521	NY15	HNF1Ash2	1.61614	0.692555	up
SPECC1	92521	NY8	HNF1Ash2	1.52065	0.604686	up
SPINT1	6692	NY15	HNF1Ash1	0.520147	-0.94301	down
SPINT1	6692	NY15	HNF1Ash2	0.382223	-1.38752	down
SPINT1	6692	NY8	HNF1Ash2	0.457157	-1.12924	down
SPINT2	10653	NY15	HNF1Ash1	0.600666	-0.735364	down
SPINT2	10653	NY15	HNF1Ash2	0.530971	-0.913295	down
SPINT2	10653	NY8	HNF1Ash2	0.619884	-0.68993	down
SPTLC2	9517	NY15	HNF1Ash2	0.60362	-0.728287	down
SQRDL	58472	NY15	HNF1Ash1	0.471847	-1.08361	down
SQRDL	58472	NY15	HNF1Ash2	0.421393	-1.24676	down
SQRDL	58472	NY8	HNF1Ash2	0.53324	-0.907144	down
SRPRB	58477	NY15	HNF1Ash1	1.59203	0.670864	up
SRPRB	58477	NY15	HNF1Ash2	1.60539	0.682928	up
SRPX2	27286	NY8	HNF1Ash1	0.576396	-0.794869	down
SRPX2	27286	NY8	HNF1Ash2	0.503161	-0.990908	down
ST6GALNAC6	30815	NY15	HNF1Ash1	1.7191	0.781655	up
ST6GALNAC6	30815	NY15	HNF1Ash2	1.58882	0.66796	up
ST7-OT3	93655	NY8	HNF1Ash1	1.58954	0.668608	up
STARD7	56910	NY15	HNF1Ash2	1.53544	0.618649	up
STC1	6781	NY15	HNF1Ash1	2.02316	1.01661	up
STC1	6781	NY15	HNF1Ash2	1.93488	0.952248	up
STC1	6781	NY8	HNF1Ash1	1.50388	0.588691	up
STC1	6781	NY8	HNF1Ash2	1.67173	0.741345	up
STEAP1	26872	NY15	HNF1Ash1	0.530551	-0.914438	down
STEAP1	26872	NY15	HNF1Ash2	0.663272	-0.592327	down
STEAP1	26872	NY8	HNF1Ash2	0.649547	-0.622495	down
STEAP2	261729	NY15	HNF1Ash1	0.375778	-1.41205	down
STEAP2	261729	NY15	HNF1Ash2	0.378879	-1.40019	down
STEAP2	261729	NY8	HNF1Ash1	0.592428	-0.755289	down
STEAP2	261729	NY8	HNF1Ash2	0.439923	-1.18468	down
STEAP3	55240	NY15	HNF1Ash1	1.50318	0.588015	up
STEAP3	55240	NY15	HNF1Ash2	1.60731	0.684649	up
STIL	6491	NY15	HNF1Ash2	0.654021	-0.612591	down
STK39	27347	NY15	HNF1Ash2	0.654688	-0.61112	down
STOM	2040	NY15	HNF1Ash2	0.625052	-0.677951	down
STON1	11037	NY15	HNF1Ash1	1.81158	0.857247	up
STON1	11037	NY15	HNF1Ash2	1.95189	0.96487	up
STX7	8417	NY15	HNF1Ash2	0.645163	-0.632264	down
SULF2	55959	NY8	HNF1Ash2	0.64317	-0.636729	down
SYDE2	84144	NY15	HNF1Ash1	1.50604	0.590762	up
SYDE2	84144	NY15	HNF1Ash2	1.63351	0.707973	up
SYDE2	84144	NY8	HNF1Ash2	1.71218	0.775831	up
SYNM	23336	NY15	HNF1Ash1	1.92933	0.948102	up
SYNM	23336	NY15	HNF1Ash2	1.86162	0.896558	up
SYNM	23336	NY8	HNF1Ash1	1.51023	0.59477	up
SYNM	23336	NY8	HNF1Ash2	1.58745	0.666713	up
TACSTD2	4070	NY15	HNF1Ash1	0.444784	-1.16882	down
TACSTD2	4070	NY15	HNF1Ash2	0.52265	-0.936082	down
TACSTD2	4070	NY8	HNF1Ash2	0.526769	-0.924757	down
TANK	10010	NY15	HNF1Ash2	0.655355	-0.609652	down
TAS2R43	259289	NY8	HNF1Ash2	0.630996	-0.664298	down
TBC1D12	23232	NY15	HNF1Ash2	0.66339	-0.592071	down
TBC1D2	55357	NY15	HNF1Ash1	1.67627	0.745251	up
TBC1D4	9882	NY15	HNF1Ash1	1.98959	0.992474	up
TBC1D4	9882	NY15	HNF1Ash2	1.9443	0.959252	up
TBC1D4	9882	NY8	HNF1Ash1	1.512	0.596461	up
TBC1D4	9882	NY8	HNF1Ash2	1.95107	0.964269	up
TBX15	6913	NY8	HNF1Ash2	0.647474	-0.627105	down
TC2N	123036	NY15	HNF1Ash1	0.624102	-0.680147	down
TC2N	123036	NY15	HNF1Ash2	0.529814	-0.916441	down
TC2N	123036	NY8	HNF1Ash2	0.526544	-0.925375	down
TCF7L2	6934	NY15	HNF1Ash2	0.621274	-0.686697	down
TCP11L2	255394	NY8	HNF1Ash2	0.580274	-0.785193	down
TEP1	7011	NY8	HNF1Ash2	0.664434	-0.589801	down
TES	26136	NY15	HNF1Ash1	0.655455	-0.609432	down
TES	26136	NY15	HNF1Ash2	0.623645	-0.681204	down
TES	26136	NY8	HNF1Ash1	0.650316	-0.620788	down
TES	26136	NY8	HNF1Ash2	0.618402	-0.693383	down
TESC	54997	NY15	HNF1Ash1	0.338267	-1.56376	down	yes
TESC	54997	NY15	HNF1Ash2	0.300562	-1.73426	down	yes
TESC	54997	NY8	HNF1Ash1	0.153192	-2.70659	down	yes
TESC	54997	NY8	HNF1Ash2	0.0813153	-3.62033	down	yes
TFF2	7032	NY8	HNF1Ash1	0.628328	-0.670411	down
TGFB1I1	7041	NY8	HNF1Ash1	1.68153	0.749778	up
THBS1	7057	NY15	HNF1Ash1	1.98158	0.98665	up
THBS1	7057	NY15	HNF1Ash2	2.2967	1.19957	up
THBS1	7057	NY8	HNF1Ash2	1.67008	0.739916	up
TIMP1	7076	NY8	HNF1Ash2	1.55284	0.634907	up
TINAGL1	64129	NY15	HNF1Ash1	0.629233	-0.668335	down
TINAGL1	64129	NY15	HNF1Ash2	0.525915	-0.9271	down
TINAGL1	64129	NY8	HNF1Ash2	0.560476	-0.835274	down
TJP2	9414	NY15	HNF1Ash1	0.605208	-0.724498	down
TJP2	9414	NY15	HNF1Ash2	0.562551	-0.829945	down
TLE4	7091	NY8	HNF1Ash2	1.75065	0.807893	up
TM4SF4	7104	NY15	HNF1Ash1	0.187217	-2.41721	down
TM4SF4	7104	NY15	HNF1Ash2	0.16479	-2.6013	down
TM4SF4	7104	NY8	HNF1Ash1	0.110158	-3.18235	down
TM4SF4	7104	NY8	HNF1Ash2	0.056983	-4.13332	down
TMC7	79905	NY15	HNF1Ash1	0.567002	-0.818574	down
TMC7	79905	NY15	HNF1Ash2	0.484699	-1.04484	down
TMC7	79905	NY8	HNF1Ash1	0.613151	-0.705686	down
TMC7	79905	NY8	HNF1Ash2	0.547027	-0.870315	down
TMCC3	57458	NY15	HNF1Ash1	0.642606	-0.637995	down
TMCC3	57458	NY15	HNF1Ash2	0.616138	-0.698675	down
TMEM133	83935	NY8	HNF1Ash1	0.601262	-0.733934	down
TMEM139	135932	NY8	HNF1Ash2	0.662705	-0.593562	down
TMEM144	55314	NY15	HNF1Ash2	0.592465	-0.755199	down
TMEM144	55314	NY8	HNF1Ash2	0.616229	-0.698461	down
TMEM2	23670	NY8	HNF1Ash2	0.644036	-0.634786	down
TMEM208	29100	NY8	HNF1Ash2	1.53262	0.616004	up
TMEM223	79064	NY8	HNF1Ash1	1.60803	0.68529	up
TMEM62	80021	NY15	HNF1Ash1	0.653504	-0.613733	down
TMEM62	80021	NY15	HNF1Ash2	0.630782	-0.664787	down
TMEM81	388730	NY8	HNF1Ash1	1.79921	0.847367	neither
TMEM86B	255043	NY8	HNF1Ash1	2.15002	1.10435	up
TMEM86B	255043	NY8	HNF1Ash2	1.50701	0.591686	up
TMEM97	27346	NY8	HNF1Ash2	2.16668	1.11549	up
TMTC2	160335	NY15	HNF1Ash1	0.593846	-0.751839	down
TMTC2	160335	NY15	HNF1Ash2	0.581709	-0.78163	down
TMTC2	160335	NY8	HNF1Ash1	0.645469	-0.63158	down
TMTC2	160335	NY8	HNF1Ash2	0.580015	-0.785838	down
TNFRSF10A	8797	NY15	HNF1Ash2	0.651214	-0.618797	down
TNFRSF10B	8795	NY15	HNF1Ash2	0.616916	-0.696854	down
TNFRSF11B	4982	NY8	HNF1Ash1	0.633875	-0.65773	down
TNFRSF11B	4982	NY8	HNF1Ash2	0.638158	-0.648014	down
TNFSF10	8743	NY15	HNF1Ash1	1.5128	0.597218	up
TNFSF10	8743	NY8	HNF1Ash2	1.50616	0.59087	up
TNIP1	10318	NY15	HNF1Ash2	0.645834	-0.630765	down
TNS4	84951	NY15	HNF1Ash1	0.525723	-0.927625	down
TNS4	84951	NY15	HNF1Ash2	0.518979	-0.946251	down
TOX3	27324	NY15	HNF1Ash1	0.19826	-2.33453	down
TOX3	27324	NY15	HNF1Ash2	0.177029	-2.49794	down
TOX3	27324	NY8	HNF1Ash1	0.300555	-1.7343	down
TOX3	27324	NY8	HNF1Ash2	0.165378	-2.59616	down
TP53I11	9537	NY15	HNF1Ash1	0.569249	-0.812868	down
TP53I11	9537	NY15	HNF1Ash2	0.551388	-0.858859	down
TPD52L1	7164	NY8	HNF1Ash2	0.636384	-0.652031	down
TPM1	7168	NY8	HNF1Ash2	0.624457	-0.679326	down
TRAM2	9697	NY15	HNF1Ash1	1.50135	0.586257	up
TRAM2	9697	NY15	HNF1Ash2	1.5213	0.605309	up
TRIB3	57761	NY15	HNF1Ash2	0.654393	-0.611771	down
TRIB3	57761	NY8	HNF1Ash2	0.572755	-0.80401	down
TRIM2	23321	NY8	HNF1Ash2	0.597196	-0.743724	down
TRIM25	7706	NY15	HNF1Ash1	0.616472	-0.697892	down
TRIM25	7706	NY15	HNF1Ash2	0.662356	-0.594321	down
TRIM31	11074	NY15	HNF1Ash1	0.341333	-1.55075	down
TRIM31	11074	NY15	HNF1Ash2	0.176465	-2.50254	down
TRIM31	11074	NY8	HNF1Ash1	0.373881	-1.41935	down
TRIM31	11074	NY8	HNF1Ash2	0.151505	-2.72256	down
TRNP1	388610	NY15	HNF1Ash1	0.537825	-0.894791	down
TRNP1	388610	NY15	HNF1Ash2	0.577597	-0.791865	down
TRNP1	388610	NY8	HNF1Ash1	0.372255	-1.42564	down
TRNP1	388610	NY8	HNF1Ash2	0.327892	-1.60871	down
TSC22D1	8848	NY15	HNF1Ash1	1.54334	0.626052	up
TSC22D1	8848	NY15	HNF1Ash2	1.50756	0.592214	up
TSPAN3	10099	NY15	HNF1Ash1	0.559642	-0.837424	down
TSPAN3	10099	NY15	HNF1Ash2	0.581776	-0.781464	down
TSPAN3	10099	NY8	HNF1Ash1	0.632223	-0.661494	down
TSPAN3	10099	NY8	HNF1Ash2	0.655439	-0.609468	down
TSPAN8	7103	NY15	HNF1Ash1	0.602566	-0.73081	down
TSPAN8	7103	NY15	HNF1Ash2	0.557881	-0.84197	down
TTC36	143941	NY8	HNF1Ash1	1.91591	0.938031	up
TTLL7	79739	NY15	HNF1Ash1	1.6943	0.760686	up
TTLL7	79739	NY15	HNF1Ash2	1.81945	0.863505	up
TTLL7	79739	NY8	HNF1Ash2	1.69416	0.760571	up
TUBB3	10381	NY8	HNF1Ash1	1.64613	0.719076	up
TUBB3	10381	NY8	HNF1Ash2	1.7175	0.780311	up
TUBG2	27175	NY8	HNF1Ash1	1.56448	0.645686	up
TUBG2	27175	NY8	HNF1Ash2	1.50483	0.589597	up
TUFT1	7286	NY15	HNF1Ash1	0.642627	-0.637947	down
TUFT1	7286	NY15	HNF1Ash2	0.630851	-0.664628	down
TXNIP	10628	NY15	HNF1Ash2	0.646042	-0.630301	down
UCA1	652995	NY15	HNF1Ash1	0.385727	-1.37435	down
UCA1	652995	NY15	HNF1Ash2	0.262371	-1.93032	down
UCA1	652995	NY8	HNF1Ash1	0.612685	-0.706783	down
UCA1	652995	NY8	HNF1Ash2	0.349312	-1.51741	down
UGT1A7	54577	NY8	HNF1Ash2	1.51825	0.602409	up
UGT1A8	54576	NY8	HNF1Ash1	0.598192	-0.741318	down
UNC13D	201294	NY15	HNF1Ash1	0.652467	-0.616022	down
UNC13D	201294	NY15	HNF1Ash2	0.63455	-0.656195	down
UPK1B	7348	NY15	HNF1Ash1	0.304394	-1.71599	down
UPK1B	7348	NY15	HNF1Ash2	0.322238	-1.6338	down
UPK1B	7348	NY8	HNF1Ash1	0.310959	-1.6852	down
UPK1B	7348	NY8	HNF1Ash2	0.222956	-2.16517	down
UPP1	7378	NY15	HNF1Ash2	0.59276	-0.754481	down
UROS	7390	NY15	HNF1Ash2	1.55571	0.637577	up
USP5	8078	NY15	HNF1Ash2	1.66902	0.739	up
VKORC1	79001	NY8	HNF1Ash1	1.66451	0.7351	up
VNN1	8876	NY15	HNF1Ash1	0.371426	-1.42885	down
VNN1	8876	NY15	HNF1Ash2	0.301216	-1.73113	down
VNN1	8876	NY8	HNF1Ash1	0.441463	-1.17964	down
VNN1	8876	NY8	HNF1Ash2	0.370202	-1.43362	down
VPS37B	79720	NY15	HNF1Ash1	0.657784	-0.604313	down
VPS37B	79720	NY15	HNF1Ash2	0.617498	-0.695494	down
VPS37B	79720	NY8	HNF1Ash2	0.604973	-0.725056	down
VSIG1	340547	NY15	HNF1Ash1	0.286309	-1.80436	down
VSIG1	340547	NY15	HNF1Ash2	0.262166	-1.93145	down
VSIG1	340547	NY8	HNF1Ash1	0.377523	-1.40536	down
VSIG1	340547	NY8	HNF1Ash2	0.342152	-1.54729	down
VWA1	64856	NY8	HNF1Ash1	1.78528	0.836152	up
VWA1	64856	NY8	HNF1Ash2	1.58865	0.667804	up
WBP1	23559	NY8	HNF1Ash2	1.53003	0.613564	up
WISP3	8838	NY8	HNF1Ash2	0.664286	-0.590123	down
WLS	79971	NY15	HNF1Ash1	0.657857	-0.604155	down
WWC1	23286	NY15	HNF1Ash1	0.406224	-1.29965	down
WWC1	23286	NY15	HNF1Ash2	0.344174	-1.53879	down
WWC1	23286	NY8	HNF1Ash1	0.586511	-0.76977	down
WWC1	23286	NY8	HNF1Ash2	0.370732	-1.43155	down
XRCC4	7518	NY15	HNF1Ash2	0.661748	-0.595646	down
YOD1	55432	NY8	HNF1Ash2	0.582673	-0.779241	down
ZC3H12A	80149	NY15	HNF1Ash2	0.537834	-0.894768	down
ZCCHC24	219654	NY15	HNF1Ash1	1.66779	0.737935	up
ZCCHC24	219654	NY15	HNF1Ash2	1.58727	0.666546	up
ZEB2	9839	NY15	HNF1Ash2	1.60877	0.685958	up
ZEB2	9839	NY8	HNF1Ash2	1.85251	0.889479	up
ZFP36	7538	NY8	HNF1Ash2	0.56452	-0.824903	down
ZHX2	22882	NY15	HNF1Ash1	0.576068	-0.795689	down
ZHX2	22882	NY15	HNF1Ash2	0.527227	-0.923504	down
ZHX2	22882	NY8	HNF1Ash2	0.552772	-0.855244	down
ZIC2	7546	NY8	HNF1Ash2	1.62719	0.702379	up
ZNF	NA	NY8	HNF1Ash2	0.392491	-1.34927	neither
ZNF165	7718	NY15	HNF1Ash1	0.526355	-0.925892	down
ZNF165	7718	NY15	HNF1Ash2	0.489449	-1.03077	down
ZNF165	7718	NY8	HNF1Ash1	0.65468	-0.611137	down
ZNF165	7718	NY8	HNF1Ash2	0.409851	-1.28683	down
ZNF174	7727	NY8	HNF1Ash1	1.55948	0.641061	up
ZNF174	7727	NY8	HNF1Ash2	1.52994	0.613474	up
ZNF323	64288	NY15	HNF1Ash1	1.5241	0.607961	up
ZNF323	64288	NY15	HNF1Ash2	1.98001	0.985508	up
ZNF323	64288	NY8	HNF1Ash2	1.7406	0.799581	up
ZNF438	220929	NY15	HNF1Ash1	0.493347	-1.01932	down	yes
ZNF438	220929	NY15	HNF1Ash2	0.50333	-0.990423	down	yes
ZNF438	220929	NY8	HNF1Ash1	0.5303	-0.915119	down	yes
ZNF438	220929	NY8	HNF1Ash2	0.573402	-0.802381	down	yes
ZNF488	118738	NY8	HNF1Ash1	1.54907	0.631402	up
ZNF488	118738	NY8	HNF1Ash2	1.60542	0.682954	up
ZNF581	51545	NY8	HNF1Ash1	0.615915	-0.699196	down
ZNF625-ZNF20	100529855	NY8	HNF1Ash1	0.573383	-0.802429	down
ZNF625-ZNF20	100529855	NY8	HNF1Ash2	0.563447	-0.827648	down
ZNF860	344787	NY8	HNF1Ash1	0.585545	-0.772148	down
ZNF860	344787	NY8	HNF1Ash2	0.491996	-1.02328	down

## Sheet: NY8_and_NY15_HNF1A_binding
HNF1A binding status for genes differentially expressed in NY8 and NY15 cells - related to Figure 7B
				distance from gene TSS to nearest ChIP peak (bp)
gene	entrez	HNF1A_regulation	HNF1A_binding	NY15_HNF1A_ChIP_1	NY15_HNF1A_ChIP_2	NY8_HNF1A_ChIP_1	NY8_HNF1A_ChIP_2	is_CSC50_gene	enhancer_at_peak	NY15_1_enhancer_ct	NY15_2_enhancer_ct	NY8_1_enhancer_ct	NY8_2_enhancer_ct
EPS8L3	79574	down	none	-170499	-169733	-171442	-170695			2	2	0	1
CSF1	1435	up	distal	23910	23144	24853	24106		yes	2	2	0	1
DENND2D	79961	down	none	723004	-391728	-44990	-68429			1	1	0	0
CTTNBP2NL	55917	down	proximal	786	273	-255081	444		yes	1	1	0	1
BCL2L15	440603	down	proximal	0	0	-260	0			0	0	0	0
FMO5	2330	down	none	-11813	-11268	114262	-11545			1	2	0	2
MTMR11	10903	down	proximal	0	0	669043	0		yes	1	2	0	1
LOC100505633	NA	down	none	-20926	-20577	-212382	-35162			0	1	1	2
F11R	50848	down	none	155078	155122	384267	155107			0	0	0	0
RGS4	5999	up	none	-194014	103883	356030	-211938		yes	1	1	0	1
KIAA0040	9674	down	distal	22639	23104	61265	23118		yes	1	1	0	1
ARHGEF10L	55160	down	distal	19593	19450	40346	19828		yes	2	2	0	2
LAMC2	3918	down	distal	44573	44031	45582	44470		yes	1	2	0	1
NR5A2	2494	down	proximal	0	0	0	0	yes		0	0	0	0
C1orf106	55765	down	proximal	2731	0	4518	0		yes	4	1	2	1
ELF3	1999	down	proximal	0	0	7906	0		yes	2	2	0	2
PLEKHA6	22874	down	none	92358	-3359	93138	-57185			0	2	0	1
CTSE	1510	down	distal	-88690	-88384	-89008	-88306		yes	2	2	2	2
C1orf116	79098	down	proximal	566	0	39608	2932		yes	3	4	0	2
PFKFB2	5208	down	none	-21085	-1617	-60127	-23451			3	1	0	2
C4BPB	725	down	none	-56677	-37209	-95719	-59043			3	1	0	2
CD55	1604	down	proximal	0	0	-328324	0		yes	1	1	0	1
LAMB3	3914	down	proximal	-360	0	-49097	-114		yes	1	1	0	2
HSPG2	3339	down	distal	14671	14623	15588	14666	yes	yes	1	1	1	1
CAPN8	388743	down	none	835389	-35123	835880	-54913			0	1	0	0
EPHX1	2052	up	none	-62796	-62629	2975709	-62654			1	1	1	1
KCNK1	3775	down	distal	58527	58653	-254271	58530		yes	1	1	0	1
SLC35F3	148641	down	none	142008	-230246	-545200	-230285			0	1	0	1
NR0B2	8431	down	proximal	0	0	-56854	0	yes	yes	1	1	0	1
TRNP1	388610	down	proximal	999	-43	-1885	-136		yes	1	1	1	1
TINAGL1	64129	down	none	-2078	-123740	-124153	-85275			1	1	1	2
TACSTD2	4070	down	none	-81812	-81389	134247	-82068			0	0	0	0
INADL	10207	down	none	-608909	-608704	-173817	854265			1	1	0	0
CRYZ	1429	down	none	1237	0	1593	0			0	0	0	0
TTLL7	79739	up	distal	96957	96724	-1326708	96759			0	0	1	0
SYDE2	84144	up	distal	62548	62490	-124813	62483		yes	1	1	1	1
BCL10	8915	down	distal	-48366	-47396	-48954	-47735		yes	4	3	1	3
PKN2	5586	down	distal	89772	89228	-756560	89454		yes	1	1	0	1
LOC100505839	NA	down	none	143251	46734	362975	-167179			1	0	1	2
OBFC1	79991	down	none	27501	27239	-191467	-108191			1	1	1	0
COL17A1	1308	down	proximal	-23359	0	-23874	0	yes		1	0	1	0
SFR1	119392	down	proximal	-3273	-192	-11583	-201		yes	1	1	1	1
DUSP5	1847	down	distal	24199	24179	24691	2767			0	0	0	1
ADRB1	153	down	distal	37378	37093	37888	-16737			0	0	0	1
C10orf47	254427	down	distal	-28168	-28031	162799	-28687		yes	2	2	1	1
PLEKHA1	59338	down	distal	-42174	-41926	-42611	-42150		yes	1	1	0	1
ZNF438	220929	down	distal	-19456	-19251	27083	0	yes	yes	1	1	1	1
ALOX5	240	down	none	-433708	2253	-434150	-432480			1	1	0	1
AKR1C1	1645	up	distal	-22967	-22897	-23301	-22751		yes	1	1	1	1
AKR1C2	1646	up	none	-52917	-53036	-53755	-53114			1	1	1	1
HKDC1	80201	down	proximal	0	0	2747757	0		yes	2	2	1	2
MCU	90550	down	none	-52404	-52078	-593329	-52300			3	3	1	3
ANKRD22	118932	down	distal	11034	10228	464618	10928			0	0	2	0
ARHGAP42	143872	down	distal	88273	37	88492	-2214		yes	1	1	1	0
KIAA1377	57562	down	distal	-44145	-34343	-47788	-43921		yes	1	0	1	1
FAM55B	120406	down	none	-1073648	-114814	145755	-114813		yes	0	1	0	1
CLMP	79827	down	distal	-17613	-16438	-22624	-17549			0	0	0	0
CDON	50937	up	none	117103	116842	262879	116843			1	1	0	1
INSC	387755	down	distal	82828	-5393	295833	82298			0	0	0	0
IFITM10	402778	up	none	-79539	-79432	-80166	-79532			1	1	1	1
CTSD	1509	up	distal	-66141	-66034	-66768	-66134		yes	1	1	1	1
EHF	26298	down	distal	-17114	2596	19273	-16732		yes	1	1	1	1
CHKA	1119	down	distal	-25513	-25454	-2817837	30263		yes	1	2	0	1
P2RY2	5029	down	none	-169860	-169179	-2222461	-169675			2	2	0	1
FUT4	2526	down	none	1467869	-6697	-177129	0			2	0	0	2
PIWIL4	143689	down	none	1444412	-30154	-200586	-22925			2	0	0	2
OAS1	4938	down	proximal	0	0	17900	0		yes	1	1	3	1
TESC	54997	down	distal	6566	0	7695	0	yes	yes	1	1	0	1
RHOF	54509	down	proximal	1100	664	416210	1046		yes	1	2	1	1
BCL2L14	79370	down	none	-187849	-187777	801051	-188148		yes	1	1	1	1
VPS37B	79720	down	none	57421	3565	72460	57398			1	1	0	1
MANSC1	54682	down	proximal	0	-408004	-521760	0		yes	2	2	1	2
GPRC5A	9052	down	none	0	-5465	-18419	-6500			3	3	1	3
C12orf36	283422	down	distal	0	-8742	504142	-12893			0	0	1	0
MGP	4256	up	none	262666	262072	264807	517071			3	3	2	1
SLCO1B3	28234	down	none	-309691	630497	404344	630920			1	0	0	0
SLCO1B7	338821	down	none	425501	425505	199352	425928			0	0	0	0
SLCO1B1	10599	down	none	310003	310007	83854	310430			0	0	0	0
ITPR2	3709	up	distal	61557	61533	62527	61543		yes	2	2	1	2
FGD4	121512	down	distal	-21783	-21730	-100788	-53586	yes		0	0	2	1
LIMA1	51474	down	distal	11280	11098	3809600	11287		yes	1	1	1	1
DGKA	1606	down	none	70089	69899	70300	42255			1	1	1	0
ERBB3	2065	down	none	-77612	-77303	-78005	-77177			1	1	1	1
CPM	1368	down	distal	-60835	-60256	-105058	-60787		yes	2	2	0	2
LOC283392	NA	down	none	-404	-452	-237926	1107			1	1	0	2
TMTC2	160335	down	none	-162120	-161795	582143	-161822			0	0	0	0
FGD6	55785	down	proximal	0	0	47580	0		yes	0	3	1	0
IRS2	8660	down	distal	192567	43234	1396083	42311		yes	1	1	0	1
KLF5	688	down	distal	-17445	-17280	-17788	-2390		yes	2	2	1	1
TBC1D4	9882	up	none	-223092	-222705	-278394	-222865			1	1	1	1
LMO7	4008	down	distal	84772	84385	140074	84545		yes	1	1	1	1
PPP1R13B	23368	down	distal	21556	20889	-32290	21435			0	0	1	0
MIA2	117153	down	proximal	0	0	0	0			0	0	0	0
SAV1	60485	down	none	271264	225702	302920	-8847			1	1	0	1
PYGL	5836	up	none	547489	501927	579145	266265			1	1	0	1
LGALS3	3958	down	proximal	-1014	-750	204016	-837		yes	1	1	2	1
PELI2	57161	down	none	-189287	52137	-285685	-188874			0	0	1	0
C14orf105	55195	down	proximal	0	0	0	0	yes		0	0	0	0
GPX2	2877	down	proximal	3057	0	-956451	0		yes	1	1	0	1
FUT8	2530	down	none	-107837	-106066	488672	-106636			0	1	0	0
FOS	2353	down	none	-38966	-487	801657	-652622			0	2	0	0
GALC	2581	down	none	-49922	2338	110110	-29800			1	2	0	1
TC2N	123036	down	none	-852163	-757554	-449728	-1175651			0	0	0	1
LGMN	5641	down	none	28239	122893	372617	-294484			0	0	0	1
SERPINA3	12	down	distal	660909	-12172	-143518	-11256		yes	0	1	0	1
ALDH1A3	220	down	distal	-64807	-64684	-396126	-64742			0	0	0	0
LPCAT4	254531	down	none	-1124451	-1124392	-346461	-371861			0	0	0	0
THBS1	7057	up	none	-398524	166776	-686340	60354		yes	1	0	1	1
SPINT1	6692	down	none	203802	203224	-1949306	203652			0	0	1	0
FRMD5	84978	down	none	1061672	-831048	1067195	1066950			1	2	1	2
DUOX2	50506	down	none	-325040	86548	-527277	-220131			1	2	1	1
SQRDL	58472	down	distal	5347	5160	6380	5159		yes	1	1	1	1
MYO5C	55930	down	none	-1158846	178845	-556644	-1158468			1	1	0	2
GCNT3	9245	down	proximal	0	0	0	0		yes	2	2	1	2
TSPAN3	10099	down	none	-1683207	2835	-2339452	-1683207			0	1	0	0
FAM108C1	58489	down	distal	-95269	-94961	470463	-95164		yes	1	1	0	1
ANPEP	290	up	none	-42037	-42354	-309712	-42455			1	1	0	1
SEMA4B	10509	down	distal	-59738	-23430	-59918	-18671		yes	0	1	0	1
SYNM	23336	up	none	-256736	-256505	-257870	-256879			1	1	1	1
TMC7	79905	down	none	435674	445200	-853607	445284			1	1	0	1
TOX3	27324	down	distal	-8932	1596	-17256	-8884			0	0	1	0
HSD17B2	3294	down	proximal	0	0	-110	0			0	0	0	0
OSGIN1	29948	up	none	1469132	-1415815	-186678	-396713			2	0	0	0
SPECC1	92521	up	none	-255840	1278064	1324179	-255853			1	0	0	1
MMP28	79148	down	none	-1980140	-1979255	-235314	915027			1	1	0	0
ARHGAP27	201176	down	none	1501121	-7295	-3362646	1501107			1	1	1	1
LOC339166	NA	down	distal	53959	62897	-983457	62904		yes	1	1	1	1
MRC2	9902	up	none	647701	-438266	-4235548	590020			1	1	1	0
SLC16A5	9121	down	distal	-8609	-8664	557745	-7846		yes	1	1	1	1
GREB1L	80000	down	none	759438	421302	860838	759377			1	0	1	1
DSC2	1824	down	none	-104158	-103938	-299415	-104288		yes	1	1	1	1
DSG2	1829	down	distal	-95563	-95656	-96050	-95341		yes	1	1	1	1
SERPINB5	5268	down	none	204298	179806	-2196107	204317		yes	1	0	0	1
LOC100505817	NA	down	distal	15119	15156	15550	14740			0	0	0	0
UCA1	652995	down	none	368158	663923	664162	664043			0	1	1	1
B3GNT3	10331	down	none	340611	340804	-1301806	340697			0	1	1	0
LSR	51599	down	none	-127216	-126795	210740	209779			2	2	0	2
SPINT2	10653	down	none	-331719	-331369	-804323	-331470			1	1	0	1
LGALS4	3960	down	proximal	0	128611	-313382	0			0	1	2	0
CEACAM1	634	down	distal	29351	29115	30230	29504		yes	1	1	1	1
FUT2	2524	down	none	266286	266287	2494303	267313			1	1	0	1
PTPRH	5794	down	none	1005785	-316713	406815	-677893			1	2	0	0
ZEB2	9839	up	none	301417	-75460	-1279706	-1172452			1	1	1	1
GALNT5	11227	down	distal	-74143	3091	202542	-74168		yes	1	1	1	1
CYTIP	9595	up	distal	-15671	9970	-16278	10275		yes	1	0	1	0
PLA2R1	22925	down	distal	-11769	-10488	-13591	-10311		yes	1	1	0	1
ITGB6	3694	down	distal	-7729	-7543	-28555	-21221		yes	1	1	1	1
DPP4	1803	down	proximal	0	0	6571	0	yes	yes	5	6	0	6
DHRS9	10170	down	distal	-13425	-25795	-358640	-28930		yes	2	0	0	1
ITGA6	3655	down	distal	13062	11301	14575	11295		yes	1	1	1	1
OSBPL6	114880	up	none	282455	281674	389452	282256			0	0	0	0
PPP1R1C	151242	down	none	-174309	-26984	-204722	-90945			1	1	2	2
GPR1	2825	up	none	241644	-121073	242338	241451			2	0	0	2
ABCB6	10058	up	none	-29719	-25850	-30091	-29577			1	0	1	2
CCL20	6364	down	distal	-51173	3979	97722	4108		yes	1	1	0	1
FAM110C	642273	down	none	-4361055	-432949	-256994	-368466			0	1	0	0
EPCAM	4072	down	distal	-13991	396	-23372	-13674		yes	1	2	1	1
ANXA4	307	down	distal	13463	11222	14206	0		yes	1	1	1	1
LOC100506123	NA	down	none	537219	537227	-777046	537338			1	1	1	1
LOC100506123	NA	down	none	-394399	-394407	-805661	-394518			1	1	0	1
ANKRD36B	57730	down	none	-279020	-279028	-690282	-279139			1	1	0	1
FLRT3	23767	down	distal	-5577	0	-6429	-5155			0	2	0	0
EPB41L1	2036	down	distal	-25041	-25055	-29793	-26067		yes	1	1	0	1
TRIB3	57761	down	none	20929	20730	366897	20148			1	1	0	1
HNF4A	3172	down	proximal	0	0	-796704	0	yes		0	0	1	0
SNAI1	6615	up	none	182791	-290769	-291757	-207167			2	2	1	1
PARD6B	84612	down	distal	29705	-1757	29909	14620		yes	1	4	1	1
BCAS1	8537	down	proximal	1858	0	-36801	1834		yes	1	1	0	1
CYP24A1	1591	down	distal	39391	39787	65935	39783		yes	2	2	0	2
FERMT1	55612	down	proximal	0	0	-51375	0	yes	yes	2	2	0	2
CXADR	1525	down	distal	14297	-10887	29644	-10997		yes	1	1	1	1
BACH1	571	down	none	-115712	-115538	448309	-115831			1	1	0	1
IFNAR2	3455	down	distal	-25090	-3251	-25677	-3226		yes	2	0	1	0
C21orf88	114041	down	distal	-17091	-44315	-74044	-16990			0	0	0	0
B3GALT5	10317	down	none	-26572	0	29539	-15226			0	0	0	0
SLC37A1	54020	down	distal	-30590	-33719	234750	-24939		yes	1	1	1	1
HMOX1	3162	up	proximal	-1337	-1154	-192817	-3575			0	0	0	1
LOC152225	NA	down	distal	-13755	0	-14961	0		yes	1	2	0	1
MYH15	22989	down	distal	-25554	-24980	-1050389	-25037			0	0	0	0
UPK1B	7348	down	distal	7841	2206	37652	7997			0	1	1	0
MUC13	56667	down	none	32898	32697	435986	0			2	2	0	0
HEG1	57493	up	none	154105	153904	557193	120683			2	2	0	0
KBTBD12	166348	down	none	-101010	-100197	-155449	-100743			1	3	1	3
GATA2	2624	up	none	671138	670325	725577	75744			1	3	1	0
PLS1	5357	down	proximal	-25	0	68106	0		yes	1	2	1	2
TM4SF4	7104	down	proximal	0	0	-550	0		yes	1	1	1	1
GPR87	53836	down	distal	10627	10860	-941639	10962		yes	2	1	1	1
ARL14	80117	down	proximal	0	0	822895	0		yes	1	2	0	1
TNFSF10	8743	up	distal	-39294	-70808	-224967	-39043		yes	1	3	1	1
B3GNT5	84002	down	distal	-6734	1432	-7938	-6783			0	1	0	0
LIPH	200879	down	none	209385	-5860	-401049	209185			1	2	0	1
LEPREL1	55214	up	none	183746	183996	-742666	-222427			1	1	0	1
MST1R	4486	down	none	-696936	-696933	-888613	-696934			1	1	0	1
ESRG	790952	down	distal	1400970	35575	-588	-70215			1	0	1	0
FRMD4B	23150	down	none	173253	173081	481882	185077			1	1	0	1
CHMP2B	25978	down	distal	-19000	22	-20426	-19005		yes	1	0	1	1
AP1AR	55435	down	none	915635	-117908	-739010	-118030			1	1	0	1
HS3ST1	9957	down	distal	-76190	-75951	-689442	-76196		yes	1	1	0	1
LOC285419	NA	down	proximal	-1424	-506	-2390	-804		yes	1	1	0	1
SH3D19	152503	down	none	-596410	174757	-1257721	-596375			0	2	1	0
TMEM144	55314	down	distal	87770	87554	88394	87716		yes	3	3	1	3
FGFBP1	9982	down	none	260730	260677	-534656	260654			1	1	0	1
ANXA10	11199	down	proximal	0	0	348034	0	yes		0	0	1	0
KLF3	51274	down	distal	8989	8720	850943	8905		yes	1	1	1	1
RBM47	54502	down	distal	52371	52284	155588	52236		yes	1	1	1	1
LIMCH1	22998	up	none	-783292	-783205	-886509	-783157			1	1	1	1
NIPAL1	152519	down	distal	15481	15415	-412029	15598			0	0	0	0
RASSF6	166824	down	none	274470	16996	274774	274293			0	1	0	0
CXCL3	2921	down	distal	14299	13857	14858	14297			0	0	0	0
SHROOM3	57619	down	distal	-57295	-56872	912320	-57602		yes	1	1	0	1
ANXA3	306	down	none	-170670	-123784	-170988	-123757			0	0	0	0
ARHGAP24	83478	down	none	453559	438529	453959	453598		yes	1	0	1	1
C5orf30	90355	up	none	310370	310115	4216001	310440			0	0	1	0
PRELID2	153768	down	distal	-142821	-18919	-143918	-18991		yes	2	1	1	2
FAM105A	54491	up	none	-375871	-375952	-376592	185932			1	1	1	0
PPP2R2B	5521	up	none	43077	43133	-753881	-87505			0	0	0	1
SPARC	6678	up	none	-260985	-261559	83586	139564			0	0	0	0
NMUR2	56923	down	distal	15849	2417	-94590	-93500	yes		0	0	0	0
HAVCR1	26762	down	proximal	0	0	0	0		yes	1	1	1	1
WWC1	23286	down	distal	9796	9402	-82994	9599		yes	0	1	0	1
F2RL1	2150	down	none	-27594	19557	-820399	0		yes	1	2	0	1
RASA1	5921	down	none	-702584	-291950	2152740	-163692			0	0	0	1
LOC285758	285758	down	none	53424	52946	-1574413	53339			0	0	0	0
GJA1	2697	up	proximal	1216566	-4715	-277118	-4732		yes	0	1	0	1
EDN1	1906	down	distal	41459	1725	53073	33666		yes	1	2	2	1
VNN1	8876	down	proximal	955	0	-5784	-4742			0	0	0	0
IL20RA	53832	down	distal	18435	18502	-1182117	18130			0	0	1	0
PERP	64065	down	distal	18622	0	-119755	18840		yes	1	1	1	1
CITED2	10370	up	proximal	-159133	0	-162402	-325		yes	1	0	2	0
GPR126	57211	down	distal	-520	70526	73337	72496		yes	1	1	1	1
SAMD5	389432	down	proximal	573	627	50289	526	yes	yes	1	1	0	1
SLC22A3	6581	down	distal	42051	38061	43246	42648		yes	1	0	1	1
MBOAT1	154141	down	distal	9158	9230	9567	9106		yes	2	2	2	2
ZNF165	7718	down	none	-304519	-287667	-32740	-306080			1	0	0	2
ZNF323	64288	up	none	560189	-541162	288410	-541119			1	1	0	1
TRIM31	11074	down	none	267420	0	551923	-9570			0	2	0	0
DDR1	780	down	none	47745	22825	-1322917	22835			0	2	0	2
KCNK5	8645	down	distal	25119	21111	157662	-50650		yes	1	1	0	1
C6orf132	647024	down	none	-83548	-83550	1272725	-83593			2	2	0	2
GPR110	266977	down	none	58199	58283	-364983	-1847		yes	1	1	0	1
PAQR8	85315	down	distal	-9103	-8948	27609	26727		yes	1	1	1	1
LRRC1	55227	down	distal	59674	512281	-1405041	59130		yes	2	0	1	2
FAM135A	57579	down	distal	-13529	-13273	-14043	-13443		yes	2	3	1	3
DSP	1832	down	none	38698	38470	39723	38623			1	2	1	2
MYO6	4646	down	distal	-12679	-12510	-13142	-12642		yes	1	1	1	1
PIK3CG	5294	down	distal	-90242	-90136	1144862	-90190		yes	1	1	1	1
TES	26136	down	distal	7608	7399	561684	7098		yes	1	1	1	1
FAM3C	10447	down	proximal	0	0	-1519	0			0	0	0	0
AKR1B1	231	up	none	89436	84344	89782	89246			1	0	1	1
AGR2	10551	down	distal	-16488	977	-16970	1045	yes		0	0	0	0
AHR	196	down	distal	8281	7005	-91777	8088		yes	0	1	1	0
IL6	3569	up	none	87453	87287	982121	87298			0	0	0	0
CARD11	84433	down	none	470776	470338	471197	470688			1	1	1	1
EEPD1	80820	down	distal	-23562	-23422	136748	-23296		yes	3	3	1	3
IGFBP1	3484	down	proximal	0	0	-282601	0	yes	yes	1	2	0	1
CACNA2D1	781	up	none	-1233066	-1233273	1287623	-1103613			0	0	1	0
STEAP1	26872	down	distal	17797	17320	18692	17715			0	0	0	0
STEAP2	261729	down	distal	17404	17033	-37989	17443			0	0	0	0
BAIAP2L1	55971	down	none	266689	266502	574622	-231357			1	1	0	0
CYP3A5	1577	down	proximal	0	245	1821816	37		yes	2	2	0	2
SAMD12	401474	down	none	-215507	-214785	238056	-173501			2	2	1	1
MAL2	114569	down	proximal	-19	0	-28329	0		yes	1	4	1	2
ZHX2	22882	down	none	-205373	-205056	-969286	-211612			1	1	1	0
FAM84B	157638	down	proximal	615	0	-66118	0		yes	1	4	0	3
STC1	6781	up	none	-136465	-136612	1489200	-136428			0	0	0	0
KIF13B	23303	down	distal	-19506	-12815	32801	-19513			0	0	0	0
RBPMS	11030	down	none	-128905	-128738	-947268	-128940			1	1	0	1
SDR16C5	195814	down	none	-215429	-281715	-43946	-206013			0	0	0	0
SDCBP	6386	down	none	-247137	388	-371908	208674			0	0	0	0
JPH1	56704	down	none	1004562	973658	147716	-84437	yes		1	2	0	0
HNF4G	3174	down	none	11983	-111336	-132089	-128766			0	0	1	2
FABP4	2167	up	none	287164	-150151	288481	287065			2	1	1	2
CHMP4C	92421	down	none	-536379	-97415	174902	172690			2	1	0	0
CDH17	1015	down	distal	6452	-998	8128	6496	yes		0	1	0	0
ESRP1	54845	down	none	-198714	-202	-199119	172933			4	2	1	0
LCN2	3934	down	none	61967	-16620	-603726	-16497			0	0	1	0
PRSS3	5646	down	none	322491	322287	-858146	189679			1	1	0	1
C9orf68	55064	down	none	-10758	0	-11491	-10752			1	2	0	1
MAMDC2	256691	up	none	-1302757	426431	1463389	-522937			0	0	0	1
GDA	9615	down	proximal	4772	3942	13232	4618		yes	1	2	0	1
PCSK5	5125	down	distal	60190	60158	-239187	60202			0	0	0	0
RASEF	158158	down	none	-69555	-69566	355022	-118324			0	0	0	0
DAPK1	1612	down	proximal	3902	3742	72003	3824		yes	1	1	1	1
SLC35D2	11046	down	none	-35360	-34815	-36752	-34829			1	1	1	1
VSIG1	340547	down	none	-1263180	-1262980	1397847	-908506			0	0	0	1
G6PD	2539	up	none	4337060	4337106	1417521	4336653			2	2	0	2
SAT1	6303	down	none	-2107903	-1671902	1496506	-2107749			0	0	0	0
DLG3	1741	down	distal	80719	80724	-3523650	80722			0	0	0	0
DIAPH2	1730	down	none	-230797	-209589	475821	-230761			0	2	0	0
CD24	100133941	down	none	-1	-1	7742955	7742651	yes		0	0	0	0

## Sheet: selected_genes_survival_summary
Summary of selected genes in expression vs survival in TCGA PAAD tumors - related to Figures 7E, S9A, and S9B
genes selected at FDR < 0.1
								increased survival			reduced survival
geneSelection	analysisType	geneCount	genesSigUp	fractionGenesSigUp	genesSigDn	fractionGenesSigDn	permutations (N)	z-score	estimated p	signif at α=0.05	z-score	estimated p	signif at α=0.05
HNF1A-upregulated/bound	overallSurvival	137	0	0	11	0.080292	10000	-0.502271	1	no	9.25728	0.0001	yes
HNF1A-upregulated	overallSurvival	237	0	0	13	0.0548523	10000	-0.492318	1	no	9.99266	0.0001	yes
HNF1A-downregulated	overallSurvival	45	0	0	2	0	10000	-0.424135	1	no	-0.512963	1	no
genes selected at FDR < 0.25
								increased survival			reduced survival
geneSelection	analysisType	geneCount	genesSigUp	fractionGenesSigUp	genesSigDn	fractionGenesSigDn	permutations (N)	z-score	estimated p	signif at α=0.05	z-score	estimated p	signif at α=0.05
HNF1A-upregulated/bound	overallSurvival	137	1	0	37	0.270073	10000	-0.870676	1	no	9.89922	0.0001	yes
HNF1A-upregulated	overallSurvival	237	2	0.00421941	57	0.236287	10000	-0.581885	0.7044	no	11.6875	0.0001	yes
HNF1A-downregulated	overallSurvival	45	0	0	1	0.0222222	10000	-0.72193	1	no	-0.345859	0.6063	no
estimated error of p (α=0.05)		0.0043589
estimated % error		8.7178
p-value error estimated using:

## Sheet: HNF1A_activated_bound_survival
HNF1A-upregulated and -bound genes: association between gene expression and survival in TCGA PAAD tumors - related to Figure 7E
gene	entrez	survival_direction	p-value	fdr	log10_fdr_signed
PPP1R13B	23368	up	0.102604	0.305582	0.514873
PAQR8	85315	up	0.0983409	0.305582	0.514873
SAMD5	389432	up	0.104891	0.305746	0.514639
LOC285419	NA	up	0.219782	0.507045	0.294954
ADRB1	153	up	0.247328	0.53784	0.269347
SLC37A1	54020	up	0.319393	0.61321	0.212391
AGR2	10551	up	0.412725	0.693124	0.159189
ESRG	790952	up	0.406501	0.693124	0.159189
NR0B2	8431	up	0.411144	0.693124	0.159189
GPX2	2877	up	0.499172	0.746754	0.126823
LGALS4	3960	up	0.488769	0.746754	0.126823
CXCL3	2921	up	0.559086	0.797862	0.0980723
TOX3	27324	up	0.627933	0.843054	0.0741447
INSC	387755	up	0.633829	0.843054	0.0741447
PIK3CG	5294	up	0.623925	0.843054	0.0741447
ARHGEF10L	55160	up	0.631336	0.843054	0.0741447
CYP3A5	1577	up	0.667409	0.879183	0.0559208
HSPG2	3339	up	0.732661	0.910187	0.0408695
IFNAR2	3455	up	0.772508	0.910187	0.0408695
BCAS1	8537	up	0.769408	0.910187	0.0408695
VNN1	8876	up	0.716612	0.910187	0.0408695
KIAA0040	9674	up	0.718768	0.910187	0.0408695
TESC	54997	up	0.812662	0.910822	0.0405663
CCL20	6364	up	0.814506	0.910822	0.0405663
EDN1	1906	up	0.895086	0.958022	0.0186245
CHKA	1119	up	0.916005	0.965328	0.015325
TRNP1	388610	up	0.942993	0.971525	0.012546
EEPD1	80820	up	0.97838	0.985574	0.00631092
KIAA1377	57562	up	0.990656	0.990656	0.00407721
HNF4A	3172	down	0.976899	0.985574	-0.00631092
NR5A2	2494	down	0.951785	0.973093	-0.0118455
C21orf88	114041	down	0.943159	0.971525	-0.012546
NMUR2	56923	down	0.928417	0.97094	-0.0128076
SERPINA3	12	down	0.912294	0.965328	-0.015325
C1orf106	55765	down	0.883386	0.952944	-0.0209327
BCL2L15	440603	down	0.861011	0.936178	-0.0286415
ALDH1A3	220	down	0.831566	0.912608	-0.0397159
IGFBP1	3484	down	0.832671	0.912608	-0.0397159
CDH17	1015	down	0.78572	0.910822	-0.0405663
DLG3	1741	down	0.800778	0.910822	-0.0405663
DPP4	1803	down	0.800459	0.910822	-0.0405663
MYO6	4646	down	0.817746	0.910822	-0.0405663
CTSE	1510	down	0.741177	0.910187	-0.0408695
ZNF438	220929	down	0.773309	0.910187	-0.0408695
STEAP2	261729	down	0.763722	0.910187	-0.0408695
ANXA4	307	down	0.762585	0.910187	-0.0408695
HSD17B2	3294	down	0.755298	0.910187	-0.0408695
GCNT3	9245	down	0.777313	0.910187	-0.0408695
ELF3	1999	down	0.686331	0.88705	-0.0520517
LOC152225	NA	down	0.685563	0.88705	-0.0520517
MTMR11	10903	down	0.623883	0.843054	-0.0741447
FAM135A	57579	down	0.614898	0.843054	-0.0741447
PCSK5	5125	down	0.593802	0.838668	-0.0764097
UPK1B	7348	down	0.548509	0.791008	-0.101819
MBOAT1	154141	down	0.529723	0.772043	-0.112358
C10orf47	254427	down	0.52942	0.772043	-0.112358
CPM	1368	down	0.497434	0.746754	-0.126823
RBM47	54502	down	0.50147	0.746754	-0.126823
MANSC1	54682	down	0.499579	0.746754	-0.126823
HKDC1	80201	down	0.488193	0.746754	-0.126823
ANXA10	11199	down	0.459129	0.731404	-0.135843
PLEKHA1	59338	down	0.457225	0.731404	-0.135843
GALNT5	11227	down	0.414743	0.693124	-0.159189
CD55	1604	down	0.421776	0.693124	-0.159189
KCNK5	8645	down	0.424981	0.693124	-0.159189
GDA	9615	down	0.42337	0.693124	-0.159189
IRS2	8660	down	0.35925	0.639186	-0.194373
STEAP1	26872	down	0.34774	0.626847	-0.202839
EPCAM	4072	down	0.344159	0.626847	-0.202839
BCL10	8915	down	0.340354	0.626847	-0.202839
CEACAM1	634	down	0.331217	0.621599	-0.20649
SLC16A5	9121	down	0.322271	0.61321	-0.212391
C14orf105	55195	down	0.307113	0.607345	-0.216564
TMEM144	55314	down	0.303904	0.607345	-0.216564
CLMP	79827	down	0.310323	0.607345	-0.216564
CXADR	1525	down	0.288685	0.590296	-0.22893
MYH15	22989	down	0.28529	0.590296	-0.22893
LIMA1	51474	down	0.271575	0.572397	-0.242303
SLC22A3	6581	down	0.271487	0.572397	-0.242303
WWC1	23286	down	0.235162	0.519631	-0.284305
CYP24A1	1591	down	0.230828	0.518416	-0.285321
PLA2R1	22925	down	0.222063	0.507045	-0.294954
HS3ST1	9957	down	0.219199	0.507045	-0.294954
DUSP5	1847	down	0.209487	0.503505	-0.297997
AHR	196	down	0.199529	0.502814	-0.298593
KCNK1	3775	down	0.2043	0.502814	-0.298593
C1orf116	79098	down	0.20553	0.502814	-0.298593
TM4SF4	7104	down	0.190947	0.493581	-0.306641
NIPAL1	152519	down	0.181969	0.488216	-0.311388
FAM108C1	58489	down	0.185308	0.488216	-0.311388
KIF13B	23303	down	0.153616	0.420908	-0.375813
PARD6B	84612	down	0.131114	0.366583	-0.435828
LGALS3	3958	down	0.107707	0.307414	-0.512277
EPB41L1	2036	down	0.10164	0.305582	-0.514873
ANKRD22	118932	down	0.0898827	0.28637	-0.543072
DAPK1	1612	down	0.0893854	0.28637	-0.543072
SQRDL	58472	down	0.0856158	0.286082	-0.54351
ARL14	80117	down	0.0810438	0.277575	-0.55662
PRELID2	153768	down	0.0758365	0.2664	-0.574466
KLF5	688	down	0.071585	0.258083	-0.588241
MAL2	114569	down	0.0649801	0.244593	-0.611556
SFR1	119392	down	0.066058	0.244593	-0.611556
EHF	26298	down	0.0645832	0.244593	-0.611556
LAMB3	3914	down	0.0601211	0.242253	-0.615731
MIA2	117153	down	0.0570332	0.236774	-0.625665
FGD4	121512	down	0.0567808	0.236774	-0.625665
PLS1	5357	down	0.0550644	0.236774	-0.625665
ITGA6	3655	down	0.0505548	0.230867	-0.636638
CTTNBP2NL	55917	down	0.0459765	0.217199	-0.663142
SEMA4B	10509	down	0.0372235	0.182129	-0.73962
DHRS9	10170	down	0.0358757	0.182036	-0.739843
KLF3	51274	down	0.0334857	0.176444	-0.753394
LRRC1	55227	down	0.033366	0.176444	-0.753394
FERMT1	55612	down	0.0326482	0.176444	-0.753394
PKN2	5586	down	0.0260593	0.155223	-0.809044
FAM84B	157638	down	0.024059	0.149822	-0.824425
HAVCR1	26762	down	0.0220899	0.149084	-0.826568
IL20RA	53832	down	0.0228523	0.149084	-0.826568
SHROOM3	57619	down	0.0206706	0.149046	-0.82668
ARHGAP42	143872	down	0.0118221	0.117962	-0.928259
C12orf36	283422	down	0.0136744	0.117962	-0.928259
LAMC2	3918	down	0.0134503	0.117962	-0.928259
LMO7	4008	down	0.0148687	0.117962	-0.928259
OAS1	4938	down	0.0154986	0.117962	-0.928259
PERP	64065	down	0.0139784	0.117962	-0.928259
B3GNT5	84002	down	0.0153795	0.117962	-0.928259
FLRT3	23767	down	0.00678146	0.08446	-1.07335
COL17A1	1308	down	0.00468951	0.0749566	-1.12519
CHMP2B	25978	down	0.00547129	0.0749566	-1.12519
TES	26136	down	0.00526546	0.0749566	-1.12519
FGD6	55785	down	0.00375069	0.0734063	-1.13427
GPR87	53836	down	0.0026946	0.0641302	-1.19294
GPR126	57211	down	0.00280862	0.0641302	-1.19294
FAM3C	10447	down	0.00132978	0.0509878	-1.29253
DSG2	1829	down	0.000979961	0.0509878	-1.29253
ITGB6	3694	down	0.00148869	0.0509878	-1.29253
RHOF	54509	down	0.00020265	0.0277631	-1.55653

## Sheet: HNF1A_activated_survival
HNF1A-upregulated genes: association between gene expression and survival in TCGA PAAD tumors - related to Figure 7-figure supplement 1A
gene	entrez	survival_direction	p-value	fdr	log10_fdr_signed
FMO5	2330	up	0.0241826	0.18488	0.73311
PAQR8	85315	up	0.0983409	0.332954	0.477616
PPP1R13B	23368	up	0.102604	0.335933	0.473747
SAMD5	389432	up	0.104891	0.335934	0.473746
LOC285419	NA	up	0.219782	0.546405	0.262485
ADRB1	153	up	0.247328	0.569094	0.244816
RBPMS	11030	up	0.318956	0.641494	0.192808
SLC37A1	54020	up	0.319393	0.641494	0.192808
FAM110C	642273	up	0.32609	0.64343	0.191499
PIWIL4	143689	up	0.34174	0.652525	0.185403
AGR2	10551	up	0.412725	0.729859	0.136761
SLC35D2	11046	up	0.416452	0.729859	0.136761
ESRG	790952	up	0.406501	0.729859	0.136761
NR0B2	8431	up	0.411144	0.729859	0.136761
GPX2	2877	up	0.499172	0.795071	0.099594
LGALS4	3960	up	0.488769	0.795071	0.099594
C9orf68	55064	up	0.535874	0.818997	0.0867176
LGMN	5641	up	0.539087	0.818997	0.0867176
CXCL3	2921	up	0.559086	0.838628	0.0764304
CARD11	84433	up	0.567394	0.845738	0.0727643
GALC	2581	up	0.587141	0.864301	0.0633349
TOX3	27324	up	0.627933	0.868309	0.0613258
INSC	387755	up	0.633829	0.868309	0.0613258
PIK3CG	5294	up	0.623925	0.868309	0.0613258
ARHGEF10L	55160	up	0.631336	0.868309	0.0613258
ARHGAP24	83478	up	0.622088	0.868309	0.0613258
ZHX2	22882	up	0.65242	0.883564	0.0537622
CYP3A5	1577	up	0.667409	0.898727	0.0463724
FAM55B	120406	up	0.711688	0.921116	0.0356859
KBTBD12	166348	up	0.709099	0.921116	0.0356859
PLEKHA6	22874	up	0.748114	0.921116	0.0356859
HSPG2	3339	up	0.732661	0.921116	0.0356859
IFNAR2	3455	up	0.772508	0.921116	0.0356859
PFKFB2	5208	up	0.746691	0.921116	0.0356859
MUC13	56667	up	0.743739	0.921116	0.0356859
JPH1	56704	up	0.743021	0.921116	0.0356859
BCAS1	8537	up	0.769408	0.921116	0.0356859
VNN1	8876	up	0.716612	0.921116	0.0356859
KIAA0040	9674	up	0.718768	0.921116	0.0356859
TESC	54997	up	0.812662	0.922884	0.0348527
CCL20	6364	up	0.814506	0.922884	0.0348527
DENND2D	79961	up	0.809858	0.922884	0.0348527
EPS8L3	79574	up	0.840514	0.930849	0.0311205
DUOX2	50506	up	0.851844	0.937468	0.0280435
LCN2	3934	up	0.862462	0.93763	0.0279683
EDN1	1906	up	0.895086	0.963861	0.0159855
CHKA	1119	up	0.916005	0.966004	0.0150212
LSR	51599	up	0.916625	0.966004	0.0150212
ALOX5	240	up	0.922189	0.967074	0.0145402
TRNP1	388610	up	0.942993	0.976108	0.0105021
SDCBP	6386	up	0.963123	0.988139	0.00518182
EEPD1	80820	up	0.97838	0.989269	0.00468562
KIAA1377	57562	up	0.990656	0.991762	0.00359254
CD24	100133941	down	0.991762	0.991762	-0.00359254
HNF4A	3172	down	0.976899	0.989269	-0.00468562
HNF4G	3174	down	0.980921	0.989269	-0.00468562
TRIB3	57761	down	0.971722	0.989269	-0.00468562
NR5A2	2494	down	0.951785	0.980752	-0.00844077
C21orf88	114041	down	0.943159	0.976108	-0.0105021
NMUR2	56923	down	0.928417	0.969317	-0.0135344
SERPINA3	12	down	0.912294	0.966004	-0.0150212
TACSTD2	4070	down	0.917092	0.966004	-0.0150212
C4BPB	725	down	0.89879	0.963861	-0.0159855
C1orf106	55765	down	0.883386	0.955993	-0.0195453
BCL2L15	440603	down	0.861011	0.93763	-0.0279683
TRIM31	11074	down	0.854401	0.937468	-0.0280435
ALDH1A3	220	down	0.831566	0.926493	-0.0331577
FUT2	2524	down	0.825941	0.926493	-0.0331577
IGFBP1	3484	down	0.832671	0.926493	-0.0331577
SLC35F3	148641	down	0.80006	0.922884	-0.0348527
DLG3	1741	down	0.800778	0.922884	-0.0348527
DPP4	1803	down	0.800459	0.922884	-0.0348527
CAPN8	388743	down	0.804727	0.922884	-0.0348527
MYO6	4646	down	0.817746	0.922884	-0.0348527
CDH17	1015	down	0.78572	0.921859	-0.0353353
SH3D19	152503	down	0.782757	0.921859	-0.0353353
CTSE	1510	down	0.741177	0.921116	-0.0356859
ZNF438	220929	down	0.773309	0.921116	-0.0356859
FUT4	2526	down	0.774511	0.921116	-0.0356859
STEAP2	261729	down	0.763722	0.921116	-0.0356859
ANXA4	307	down	0.762585	0.921116	-0.0356859
HSD17B2	3294	down	0.755298	0.921116	-0.0356859
VSIG1	340547	down	0.726524	0.921116	-0.0356859
PELI2	57161	down	0.748547	0.921116	-0.0356859
BCL2L14	79370	down	0.761995	0.921116	-0.0356859
GCNT3	9245	down	0.777313	0.921116	-0.0356859
ELF3	1999	down	0.686331	0.908718	-0.0415711
PRSS3	5646	down	0.679575	0.908718	-0.0415711
LOC152225	NA	down	0.685563	0.908718	-0.0415711
F11R	50848	down	0.646806	0.880994	-0.0550268
SLCO1B1	10599	down	0.620644	0.868309	-0.0613258
MTMR11	10903	down	0.623883	0.868309	-0.0613258
FUT8	2530	down	0.621114	0.868309	-0.0613258
PCSK5	5125	down	0.593802	0.868309	-0.0613258
FAM135A	57579	down	0.614898	0.868309	-0.0613258
PTPRH	5794	down	0.616136	0.868309	-0.0613258
SAT1	6303	down	0.61681	0.868309	-0.0613258
ZNF165	7718	down	0.583218	0.863892	-0.0635406
UPK1B	7348	down	0.548509	0.828005	-0.0819672
MBOAT1	154141	down	0.529723	0.815223	-0.0887234
C10orf47	254427	down	0.52942	0.815223	-0.0887234
ARHGAP27	201176	down	0.511488	0.801705	-0.0959854
SAMD12	401474	down	0.514174	0.801705	-0.0959854
CPM	1368	down	0.497434	0.795071	-0.099594
RBM47	54502	down	0.50147	0.795071	-0.099594
MANSC1	54682	down	0.499579	0.795071	-0.099594
VPS37B	79720	down	0.50321	0.795071	-0.099594
HKDC1	80201	down	0.488193	0.795071	-0.099594
ANKRD36B	57730	down	0.469353	0.777879	-0.109088
ANXA10	11199	down	0.459129	0.766293	-0.115605
BAIAP2L1	55971	down	0.453004	0.766293	-0.115605
PLEKHA1	59338	down	0.457225	0.766293	-0.115605
FOS	2353	down	0.447092	0.762309	-0.117869
GALNT5	11227	down	0.414743	0.729859	-0.136761
CD55	1604	down	0.421776	0.729859	-0.136761
TINAGL1	64129	down	0.423956	0.729859	-0.136761
KCNK5	8645	down	0.424981	0.729859	-0.136761
GDA	9615	down	0.42337	0.729859	-0.136761
F2RL1	2150	down	0.368074	0.676228	-0.169907
DDR1	780	down	0.362821	0.671785	-0.17277
IRS2	8660	down	0.35925	0.670412	-0.173658
STEAP1	26872	down	0.34774	0.654082	-0.184368
EPCAM	4072	down	0.344159	0.652525	-0.185403
BCL10	8915	down	0.340354	0.652525	-0.185403
RASEF	158158	down	0.328841	0.64343	-0.191499
CEACAM1	634	down	0.331217	0.64343	-0.191499
SLC16A5	9121	down	0.322271	0.641834	-0.192578
PPP1R1C	151242	down	0.316249	0.641494	-0.192808
C14orf105	55195	down	0.307113	0.639534	-0.194136
TMEM144	55314	down	0.303904	0.639534	-0.194136
CLMP	79827	down	0.310323	0.639534	-0.194136
LOC283392	NA	down	0.309611	0.639534	-0.194136
CXADR	1525	down	0.288685	0.616381	-0.21015
MYH15	22989	down	0.28529	0.61467	-0.211358
SPINT1	6692	down	0.280787	0.610518	-0.214301
RASSF6	166824	down	0.274117	0.601534	-0.22074
LIMA1	51474	down	0.271575	0.601526	-0.220745
SLC22A3	6581	down	0.271487	0.601526	-0.220745
MST1R	4486	down	0.262369	0.592204	-0.227529
FRMD4B	23150	down	0.256914	0.585468	-0.232497
TSPAN3	10099	down	0.23032	0.546405	-0.262485
TC2N	123036	down	0.23423	0.546405	-0.262485
CYP24A1	1591	down	0.230828	0.546405	-0.262485
DGKA	1606	down	0.222975	0.546405	-0.262485
PLA2R1	22925	down	0.222063	0.546405	-0.262485
WWC1	23286	down	0.235162	0.546405	-0.262485
SLCO1B3	28234	down	0.225904	0.546405	-0.262485
C6orf132	647024	down	0.229387	0.546405	-0.262485
HS3ST1	9957	down	0.219199	0.546405	-0.262485
DUSP5	1847	down	0.209487	0.544098	-0.264323
MCU	90550	down	0.211211	0.544098	-0.264323
KCNK1	3775	down	0.2043	0.541229	-0.266619
C1orf116	79098	down	0.20553	0.541229	-0.266619
B3GALT5	10317	down	0.198553	0.537367	-0.269729
AHR	196	down	0.199529	0.537367	-0.269729
ERBB3	2065	down	0.191674	0.528217	-0.277187
TM4SF4	7104	down	0.190947	0.528217	-0.277187
FAM108C1	58489	down	0.185308	0.522834	-0.281637
NIPAL1	152519	down	0.181969	0.519598	-0.284332
DIAPH2	1730	down	0.16642	0.480994	-0.31786
GPR110	266977	down	0.161428	0.472327	-0.325757
KIF13B	23303	down	0.153616	0.455087	-0.341905
TMTC2	160335	down	0.145814	0.437441	-0.359081
SLCO1B7	338821	down	0.142077	0.431695	-0.364823
PARD6B	84612	down	0.131114	0.403558	-0.394094
LPCAT4	254531	down	0.126824	0.39549	-0.402865
LGALS3	3958	down	0.107707	0.340354	-0.468069
CRYZ	1429	down	0.103473	0.335933	-0.473747
EPB41L1	2036	down	0.10164	0.335933	-0.473747
ANKRD22	118932	down	0.0898827	0.308727	-0.510425
DAPK1	1612	down	0.0893854	0.308727	-0.510425
TMC7	79905	down	0.0873634	0.308727	-0.510425
SQRDL	58472	down	0.0856158	0.307438	-0.512242
ARL14	80117	down	0.0810438	0.295498	-0.529445
PRELID2	153768	down	0.0758365	0.280832	-0.551553
KLF5	688	down	0.071585	0.269296	-0.56977
AP1AR	55435	down	0.0686952	0.262593	-0.580717
MAL2	114569	down	0.0649801	0.256651	-0.590656
SFR1	119392	down	0.066058	0.256651	-0.590656
EHF	26298	down	0.0645832	0.256651	-0.590656
BACH1	571	down	0.0624395	0.255141	-0.593221
LAMB3	3914	down	0.0601211	0.249977	-0.602099
OBFC1	79991	down	0.0588266	0.248963	-0.603866
SPINT2	10653	down	0.0572558	0.246721	-0.607794
MIA2	117153	down	0.0570332	0.246721	-0.607794
FGD4	121512	down	0.0567808	0.246721	-0.607794
PLS1	5357	down	0.0550644	0.246721	-0.607794
DSP	1832	down	0.05225	0.242809	-0.614736
ITGA6	3655	down	0.0505548	0.23963	-0.620459
CTTNBP2NL	55917	down	0.0459765	0.222376	-0.652912
FGFBP1	9982	down	0.0416999	0.205893	-0.686357
SDR16C5	195814	down	0.038827	0.195787	-0.708216
DHRS9	10170	down	0.0358757	0.191782	-0.717192
SEMA4B	10509	down	0.0372235	0.191782	-0.717192
ANXA3	306	down	0.0370652	0.191782	-0.717192
MYO5C	55930	down	0.035584	0.191782	-0.717192
INADL	10207	down	0.0323357	0.191153	-0.718618
KLF3	51274	down	0.0334857	0.191153	-0.718618
LRRC1	55227	down	0.033366	0.191153	-0.718618
FERMT1	55612	down	0.0326482	0.191153	-0.718618
RASA1	5921	down	0.0329644	0.191153	-0.718618
SAV1	60485	down	0.0306749	0.191153	-0.718618
FRMD5	84978	down	0.0329398	0.191153	-0.718618
CHMP4C	92421	down	0.0338753	0.191153	-0.718618
B3GNT3	10331	down	0.0252984	0.186897	-0.728399
ESRP1	54845	down	0.0268122	0.186897	-0.728399
PKN2	5586	down	0.0260593	0.186897	-0.728399
FAM84B	157638	down	0.024059	0.18488	-0.73311
HAVCR1	26762	down	0.0220899	0.18488	-0.73311
IL20RA	53832	down	0.0228523	0.18488	-0.73311
SHROOM3	57619	down	0.0206706	0.181442	-0.741263
DSC2	1824	down	0.0184461	0.168143	-0.77432
P2RY2	5029	down	0.0166386	0.157734	-0.802076
ARHGAP42	143872	down	0.0118221	0.153049	-0.81517
C12orf36	283422	down	0.0136744	0.153049	-0.81517
LAMC2	3918	down	0.0134503	0.153049	-0.81517
LMO7	4008	down	0.0148687	0.153049	-0.81517
OAS1	4938	down	0.0154986	0.153049	-0.81517
PERP	64065	down	0.0139784	0.153049	-0.81517
GREB1L	80000	down	0.0113082	0.153049	-0.81517
B3GNT5	84002	down	0.0153795	0.153049	-0.81517
GPRC5A	9052	down	0.0147242	0.153049	-0.81517
FLRT3	23767	down	0.00678146	0.107147	-0.97002
LIPH	200879	down	0.0062223	0.105335	-0.977429
COL17A1	1308	down	0.00468951	0.0997458	-1.00111
CHMP2B	25978	down	0.00547129	0.0997458	-1.00111
TES	26136	down	0.00526546	0.0997458	-1.00111
SERPINB5	5268	down	0.0041633	0.0986703	-1.00581
FGD6	55785	down	0.00375069	0.0986703	-1.00581
MMP28	79148	down	0.00324114	0.0960188	-1.01764
GPR87	53836	down	0.0026946	0.0950919	-1.02186
GPR126	57211	down	0.00280862	0.0950919	-1.02186
FAM3C	10447	down	0.00132978	0.0705641	-1.15142
DSG2	1829	down	0.000979961	0.0705641	-1.15142
ITGB6	3694	down	0.00148869	0.0705641	-1.15142
UCA1	652995	down	0.000431485	0.0511309	-1.29132
RHOF	54509	down	0.00020265	0.0480282	-1.3185

## Sheet: HNF1A_repressed_survival
HNF1A-downregulated genes: association between gene expression and survival in TCGA PAAD tumors - related to Figure 7-figure supplement 1B
gene	entrez	survival_direction	p-value	fdr	log10_fdr_signed
TBC1D4	9882	up	0.0242501	0.363752	0.439194
AKR1C1	1645	up	0.0768005	0.530067	0.27567
FAM105A	54491	up	0.0484208	0.530067	0.27567
FABP4	2167	up	0.108011	0.607564	0.216408
SYNM	23336	up	0.177164	0.754663	0.122247
PPP2R2B	5521	up	0.191233	0.754663	0.122247
ABCB6	10058	up	0.289787	0.831921	0.0799178
EPHX1	2052	up	0.261353	0.831921	0.0799178
MGP	4256	up	0.295794	0.831921	0.0799178
GATA2	2624	up	0.333877	0.883792	0.05365
CTSD	1509	up	0.459508	0.917169	0.0375507
G6PD	2539	up	0.487457	0.917169	0.0375507
OSGIN1	29948	up	0.489157	0.917169	0.0375507
CYTIP	9595	up	0.416925	0.917169	0.0375507
OSBPL6	114880	up	0.925605	0.987722	0.00536522
CSF1	1435	up	0.897666	0.987722	0.00536522
AKR1C2	1646	up	0.587068	0.987722	0.00536522
HMOX1	3162	up	0.682438	0.987722	0.00536522
ITPR2	3709	up	0.649687	0.987722	0.00536522
RGS4	5999	up	0.952458	0.987722	0.00536522
ZNF323	64288	up	0.800156	0.987722	0.00536522
TTLL7	79739	up	0.676227	0.987722	0.00536522
ZEB2	9839	up	0.845077	0.987722	0.00536522
MRC2	9902	up	0.882621	0.987722	0.00536522
SNAI1	6615	down	0.9924	0.9924	-0.00331325
CITED2	10370	down	0.910334	0.987722	-0.00536522
LIMCH1	22998	down	0.732013	0.987722	-0.00536522
AKR1B1	231	down	0.696641	0.987722	-0.00536522
MAMDC2	256691	down	0.965773	0.987722	-0.00536522
GJA1	2697	down	0.88743	0.987722	-0.00536522
ANPEP	290	down	0.820237	0.987722	-0.00536522
HEG1	57493	down	0.923291	0.987722	-0.00536522
SPARC	6678	down	0.671973	0.987722	-0.00536522
CACNA2D1	781	down	0.747732	0.987722	-0.00536522
SYDE2	84144	down	0.860412	0.987722	-0.00536522
IL6	3569	down	0.397135	0.917169	-0.0375507
CDON	50937	down	0.474558	0.917169	-0.0375507
THBS1	7057	down	0.425445	0.917169	-0.0375507
STC1	6781	down	0.234182	0.81063	-0.0911774
C5orf30	90355	down	0.166626	0.754663	-0.122247
SPECC1	92521	down	0.201243	0.754663	-0.122247
GPR1	2825	down	0.0824548	0.530067	-0.27567
LEPREL1	55214	down	0.0683068	0.530067	-0.27567
PYGL	5836	down	0.0201521	0.363752	-0.439194
TNFSF10	8743	down	0.00381908	0.171858	-0.764829

## Sheet: TCGA donors
TCGA donors used in survival analysis - related to Figures 7E, Figure 7-figure supplements 1A and 1B
tcga-2j-aab1
tcga-2j-aab4
tcga-2j-aab6
tcga-2j-aab8
tcga-2j-aab9
tcga-2j-aaba
tcga-2j-aabe
tcga-2j-aabf
tcga-2j-aabh
tcga-2j-aabi
tcga-2j-aabk
tcga-2j-aabo
tcga-2j-aabp
tcga-2j-aabr
tcga-2j-aabt
tcga-2j-aabu
tcga-2j-aabv
tcga-2l-aaqa
tcga-2l-aaqe
tcga-2l-aaqi
tcga-2l-aaqj
tcga-2l-aaql
tcga-3a-a9i5
tcga-3a-a9i7
tcga-3a-a9i9
tcga-3a-a9ib
tcga-3a-a9ic
tcga-3a-a9ih
tcga-3a-a9iu
tcga-3a-a9ix
tcga-3a-a9iz
tcga-3a-a9j0
tcga-3e-aaay
tcga-3e-aaaz
tcga-f2-6879
tcga-f2-6880
tcga-f2-7273
tcga-f2-7276
tcga-f2-a44g
tcga-f2-a44h
tcga-f2-a7tx
tcga-f2-a8yn
tcga-fb-a4p5
tcga-fb-a4p6
tcga-fb-a545
tcga-fb-a5vm
tcga-fb-a78t
tcga-fb-a7dr
tcga-fb-aapp
tcga-fb-aapq
tcga-fb-aaps
tcga-fb-aapu
tcga-fb-aapy
tcga-fb-aapz
tcga-fb-aaq0
tcga-fb-aaq1
tcga-fb-aaq2
tcga-fb-aaq3
tcga-fb-aaq6
tcga-h6-8124
tcga-h6-a45n
tcga-h8-a6c1
tcga-hv-a5a3
tcga-hv-a5a4
tcga-hv-a5a5
tcga-hv-a5a6
tcga-hv-a7ol
tcga-hv-a7op
tcga-hv-aa8v
tcga-hv-aa8x
tcga-hz-7289
tcga-hz-7918
tcga-hz-7919
tcga-hz-7920
tcga-hz-7922
tcga-hz-7923
tcga-hz-7924
tcga-hz-7925
tcga-hz-7926
tcga-hz-8001
tcga-hz-8002
tcga-hz-8003
tcga-hz-8005
tcga-hz-8315
tcga-hz-8317
tcga-hz-8519
tcga-hz-8636
tcga-hz-8637
tcga-hz-8638
tcga-hz-a49g
tcga-hz-a49h
tcga-hz-a49i
tcga-hz-a4bh
tcga-hz-a4bk
tcga-hz-a77o
tcga-hz-a77p
tcga-hz-a77q
tcga-hz-a8p0
tcga-hz-a8p1
tcga-hz-a9tj
tcga-ib-7644
tcga-ib-7645
tcga-ib-7646
tcga-ib-7647
tcga-ib-7649
tcga-ib-7651
tcga-ib-7652
tcga-ib-7654
tcga-ib-7885
tcga-ib-7886
tcga-ib-7887
tcga-ib-7888
tcga-ib-7889
tcga-ib-7890
tcga-ib-7891
tcga-ib-7893
tcga-ib-7897
tcga-ib-8126
tcga-ib-8127
tcga-ib-a5so
tcga-ib-a5sp
tcga-ib-a5sq
tcga-ib-a5ss
tcga-ib-a5st
tcga-ib-a6uf
tcga-ib-a6ug
tcga-ib-a7lx
tcga-ib-a7m4
tcga-ib-aaum
tcga-ib-aaun
tcga-ib-aauo
tcga-ib-aaup
tcga-ib-aauq
tcga-ib-aaur
tcga-ib-aaus
tcga-ib-aaut
tcga-ib-aauu
tcga-ib-aauv
tcga-ib-aauw
tcga-l1-a7w4
tcga-lb-a7sx
tcga-lb-a8f3
tcga-lb-a9q5
tcga-m8-a5n4
tcga-oe-a75w
tcga-pz-a5re
tcga-q3-a5qy
tcga-q3-aa2a
tcga-rb-a7b8
tcga-rb-aa9m
tcga-rl-aaas
tcga-s4-a8rm
tcga-s4-a8ro
tcga-s4-a8rp
tcga-us-a774
tcga-us-a776
tcga-us-a779
tcga-us-a77e
tcga-us-a77g
tcga-us-a77j
tcga-xd-aaug
tcga-xd-aauh
tcga-xd-aaui
tcga-xd-aaul
tcga-xn-a8t3
tcga-yb-a89d
tcga-yh-a8sy
tcga-yy-a8lh
tcga-z5-aapl

[truncated: 9 more sheets: CSC50 oPOSSUM3, predicted HNF1A targets, HNF1A upreg genes oPOSSUM3, HNF1A downreg genes oPOSSUM, predicted POU5F1 targets, NY15 rep1 peaks enh, NY15 rep2 peaks enh, NY8 rep1 peaks enh, NY8 rep2 peaks enh]
